# Supplementary material for: A structurally conserved helix enables leader-independent tyramine splicing of proteins
Source: Royal Society of Chemistry journal article supplement (doi:10.1039/d4sc03867c), 2024-01-01
Supplement: d4sc03867c1.pdf [file d4sc03867c1.pdf]

## Supplementary Information

| Supplementary Figure | Figure Title                                                                                                       | Page |
|----------------------|--------------------------------------------------------------------------------------------------------------------|------|
| 1                    | Structural models of PcpA and SUMO-PcpX                                                                            | 5    |
| 2                    | Multiple sequence alignment of PcpY, PlpY and leader sequences of type II spliceotides                             | 5    |
| 3                    | Multiple sequence alignment of PcpY, PlpY and leader sequences of type III spliceotides                            | 5    |
| 4                    | Multiple sequence alignment of PcpY, PlpY and leader sequences of type V spliceotides                              | 6    |
| 5                    | Structural models showing differences in the binding helix                                                         | 6    |
| 6                    | LC-MS analysis for His <sub>6</sub> -PcpA cleaved with trypsin and GluC with different concentrations of SUMO-PcpY | 7    |
| 7                    | LC-MS analysis for His <sub>6</sub> -PlpA3                                                                         | 8    |
| 8                    | LC-MS analysis for His <sub>6</sub> -PlpA3-33                                                                      | 9    |
| 9                    | LC-MS analysis for His <sub>6</sub> -PlpA3-45                                                                      | 10   |
| 10                   | LC-MS analysis for His <sub>6</sub> -PlpA3 and PlpXY <sub>fusion</sub>                                             | 11   |
| 11                   | LC-MS analysis for His <sub>6</sub> -PcpA and PcpXY <sub>fusion</sub>                                              | 12   |
| 12                   | LC-MS analysis for His <sub>6</sub> -RhaA                                                                          | 13   |
| 13                   | LC-MS analysis for His <sub>6</sub> -SUMO-RhaA <sub>core</sub>                                                     | 14   |
| 14                   | Localization of C <sub>8</sub> H <sub>9</sub> NO loss from His <sub>6</sub> -SUMO-RhaA <sub>core</sub>             | 15   |
| 15                   | LC-MS analysis for His <sub>6</sub> -mCherry109-RhaA <sub>core</sub>                                               | 16   |
| 16                   | Localization of C <sub>8</sub> H <sub>9</sub> NO loss from His <sub>6</sub> -mCherry109-RhaA <sub>core</sub>       | 17   |
| 17                   | LC-MS analysis for His <sub>6</sub> -SUMO-RhaA <sub>core</sub> after 4.5 h, 24 h, and 48 h.                        | 18   |
| 18                   | LC-MS analysis for His <sub>6</sub> -DHFR118-RhaA <sub>core</sub>                                                  | 19   |
| 19                   | LC-MS analysis for His <sub>6</sub> -MBP-Cterm-RhaA <sub>core</sub>                                                | 20   |
| 20                   | LC-MS analysis for His <sub>6</sub> -MBP154-RhaA <sub>core</sub>                                                   | 21   |
| 21                   | LC-MS analysis for DHFR-Nterm-RhaA <sub>core</sub> -His <sub>6</sub>                                               | 22   |
| 22                   | LC-MS analysis for His <sub>6</sub> -SUMO-Nterm-RhaA <sub>core</sub>                                               | 23   |
| 23                   | Localization of C <sub>8</sub> H <sub>9</sub> NO loss from His <sub>6</sub> -MBP-Cterm-RhaA <sub>core</sub>        | 24   |
| 24                   | LC-MS analysis for His <sub>6</sub> -SUMO-RhaA <sub>core</sub> -N8                                                 | 25   |
| 25                   | LC-MS analysis for His <sub>6</sub> -SUMO-RhaA <sub>core</sub> -N24                                                | 26   |
| 26                   | LC-MS analysis for His <sub>6</sub> -SUMO-RhaA <sub>core</sub> -N32                                                | 27   |
| 27                   | LC-MS analysis for His <sub>6</sub> -SUMO-RhaA <sub>core</sub> -N24C4                                              | 28   |
| 28                   | LC-MS analysis for His <sub>6</sub> -SUMO-RhaA <sub>core</sub> -N24C8                                              | 29   |
| 29                   | LC-MS analysis for His <sub>6</sub> -SUMO-RhaA <sub>core</sub> -N24C10                                             | 30   |

## Methods

### General

All reagents were purchased from commercial sources and used as received. Solvents were procured from Sigma-Aldrich and used as received. Double-distilled water was obtained from a PURELAB Chorus system (ELGA Veolia). Oligonucleotides for molecular cloning were synthesized by Microsynth (Switzerland). Plasmids were purified with the NucleoSpin plasmid purification kit purchased from Macherey-Nagel (Germany), agarose gel purifications were carried out with the NucleoSpin Gel and PCR Clean-up kit (Macherey-Nagel, Germany). Q5® Site-Directed Mutagenesis kit, restriction enzymes, T4 DNA ligase and Q5 DNA polymerase were purchased from New England Biolabs (NEB, USA). Antibiotics (chloramphenicol, kanamycin, spectinomycin) were purchased from Applichem. GluC endoprotease was purchased from NEB (USA) and sequencing grade trypsin endoprotease was purchased from Promega. Bacteria lysis was done on a Qsonica Q700 sonicator equipped with either a 2 or 12 mm probe. Protino® agarose Ni-NTA resin was purchased from Macherey-Nagel (Germany). LC-MS experiments were performed on a Dionex Ultimate 3000 UHPLC equipped with columns from Phenomenex (USA) and coupled to a mass spectrometer. Mass spectra were acquired on an LTQ Orbitrap XL or Q Exactive (Thermo Fisher Scientific) spectrometer by using heated electrospray ionization

(HESI). LC/MS data was analyzed with the Thermo Xcalibur Qual browser 4.1 (Thermo Fisher Scientific). Data analysis and statistical analysis were done in Microsoft Excel (2016) and Prism 9 (GraphPad).

### **Bioinformatic analysis**

Multiple sequence alignments of PcpY, PipY, and spliceotide leader sequences were made using MUSCLE in Geneious 7.1.9. Sequences were selected from previously reported precursor predictions,<sup>1</sup> and leader sequences were selected by truncating the sequences at the first double glycine motif in the sequence. Sequences not containing a double glycine motif were excluded from the analysis.

### **Structure predictions**

Protein and protein complex structure predictions were conducted with AlphaFold Version 2.2.0 by providing FASTA files containing the amino acid sequences of the respective proteins.<sup>2,3</sup> AlphaFold2 was accessed in the ETH Euler cluster through a bash script.

### **Plasmid construction**

All plasmids used in this study are listed in Table S2. Protein production plasmids were constructed by Gibson Assembly® Cloning (for genes >100 base pairs) or Q5® site-directed mutagenesis (for genes <100 base pairs) protocol provided by New England Biolabs (USA). Genes encoding for His<sub>6</sub>-SUMO-Rha<sub>core</sub> truncation precursors were ordered from Twist Bioscience as gene fragments with flanking NcoI and BamHI restriction sites and subcloned into pACYCDuet vectors through restriction cloning (NEB). Gene assembly fragments were designed by NEBuilder tool online. Overlapping mutagenic primers were designed by NEBaseChanger tool online. A typical polymerase chain reaction (PCR) (50 µL) contained 20 ng template DNA, 1× Q5 reaction buffer, 200 µM dNTPs, 0.5 µM of each primer (Table S1), and 0.5 u Q5 High-Fidelity DNA Hot-Start Polymerase. The reaction was heated to 98 °C for 45 s followed by 35 cycles of 98 °C for 10 s, X °C for 20 s, and 72 °C for 20 s per kilobase DNA target sequence. The primer annealing temperature X was calculated with the NEB Tm calculator website or the NEBaseChanger (in case of the Q5 site-directed mutagenesis protocol). The resulting PCR amplicons were treated with kinase-ligase-DpnI mix (KLD mix, NEB). Gibson Assembly® was performed with Gibson Assembly Master Mix (New England BioLabs) according to the manufacturer's instructions. DNA was visualized by 1% (w/v) agarose gel electrophoresis supplemented with ethidium bromide and GeneRuler™ 1kb DNA ladder (Thermo Scientific) marker. Plasmids were transformed into chemically competent *E. coli* DH5α strain (Invitrogen) and grown on LB agar containing appropriate antibiotics, then inoculated in corresponding liquid LB media. Plasmids were isolated from fresh overnight cultures and the gene-of-interest was sequence-verified by Microsynth AG (Switzerland). Sequence-verified plasmids were transformed into chemically competent *E. coli* BL21(DE3). All plasmids are under isopropyl-β-D-1-thiogalactopyranoside (IPTG) regulation. pACYCDuet encodes chloramphenicol resistance, pRSFDuet kanamycin resistance, and pCDFDuet spectinomycin resistance.

### **Protein expression and purification of substrate proteins**

A Falcon tube containing 5 mL of LB medium was inoculated with *E. coli* BL21(DE3) cells taken from previously prepared glycerol stocks or from colonies on agar plates and supplemented with the appropriate antibiotics. The culture was shaken at 180 rpm overnight at 37 °C.

On the next day, 100 mL TB medium containing the appropriate antibiotics were inoculated with 1% v/v of this overnight culture and shaken at 37 °C until an OD<sub>600</sub> of 1.2 to 1.6 was reached, according to previously reported expressions in similar systems.<sup>4</sup> After cooling the cultures at 4 °C for at least 20 min, 1 mM of IPTG was added and the cultures were

incubated on a shaker at 180 rpm at 16 °C for approximately 16 to 20 h. Subsequently, 40 mL from the cultures were centrifuged at 6000 × g for 10 min at 4 °C. The supernatant was discarded, and the cell pellets resuspended in 1 mL NPI-10 buffer. All NPI buffers were supplemented with 10% Glycerol. NPI buffers contain 50 mM NaH<sub>2</sub>PO<sub>4</sub>, 300 mM NaCl, 5 - 250 mM imidazole (where NPI-X contains X mM imidazole) and are adjusted to pH 8.0.

Cells resuspended in NPI-10 buffer were sonicated for 12 times 10 s, with 10 s of pause in between, at an amplitude of 30% to 40%. A sonication tip with a diameter of 2 mm was used, the resulting suspensions were kept on ice and centrifuged at 21000 × g for 30 min at 4 °C.

The supernatant was transferred to a new tube and 125 µL of Protino<sup>®</sup> Ni-nitrilotriacetic acid (NTA) Agarose (Macherey-Nagel) was added. The samples were slowly shaken on a rotor at 10 rpm for at least 30 min. An appropriate polypropylene column was prewashed with NPI-10 buffer, the sample added, washed twice with NPI-10 (500 µL), twice with NPI-20 (500 µL), and the protein eluted with NPI-250 (550 µL) and collected. Elution fractions were digested with appropriate endoproteases. Protein splicing was analyzed by high-resolution LC-MS-MS. Samples were stored at -20 °C for further use.

Protein substrates for *in vitro* reactions were buffer-exchanged with PD MidiTrap G-25 columns (Cytiva) to reaction buffer (50 mM HEPES, 150 mM KCl, 10 % glycerol, pH 8) according to the manufacturer's protocol, frozen with liquid nitrogen and transferred to an anaerobic workstation (UNIlab pro, MBRAUN) for further use.

#### **Time course of modification of His<sub>6</sub>-RhaA and His<sub>6</sub>-SUMO-Rha<sub>core</sub> by RhaX and RhaX<sub>leader</sub>**

Protein expressions were set up as described above for His<sub>6</sub>-RhaA and His<sub>6</sub>-SUMO-Rha<sub>core</sub> with either RhaX and RhaX<sub>leader</sub> in duplicates. After 4.5 h, 24 h, and 48 h a 10 mL aliquot of the expression cultures was taken and stored at -20 °C until purified as usual. Proteins were digested by trypsin and analyzed by LC-MS to quantify relative conversion and signals of modified and unmodified peptide.

#### **Protein purification and reconstitution of radical SAM enzymes**

A Falcon tube containing 10 mL of LB medium was inoculated with *E. coli* BL21(DE3) cells taken from previously prepared glycerol stocks or from single colonies on agar plates and supplemented with the appropriate antibiotics. The culture was shaken at 180 rpm overnight at 37 °C.

On the next day, two Ultrayield<sup>®</sup> 2.5 L flasks (Thomson) filled with 1 L TB medium containing the appropriate antibiotics were inoculated with 1% v/v of the overnight culture, supplemented with 25 µM FeCl<sub>3</sub> and shaken at 37 °C until an OD<sub>600</sub> of around 1.5 was reached, according to previously reported expressions in similar systems.<sup>4</sup> After cooling the cultures at 4 °C for at least 20 min, 1 mM of IPTG, 25 µM FeCl<sub>3</sub>, and 300 µM L-Cys were added and the cultures were incubated on a shaker at 180 rpm at 16 °C for approximately 16 to 20 h. Subsequently, the cultures were centrifuged at 6000 × g for 10 min at 4 °C. The supernatant was discarded and the cell pellets resuspended in 4 mL NPI-5 buffer per gram cell pellet. Suspensions were supplemented with cOmplete Protease Inhibitor Cocktail (Roche), 2 mM DTT and 0.5 mg/mL lysozyme (Roth) and incubated at 4 °C for 1 h.

Cells resuspended in NPI-5 buffer were sonicated for 12 times 10 s, with 10 s of pause, at an amplitude of 50% to 70%. A sonication tip with a diameter of 12 mm was used. The resulting suspensions were kept on ice and centrifuged at 18000 × g for 45 min at 4 °C.

The supernatant was transferred to a new tube and 4 mL of cOmplete His-tag purification resin (Roche) was added. The samples were slowly shaken on a rotor at 10 rpm for at least 30 min. Samples were centrifuged at 800 × g for 1

min, the supernatant carefully removed, and the resin resuspended in the same volume of NPI-5. This wash was repeated twice. An appropriate polypropylene column was prewashed with NPI-5 buffer, the sample added, washed twice with NPI-5 (5 column volumes), twice with NPI-20 (1 column volume), and the protein eluted with NPI-250 (three times 1 column volume) and pooled. Elution fractions were concentrated using 30 kDa MWCO Amicon-ULTRA-15 centrifugal filters to a volume of 0.5–1 mL. Samples were supplemented with 5 mM DTT, frozen with liquid nitrogen, and transferred to an anaerobic workstation.

After at least 16 h in an anaerobic environment, samples were buffer-exchanged using PD-10 columns (Cytiva) to reaction buffer (50 mM HEPES, 150 mM KCl, 10 % glycerol, pH 8) following the manufacturer's instructions. Samples were concentrated/diluted to around 250  $\mu$ M and added with 20 equivalents DTT, 13 equivalents FeCl<sub>2</sub>, 12 equivalents L-Cys and 1  $\mu$ M of eclscS (*E. coli* cysteine desulfurase) and incubated overnight at 4 °C. Samples were then again buffer-exchanged to reaction buffer and concentrated to 250–1000  $\mu$ M, frozen and stored for further use.

#### **Analytical high-performance liquid chromatography-size exclusion chromatography**

Reconstituted SUMO-tagged PcpX (57.7 kDa) or PcpXY (64.1 kDa) were incubated with PcpA (18.3 kDa) and transferred to air-tight vials prior to removal from the anaerobic chamber. Samples of individual components were similarly prepared for comparison, and all samples were separated by HPLC-SEC.

#### **Anaerobic *in vitro* reactions**

For anaerobic reactions, N-terminally His<sub>6</sub>-tagged ecFidA and ecFpr from the ASKA collection<sup>5</sup> were expressed according to the general protein expression and purification protocol. Elution fractions were concentrated, frozen and transferred to an anaerobic workstation and buffer-exchanged to reaction buffer with PD MidiTrap G-25 (Cytiva) columns.

Anaerobic reactions were carried out as follows: 50  $\mu$ M splicease (SUMO-PcpX, SUMO-PcpXY or SUMO-PcpXY<sub>fusion</sub>), 0–500  $\mu$ M SUMO-PcpY, 100  $\mu$ M PcpA, 20  $\mu$ M ecFidA, 5  $\mu$ M ecFpr, 2 mM NADPH, 10 mM DTT and filled with reaction buffer to 50  $\mu$ L.<sup>6</sup> Reactions were typically carried out at room temperature for 3 h, then removed from the glovebox and directly digested with appropriate proteases and analyzed by LC-MS-MS.

#### **High-resolution mass spectrometry**

Mass spectra were acquired on an LTQ Orbitrap XL, Q Exactive, or Ascend Tribrid (Thermo Fisher Scientific, USA) spectrometer by using heated electrospray ionization (HESI). The following method was used for analysis on LC-MS:

Solvent A: H<sub>2</sub>O + 0.1% formic acid; solvent B: MeCN + 0.1% formic acid; column, Phenomenex Kinetex 2.6  $\mu$ m C18-XB 100 Å (150 × 4.6 mm); flow rate, 0.7 mL/min; gradient: 95:5 A/B for 0.5 min ramped to 5:95 A/B over 20 min).

For MS-MS analysis, a normalized collision energy of 15 to 28 was used, depending on the observed fragmentation properties of peptide fragments. The MS instrument was operated in positive ionization mode at a scan range of 400–2000  $m/z$  (or alternatively 700–1500  $m/z$ ), AGC target 2e5, maximum IT 100 ms and a resolution of 70000 at 400  $m/z$ . The spray voltage was set to 5.0 kV, the probe heater temperature to 475 °C, and the capillary temperature to 270 °C. Columns were heated to 50 °C.

Supplementary Figures and Tables

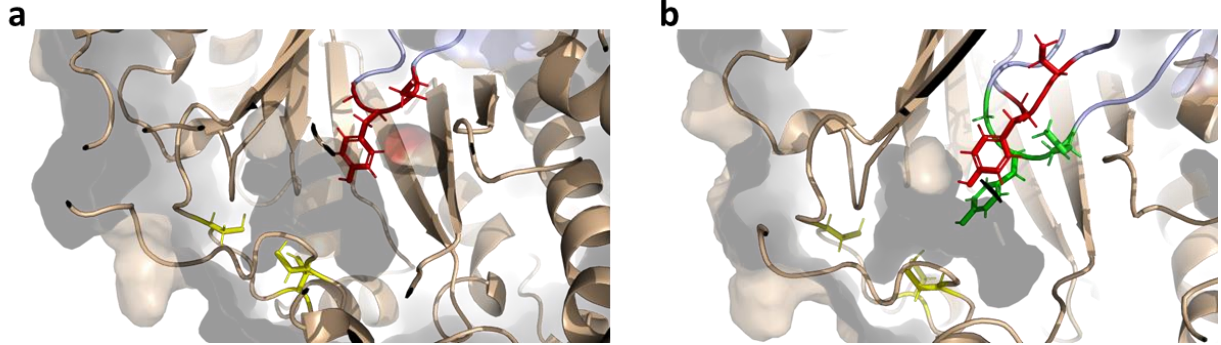

**Supplementary Figure S1.** a) AlphaFold model of PcpA and SUMO-PcpX with the N-terminal MYG site (red) placed in the putative active site near the putative iron-binding cysteines (yellow). b) Structural model of PcpA and SUMO-PcpX with the two MYG sites (red and green) placed in the putative active site near the putative iron-binding cysteines (yellow).

|                                     | 1            | 10          | 20        | 30       | 40         | 50        |
|-------------------------------------|--------------|-------------|-----------|----------|------------|-----------|
| pCDF-6xH-PcpY_translation           | .MVENIDNEREK | SANEIEPESLL | LPRQA     | WQSQTAYL | KAILKAKQAL | DRITKRYLR |
| pRSFDuet-1_PlpXY_-_PlpY_translation | MNSNQIPNKV   | AATAAQKSD   | DSSSVLPRQ | GWQDKQAF | IKALIKAKQ  | SLIEAETS  |
| R._aquimaris_B26                    |              |             |           | MKNV     | KLDL       | NHVV      |
| R._pleomorphica_PKS7                |              |             |           | MKNL     | QHD        | RNH       |
| P._phenolica_S4048                  |              |             |           | MKLS     | KQNK       | KEVI      |
| P._sp_ARS97                         |              |             |           | MKLS     | KQNK       | KEVI      |
| P._rubra_W3                         |              |             |           | MKI      | KQNK       | KLVI      |
| P._viridis_BBR56                    |              |             |           | MKI      | KQNK       | KLVI      |
| P._luteoviolacea_2ta16              |              |             |           | MKT      | KQNK       | KAVI      |
| P._luteoviolacea_MMG009             |              |             |           | MKT      | KQNK       | KAVI      |
| P._rubra_S2599                      |              |             |           | MKT      | KQNK       | KAVI      |
| P._rubra_S2678                      |              |             |           | MKT      | KQNK       | KAVI      |
| P._sp_R3                            |              |             |           | MKT      | KQNK       | KAVI      |
| P._rubra_OCN096                     |              |             |           | MKT      | KQNK       | KAVI      |
| PsrA                                |              |             |           | MKT      | KQNK       | KAVI      |
| PphA                                |              |             |           | MKNV     | HQDF       | HD        |
| Psp2A                               |              |             |           | MKD      | LHQNM      | QDVT      |
| C._bacterium_ARS1043                |              |             |           | MKQ      | TSKDM      | KE        |
| P._phenolica_S4048                  |              |             |           | MRI      | KNYKM      | NEL       |
| Psp1A                               |              |             |           | MRN      | KNYDM      | QEL       |

**Supplementary Figure S2.** Multiple sequence alignment of PcpY, PlpY, and leader sequences of type II spliceotides.<sup>1</sup> R.\_aquimaris\_B26 is the RhaA leader peptide. Sequences were aligned with MUSCLE in Geneious 7.1.9 and the alignment image was generated using ESPrnt 3.0.<sup>7</sup>

|                                           | 1            | 10          | 20        | 30        | 40         | 50        |
|-------------------------------------------|--------------|-------------|-----------|-----------|------------|-----------|
| pCDF-6xH-PcpY_translation                 | .MVENIDNEREK | SANEIEPESLL | LPRQ      | AWQSQTAYL | KAILKAKQAL | DRITKRYLR |
| pRSFDuet-1_PlpXY_-_PlpY_translation       | MNSNQIPNKV   | AATAAQKSD   | DSSSVLPRQ | GWQDKQAF  | IKALIKAKQ  | SLIEAETS  |
| ThnA                                      | MNTNGSNSS    | V           | FPRQ      | PQGDQSS   | AVRRAN     | QIQRQSC   |
| Proteobacteria_bacterium_DOLZORAL124_45_7 | MDVFN        | NNR         | V         | LPRQ      | PD         | QIQT      |
| T._eikelboomii_ATCC_49788                 | MDIQ         | TRR         | QNT       | I         | LPRQ       | PD        |
| T._sp_Bin_8_c_000000059211                | MDIQ         | TRR         | QNT       | I         | LPRQ       | PD        |
| T._caldifontis_DSM_21228                  | MDIQ         | SRNK        | ANTSPV    | LPRS      |            |           |
| T._fructosivorans_ATCC_49748              | MDIQ         | SRNK        | ANTSPV    | LPRS      |            |           |

**Supplementary Figure S3.** Multiple sequence alignment of PcpY, PlpY, and leader sequences of type III spliceotides.<sup>1</sup> Sequences were aligned with MUSCLE in Geneious 7.1.9 and the alignment image was generated using ESPrnt 3.0.<sup>7</sup>

|                                     | 1      | 10           | 20    | 30   | 40            | 50           |             |
|-------------------------------------|--------|--------------|-------|------|---------------|--------------|-------------|
| pCDF-6xH-PcpY_translation           | .MVENI | DNEREKSANEIE | PESL  | LLP  | QAWQSQIAYLKAI | LKARQALDRIEK | .RYLR       |
| pRSFDuet-1_PlpXY_-_PlpY_translation | MNSNQI | PNKVATAAQKSD | DSSSV | LP   | QGWQDKQAFIKAL | IKARQSL      | ETAEIS.NFLT |
| C._ferrugineus_Cbfe23               | .MITK  | TEKKF        | ..... | PRND | VLD           | RQOS         | .....       |
| CyiA                                | .MITK  | TEKKF        | ..... | PRTE | ILD           | RLLS         | .....       |
| C._fuscus_DSM_2262                  | .MITK  | TEKKF        | ..... | PRTE | I             | LNR          | QOS         |
| A._violaceum_SDU8                   | MNKT   | E            | KP    | V    | F             | .....        | PRTE        |
| C._fuscus_DSM_2262                  | .MITK  | VEKKL        | ..... | PRTE | Q             | V            | I           |
| CyrA                                | .MITK  | VEKKL        | ..... | PRTE | Q             | V            | I           |
| A._violaceum_Cb_vi76                | .MMK   | SEKKF        | ..... | PRTE | Q             | V            | I           |
| AreA                                | .MTE   | KTEKKF       | ..... | PRTE | Q             | V            | I           |
| ArdA                                | .MIK   | VEKKF        | ..... | PRTE | Q             | V            | I           |
| A._gephyra_DSM_2261                 | .MIK   | VEKKF        | ..... | PRTE | Q             | V            | I           |
| A._violaceum_Cb_vi76                | ..MK   | VEKKF        | ..... | PRTE | Q             | V            | I           |
| A._primigenium_ATCC_29037           | .MIK   | TEKKF        | ..... | PRTE | Q             | V            | I           |
| A._gephyra_DSM_2261                 | .MIT   | VEKKF        | ..... | PRTE | Q             | V            | I           |
| M._boletus_DSM_14713                | .MIT   | VEKKF        | ..... | PRTE | Q             | V            | I           |
| ArkA                                | ..MT   | VEKKF        | ..... | PRTE | Q             | V            | I           |
| A._violaceum_Cb_vi76                | .MMT   | VEKKF        | ..... | PRTE | Q             | V            | I           |
| A._violaceum_Cb_vi76                | ..MT   | VEKKF        | ..... | PRTE | Q             | V            | I           |

**Supplementary Figure S4.** Multiple alignment of PcpY, PlpY, and leader sequences of type V spliceotides.<sup>1</sup> Sequences were aligned with MUSCLE in Geneious 7.1.9 and the alignment image was generated using ESPrnt 3.0.<sup>7</sup>

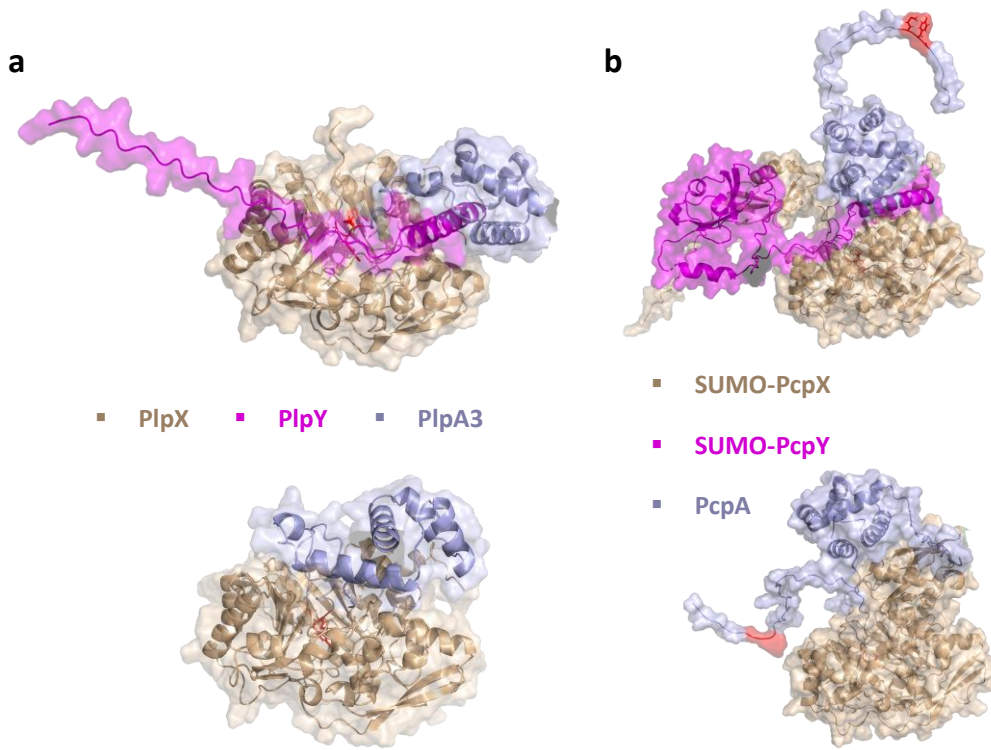

**Supplementary Figure S5.** a) AlphaFold model of PlpA3 and PlpX in the presence (top) and absence (bottom) of PlpY. Without PlpY, the binding helix is not replaced by PlpA3. a) AlphaFold model of PcpA and PcpX in the presence (top) and absence (bottom) of PcpY. Without PcpY, the binding helix is not replaced by PcpA.

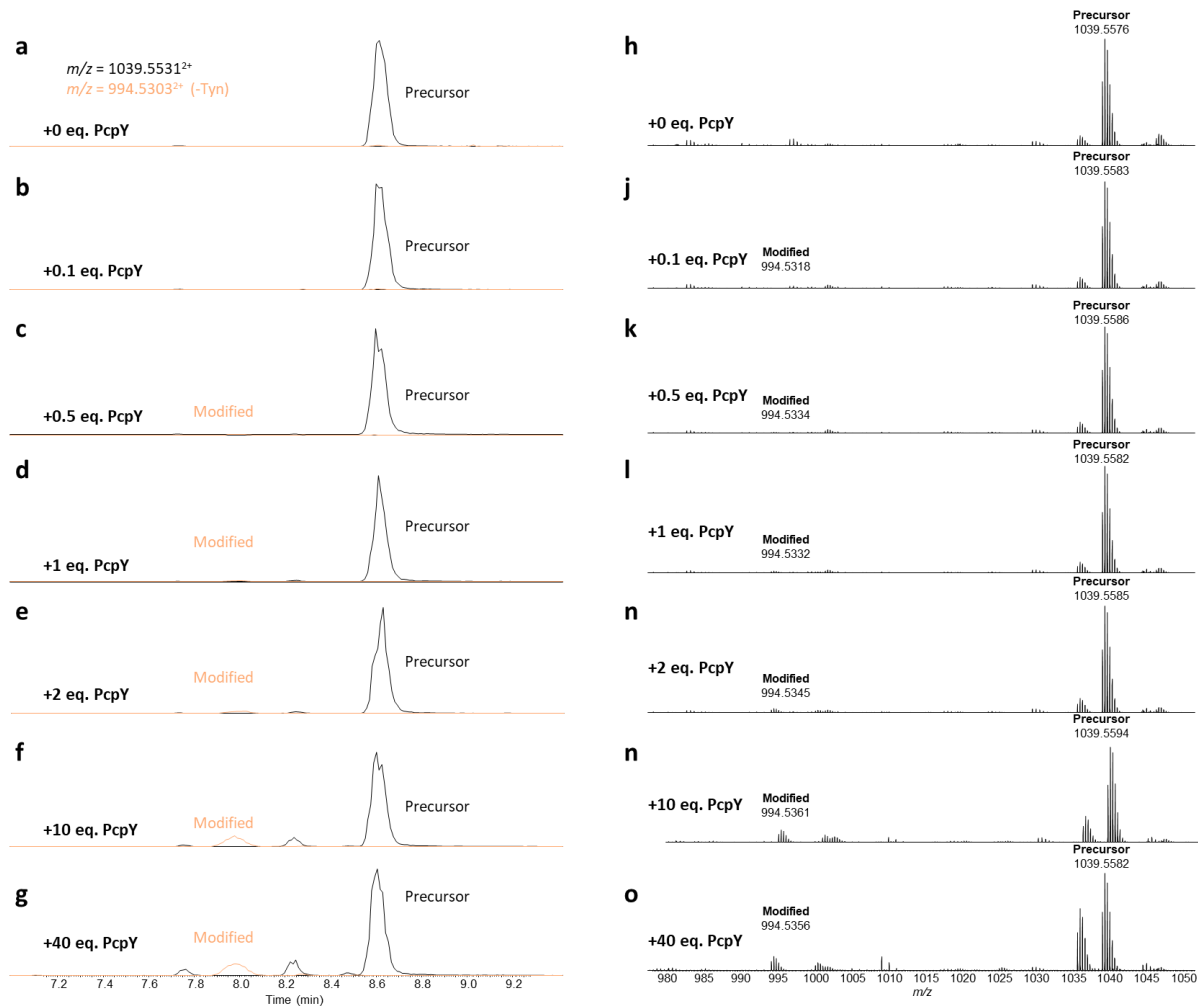

**Supplementary Figure S6.** LC-MS analysis for His<sub>6</sub>-PcpA cleaved with trypsin and GluC to give the peptide fragment LVTAVGGVTGGSGIYGPIQAMYGAVVGDPKPGK. Extracted ion chromatograms for  $m/z$  1039.5531 (precursor,  $[M+3H]^{3+}$ ),  $m/z$  994.5303 (modified,  $[M+3H]^{3+}$ ) for *in vitro* enzymatic reactions of His<sub>6</sub>-PcpA and SUMO-PcpX with 0 (a), 0.1 (b), 0.5 (c), 1 (d), 2 (e), 10 (f), or 40 (g) equivalents SUMO-PcpY. Extracted mass spectra for *in vitro* enzymatic reactions of His<sub>6</sub>-PcpA and SUMO-PcpX with 0 (h), 0.1 (j), 0.5 (k), 1 (l), 2 (m), 10 (n), or 40 (o) equivalents SUMO-PcpY. "Modified" refers to excision of tyramine ( $-C_8H_9NO$ ).

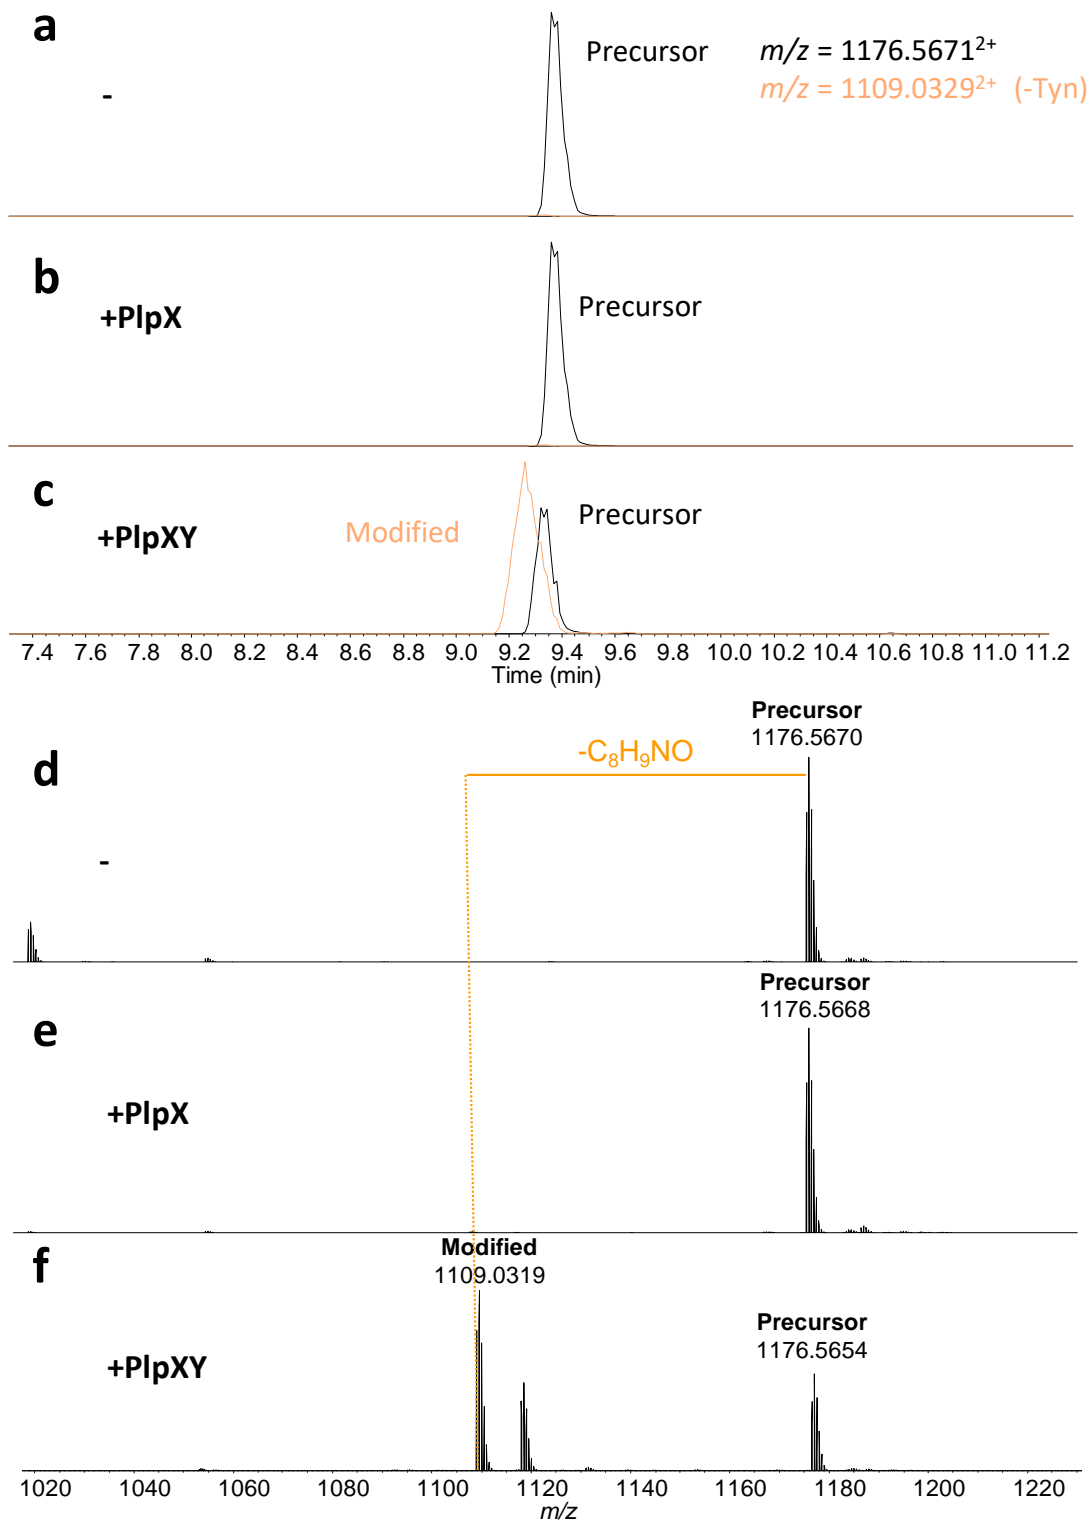

**Supplementary Figure S7.** LC-MS analysis for His<sub>6</sub>-PlpA3 cleaved with trypsin to give the peptide fragment AVAAMYGVVFPWDNEFPWPR. Extracted ion chromatograms for  $m/z$  1176.5671 (precursor,  $[M+2H]^{2+}$ ),  $m/z$  1109.0329 (modified,  $[M+2H]^{2+}$ ) for **a**) precursor only expression, **b**) precursor + PlpX co-expression, and **c**) precursor + PlpXY co-expression. Extracted mass spectra for **d**) precursor only expression, **e**) precursor + PlpX co-expression, and **f**) precursor + PlpXY co-expression. "Modified" refers to excision of tyramine ( $-C_8H_9NO$ ).



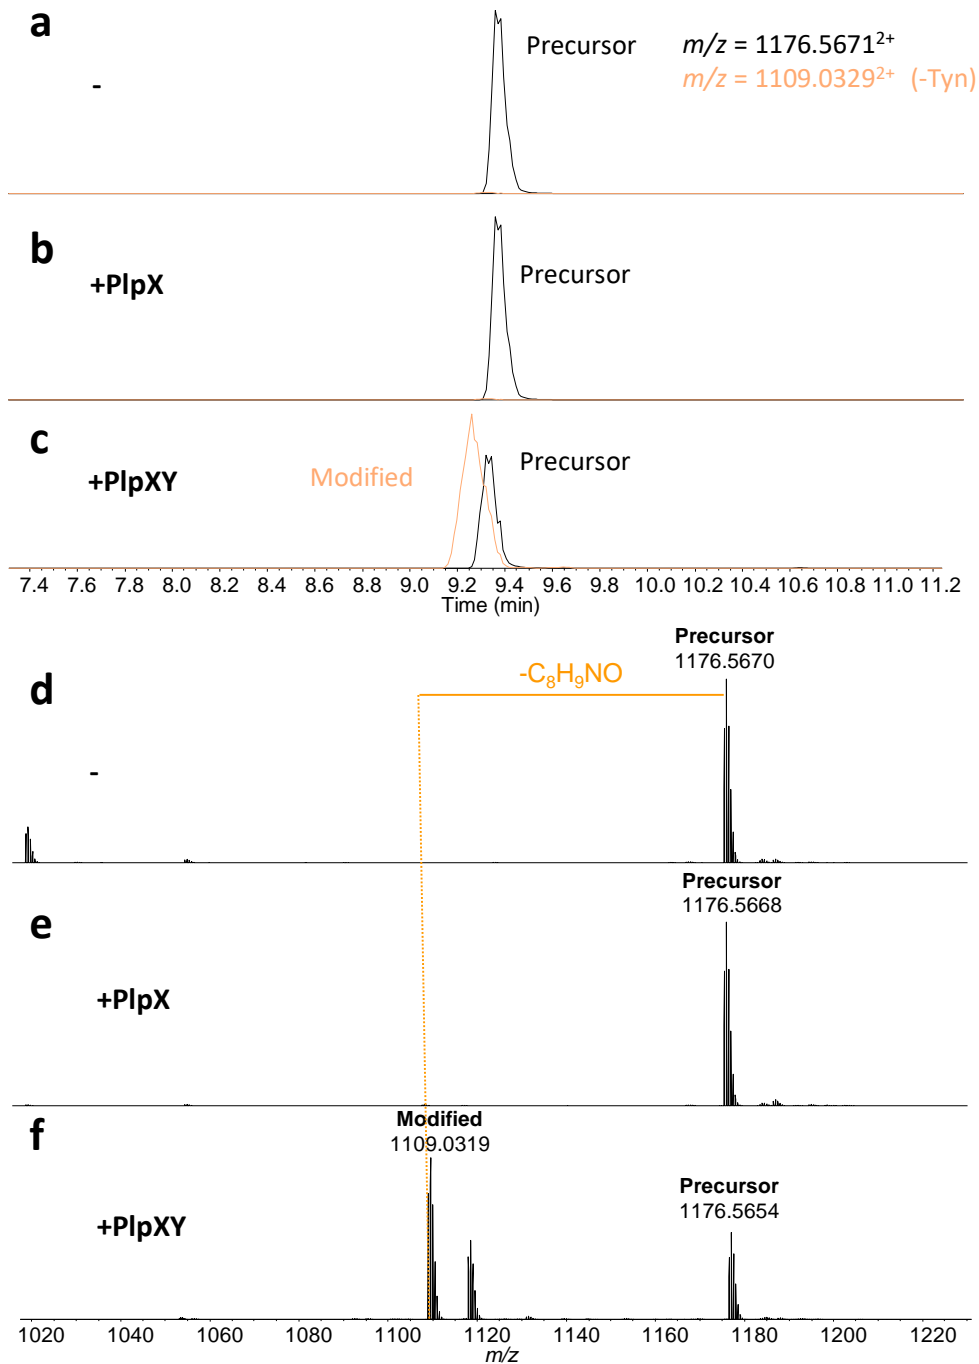

**Supplementary Figure S8.** LC-MS analysis for His<sub>6</sub>-PlpA3-33 cleaved with trypsin to give the peptide fragment AVAAMYGVVFPWDNEFPWPR. Extracted ion chromatograms for  $m/z$  1176.5671 (precursor, [M+2H]<sup>2+</sup>),  $m/z$  1109.0329 (modified, [M+2H]<sup>2+</sup>) for **a**) precursor only expression, **b**) precursor + PlpX co-expression, and **c**) precursor + PlpXY co-expression. Extracted mass spectra for **d**) precursor only expression, **e**) precursor + PlpX co-expression, and **f**) precursor + PlpXY co-expression. "Modified" refers to excision of tyramine ( $-C_8H_9NO$ ).

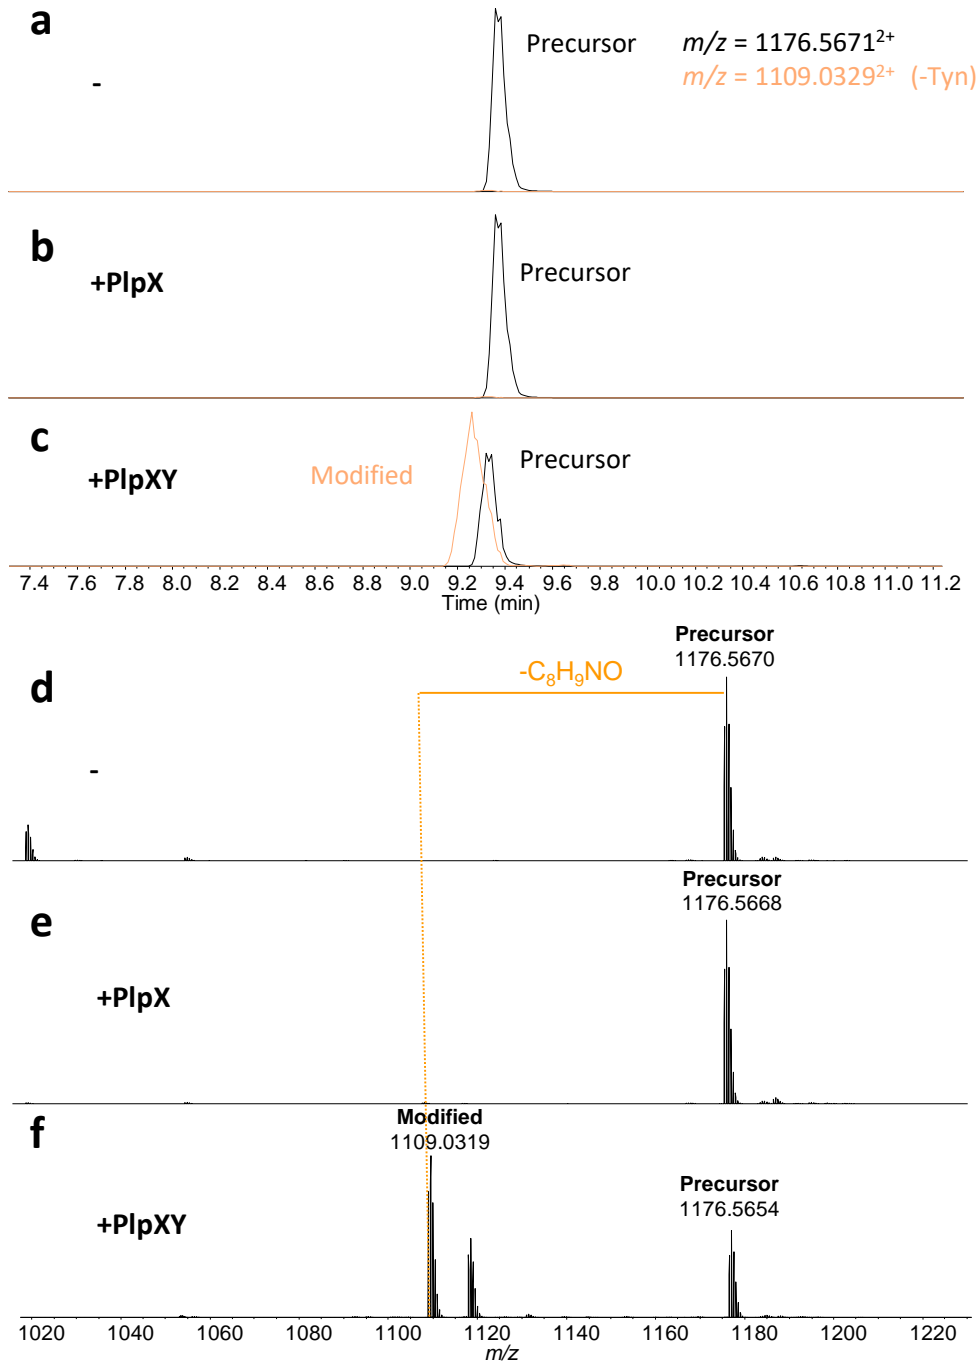

**Supplementary Figure S9.** LC-MS analysis for His<sub>6</sub>-PlpA3-45 cleaved with trypsin to give the peptide fragment AVAAMYGVVFPWDNEFPWPR. Extracted ion chromatograms for  $m/z$  1176.5671 (precursor, [M+2H]<sup>2+</sup>),  $m/z$  1109.0329 (modified, [M+2H]<sup>2+</sup>) for **a**) precursor only expression, **b**) precursor + PlpX co-expression, and **c**) precursor + PlpXY co-expression. Extracted mass spectra for **d**) precursor only expression, **e**) precursor + PlpX co-expression, and **f**) precursor + PlpXY co-expression. "Modified" refers to excision of tyramine (-C<sub>8</sub>H<sub>9</sub>NO).

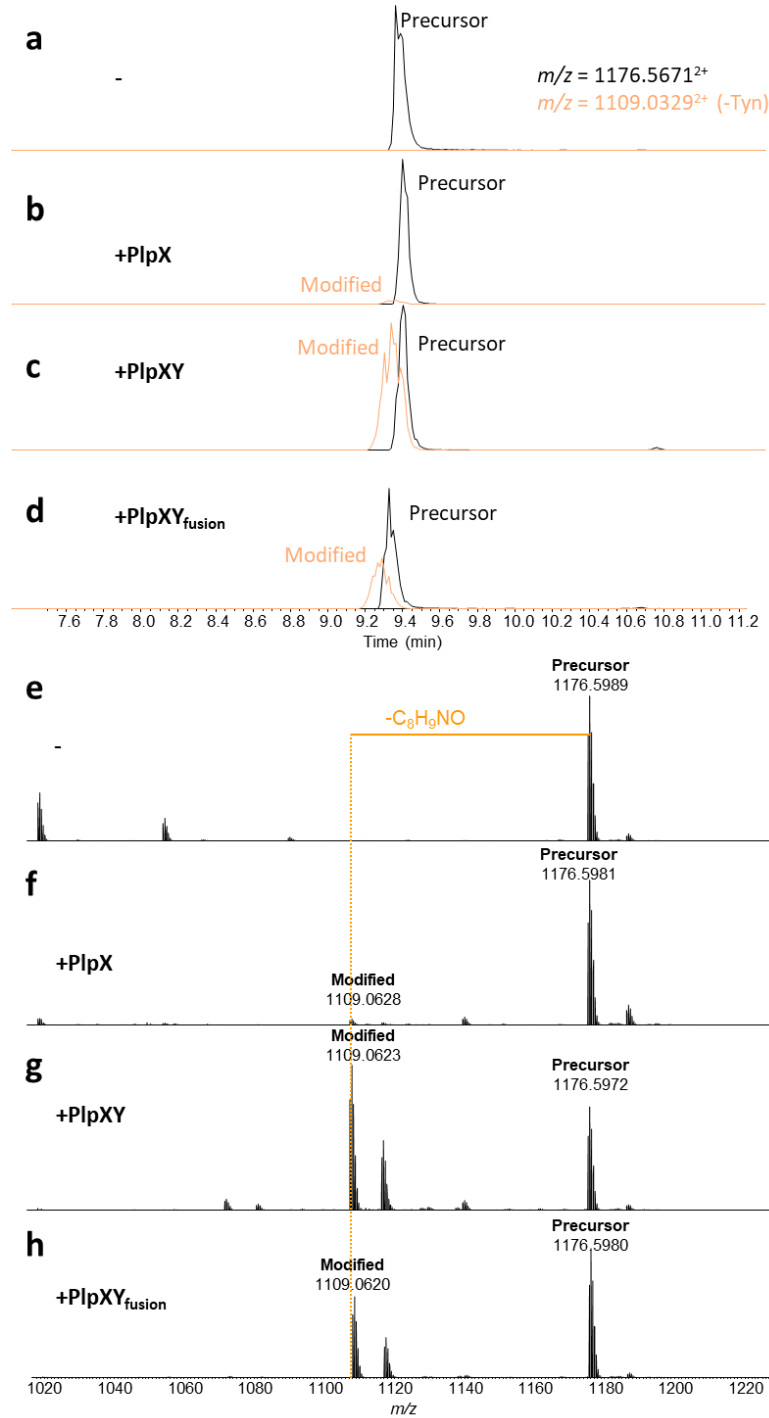

**Supplementary Figure S10.** LC-MS analysis for His<sub>6</sub>-PlpA3 cleaved with trypsin to give the peptide fragment AVAAMYGVVFPWDNEFPWPR. Extracted ion chromatograms for  $m/z$  1176.5671 (precursor, [M+2H]<sup>2+</sup>),  $m/z$  1109.0329 (modified, [M+2H]<sup>2+</sup>) for **a**) precursor only expression, **b**) precursor + PlpX co-expression, **c**) precursor + PlpXY co-expression, and **d**) precursor + PlpXY<sub>fusion</sub> co-expression. Extracted mass spectra for **e**) precursor only expression, **f**) precursor + PlpX co-expression, **g**) precursor + PlpXY co-expression, and **h**) precursor + PlpXY<sub>fusion</sub> co-expression. "Modified" refers to excision of tyramine (-C<sub>8</sub>H<sub>9</sub>NO).

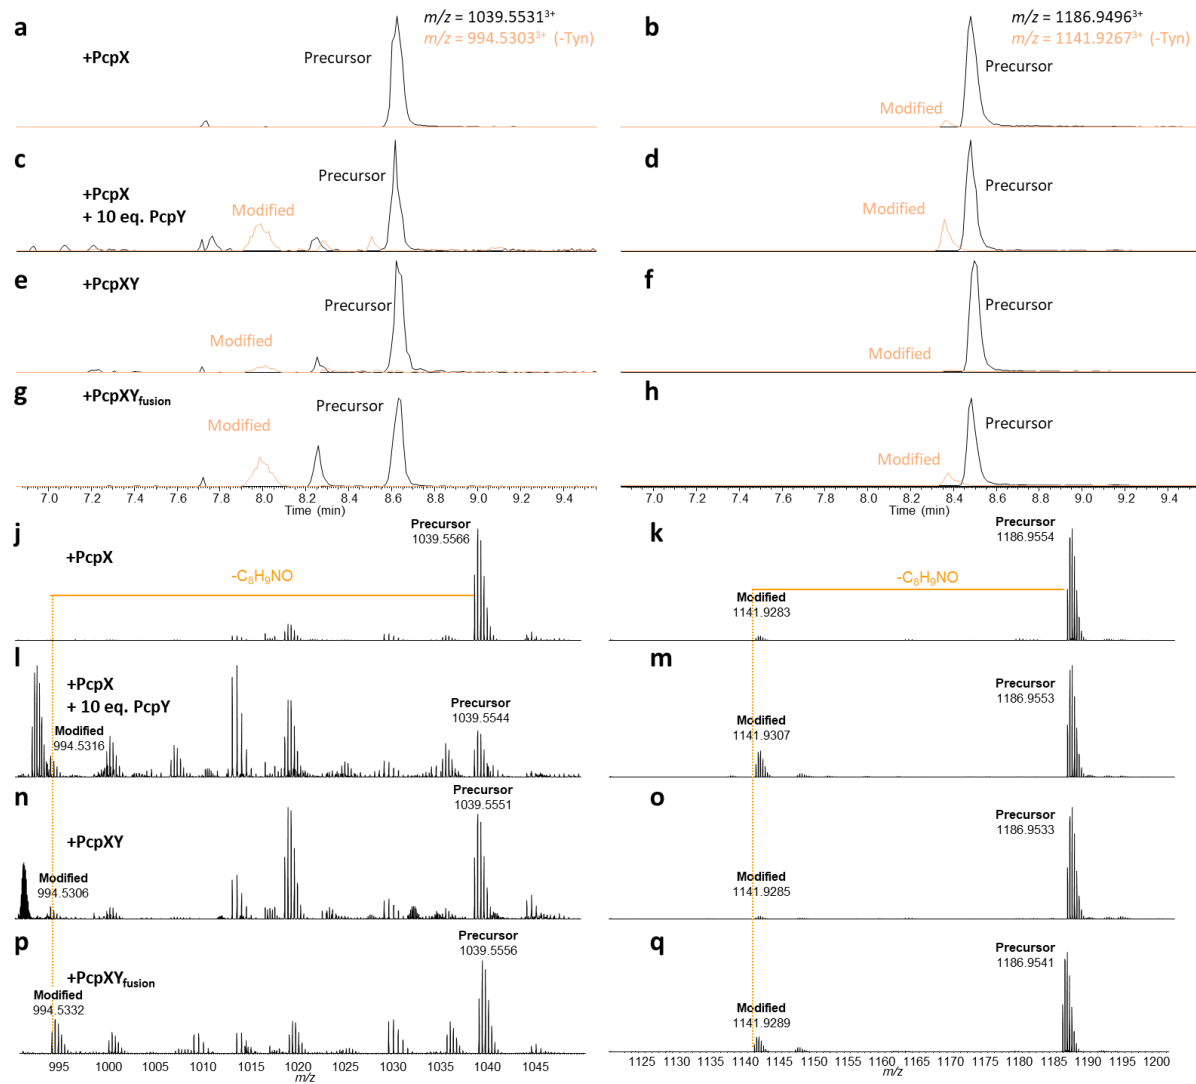

**Supplementary Figure S11.** LC-MS analysis for His<sub>6</sub>-PcpA cleaved with trypsin and GluC to give the peptide fragment LVTAVGGVTGGSGIYGPIQAMYGA VVGDPKPGK (a, c, e, h, j, l, n, p) or FPSPLPKPSPIPSPWKPPVDVQPMYGVVSNDS (b, d, f, h, k, m, o, q). Extracted ion chromatograms for:  $m/z$  1039.5531 (precursor,  $[M+3H]^{3+}$ ),  $m/z$  994.5303 (modified,  $[M+3H]^{3+}$ ), (a, c, e, g, j, l, n, p); or  $m/z$  1186.9496 (precursor,  $[M+3H]^{3+}$ ),  $m/z$  1141.9267.5303 (modified,  $[M+3H]^{3+}$ ) (b, d, f, h, k, m, o, q) for *in vitro* enzymatic reactions of His<sub>6</sub>-PcpA and SUMO-PcpX (a, b), SUMO-PcpX + 10 eq. SUMO-PcpY (c, d), SUMO-PcpXY (e, f), or PcpXY<sub>fusion</sub> (g, h). Extracted mass spectra for *in vitro* enzymatic reactions of His<sub>6</sub>-PcpA and SUMO-PcpX (j, k), SUMO-PcpX + 10 eq. SUMO-PcpY (l, m), SUMO-PcpXY (n, o), or PcpXY<sub>fusion</sub> (p, q). "Modified" refers to excision of tyramine ( $-C_8H_9NO$ ).

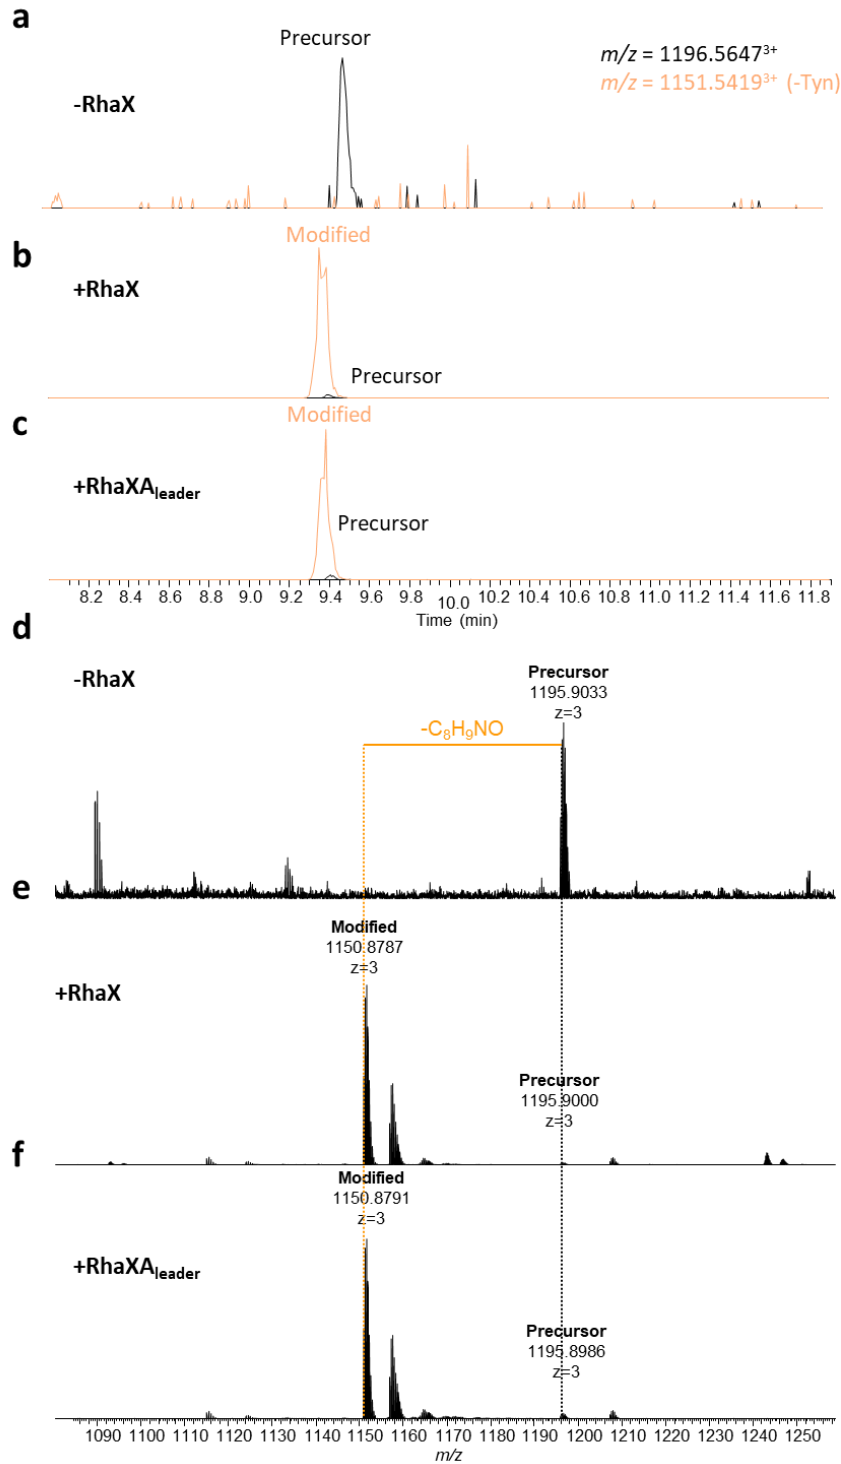

**Supplementary Figure S12.** LC-MS analysis for His<sub>6</sub>-RhaA cleaved with trypsin to give the peptide fragment IDSSVFTHCDDFFVCGVALYGSVIDPHRFDMPLP. Extracted ion chromatograms for  $m/z$  1196.5647 (precursor, [M+3H]<sup>3+</sup>),  $m/z$  1151.5419 (modified, [M+3H]<sup>3+</sup>) for **a**) precursor only expression, **b**) precursor + RhaX co-expression, **c**) precursor + RhaX<sub>leader</sub> co-expression. Extracted mass spectra for **d**) precursor only expression, **e**) precursor + RhaX co-expression, **f**) precursor + RhaX<sub>leader</sub> co-expression. "Modified" refers to excision of tyramine (-C<sub>8</sub>H<sub>9</sub>NO).

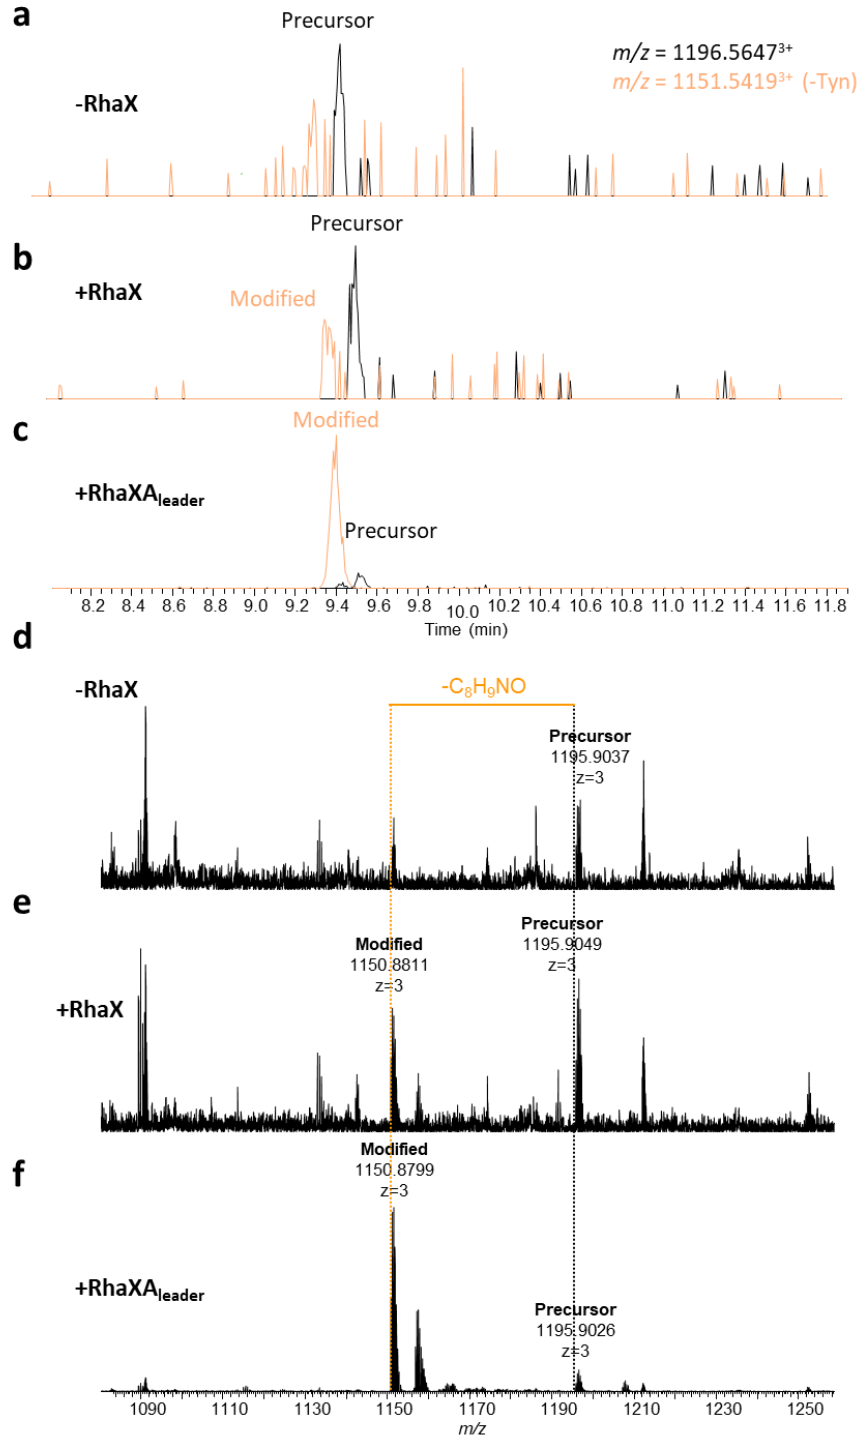

**Supplementary Figure S13.** LC-MS analysis for His<sub>6</sub>-SUMO-RhaA<sub>core</sub> cleaved with trypsin to give the peptide fragment IDSSVFTHCDFVCGVALYGSVIDPHRFDMLP. Extracted ion chromatograms for  $m/z$  1196.5647 (precursor, [M+3H]<sup>3+</sup>),  $m/z$  1151.5419 (modified, [M+3H]<sup>3+</sup>) for **a**) precursor only expression, **b**) precursor + RhaX co-expression, **c**) precursor + RhaXA<sub>leader</sub> co-expression. Extracted mass spectra for **d**) precursor only expression, **e**) precursor + RhaX co-expression, **f**) precursor + RhaXA<sub>leader</sub> co-expression. "Modified" refers to excision of tyramine (-C<sub>8</sub>H<sub>9</sub>NO).

**a**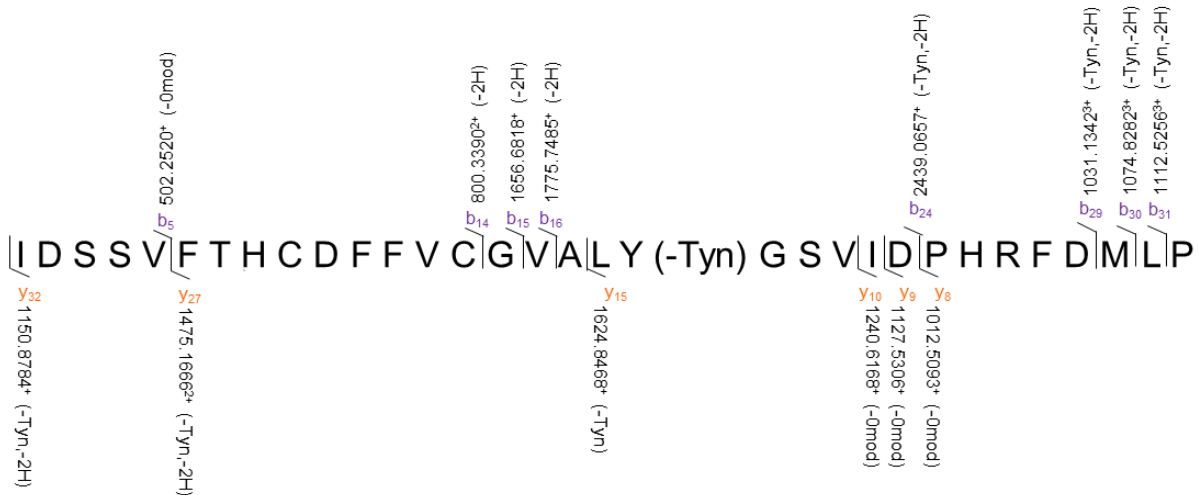**b**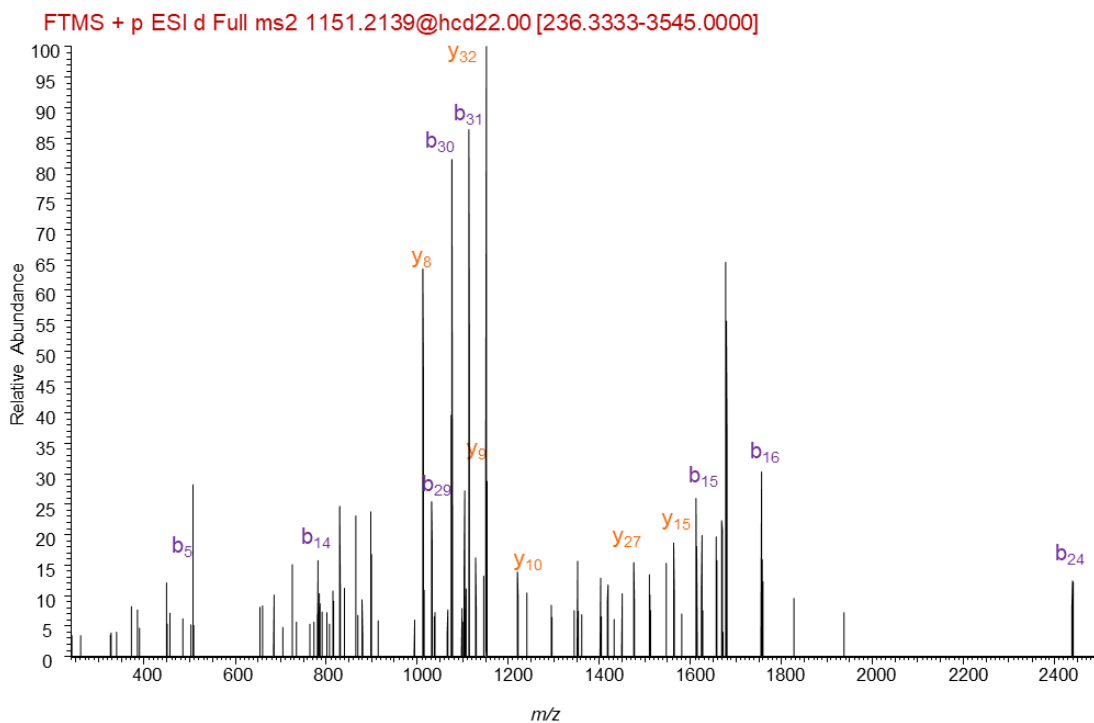

**Supplementary Figure S14.** Localization of C<sub>8</sub>H<sub>9</sub>NO loss from His<sub>6</sub>-SUMO-RhaA<sub>core</sub> cleaved with trypsin to give the peptide fragment IDSSVFTHCDFVCGVALYGSVIDP HRFDM L P. **a)** Summary of observed b (above, purple) and y (below, orange) fragmentation ions. **b)** MS/MS spectrum from parallel reaction monitoring (PRM)-mediated fragmentation (CE 22) from m/z 1151.2139 ([M+3H]<sup>3+</sup>) parent ion. Observed b and y ions are indicated as before.

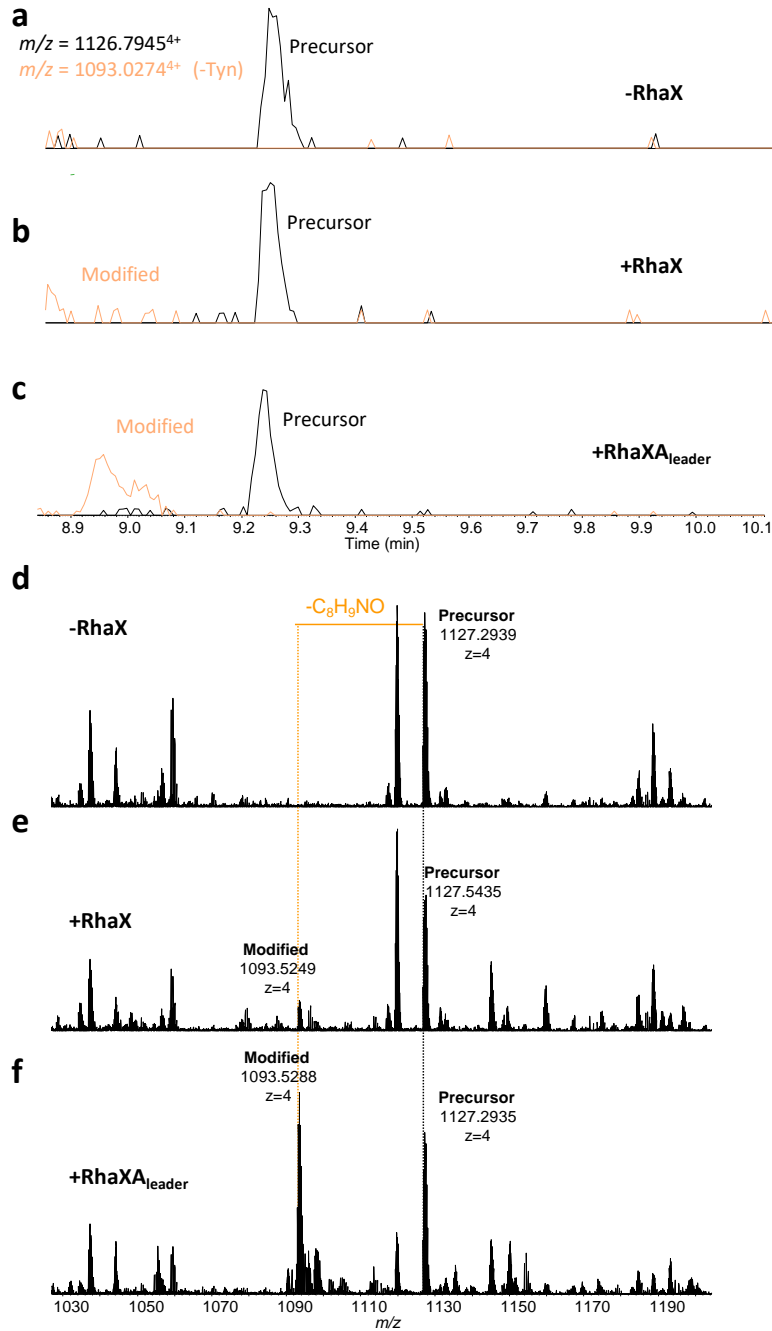

**Supplementary Figure S15.** LC-MS analysis for His<sub>6</sub>-mCherry209-RhaA<sub>core</sub> cleaved with trypsin to give the peptide fragment IDSSVFTHCDDFFVCGVALYGSVIDPHRFDMLPGGAYNVNIK. Extracted ion chromatograms for  $m/z$  1126.7945 (precursor, [M+4H]<sup>4+</sup>),  $m/z$  1093.0274 (modified, [M+4H]<sup>4+</sup>) for **a**) precursor only expression, **b**) precursor + RhaX co-expression, **c**) precursor + RhaX<sub>leader</sub> co-expression. Extracted mass spectra for **d**) precursor only expression, **e**) precursor + RhaX co-expression, **f**) precursor + RhaX<sub>leader</sub> co-expression. "Modified" refers to excision of tyramine (-C<sub>8</sub>H<sub>9</sub>NO).



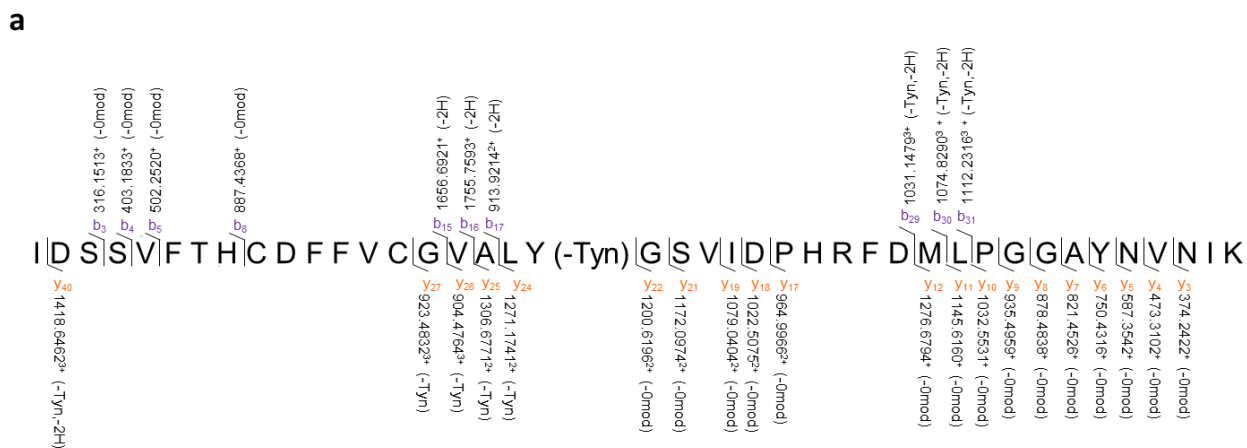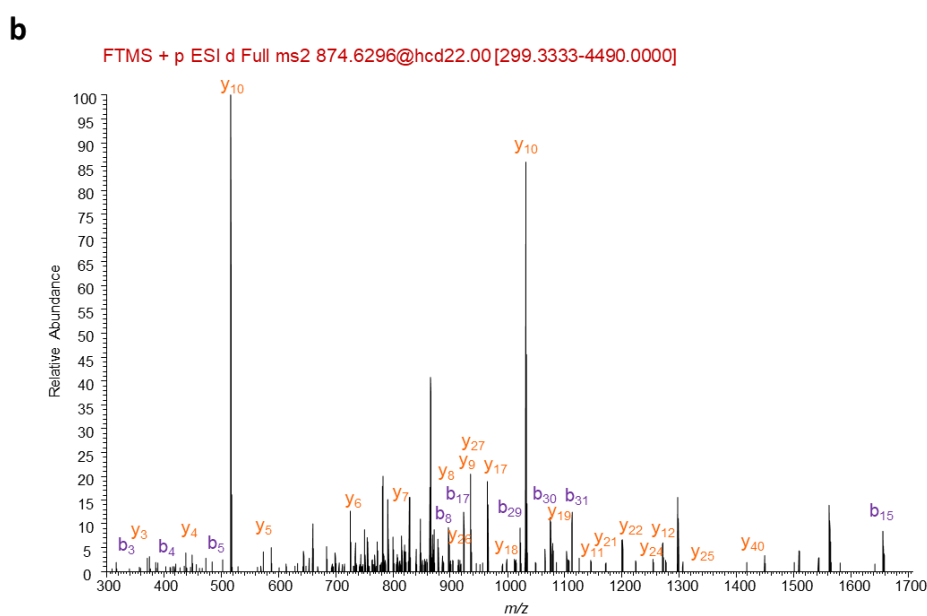

**Supplementary Figure S16.** Localization of C<sub>8</sub>H<sub>9</sub>NO loss from His<sub>6</sub>-mCherry209-RhaA<sub>core</sub> cleaved with trypsin to give the peptide fragment DSSVFTHCDFVCGVALYGSVIDPHRFDMPLPGGAYNVNIK. **a**) Summary of observed b (above, purple) and y (below, orange) fragmentation ions. **b**) MS/MS spectrum from parallel reaction monitoring (PRM)-mediated fragmentation (CE 22) from m/z 874.6296 ([M+5H]<sup>5+</sup>) parent ion. Observed b and y ions are indicated as before.

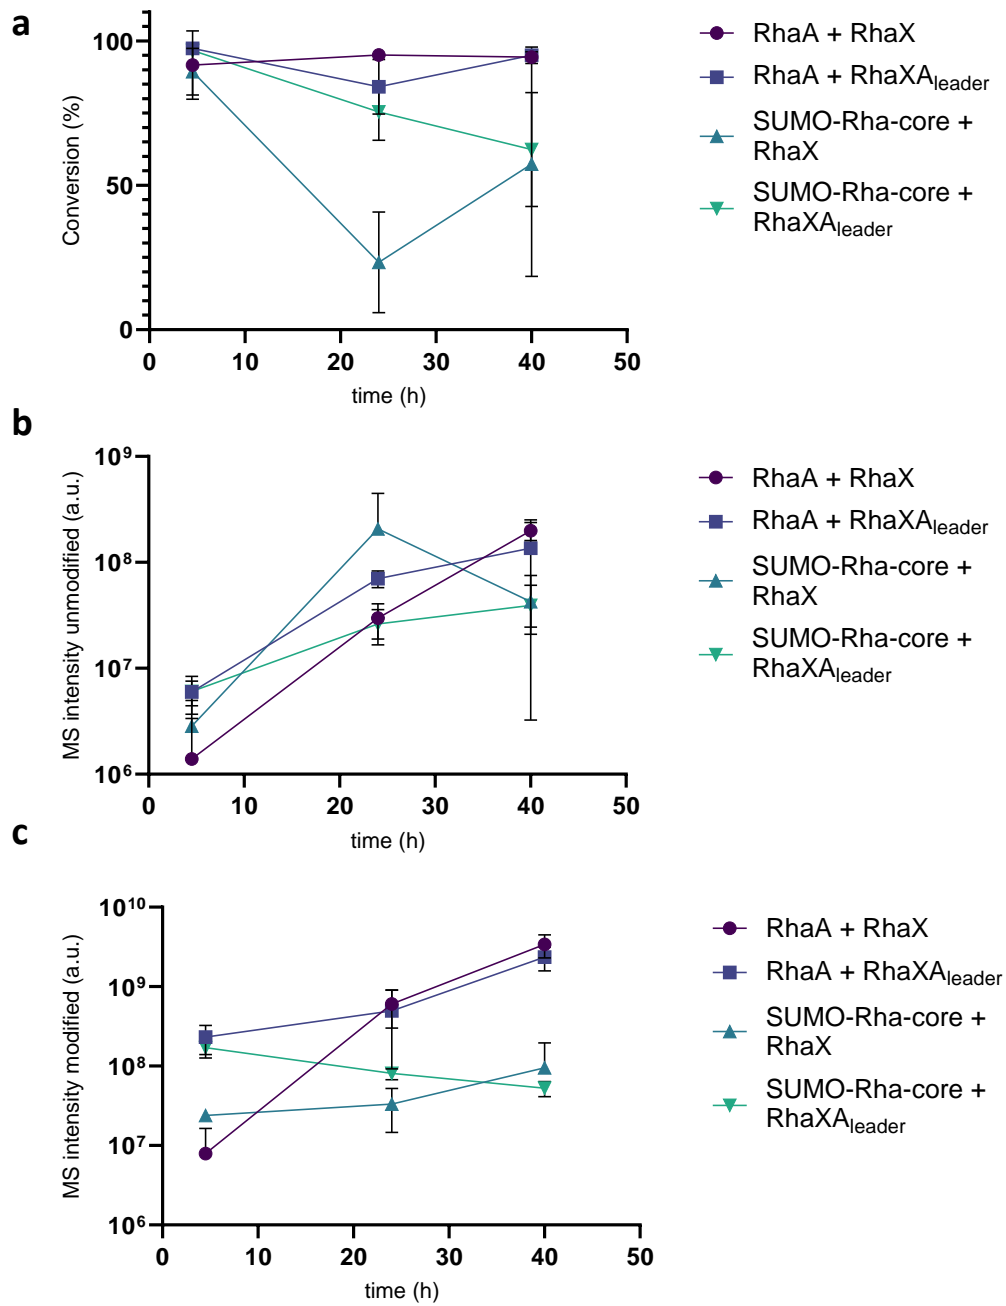

**Supplementary Figure S17.** LC-MS based conversion (a), MS intensities (logarithmic scale) of unmodified (b,  $m/z$  1196.5647  $[M+3H]^{3+}$ ), and modified (c,  $m/z$  1151.5419  $[M+3H]^{3+}$ ) tryptic peptide fragments of expressions of His<sub>6</sub>-RhaA or His<sub>6</sub>-SUMO-RhaAcore with RhaX or RhaXA<sub>leader</sub> purified at 4.5 h, 24 h, and 48 h after induction

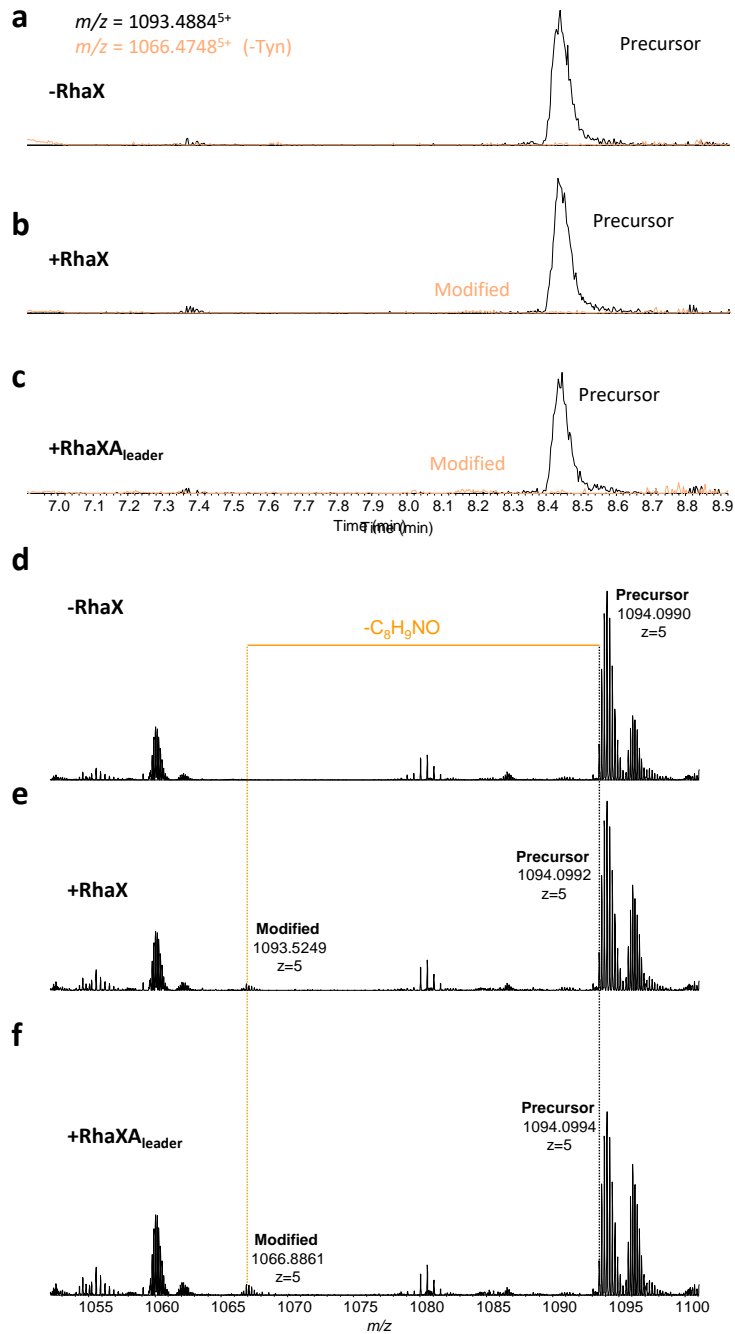

**Supplementary Figure S18.** LC-MS analysis for His<sub>6</sub>-DHFR118-RhaA<sub>core</sub> cleaved with trypsin to give the peptide fragment IDSSVFTHCDDFFVCGVALYG SVIDPHRFDMLPGDTHYPDYEPDDWER. **a)** Extracted ion chromatograms for  $m/z$  1093.4884 (precursor, [M+5H]<sup>5+</sup>),  $m/z$  1066.4748 (modified, [M+5H]<sup>5+</sup>) for **a)** precursor only expression, **b)** precursor + RhaX co-expression, **c)** precursor + RhaX<sub>leader</sub> co-expression. Extracted mass spectra for **d)** precursor only expression, **e)** precursor + RhaX co-expression, **f)** precursor + RhaX<sub>leader</sub> co-expression. "Modified" refers to excision of tyramine (-C<sub>8</sub>H<sub>9</sub>NO).

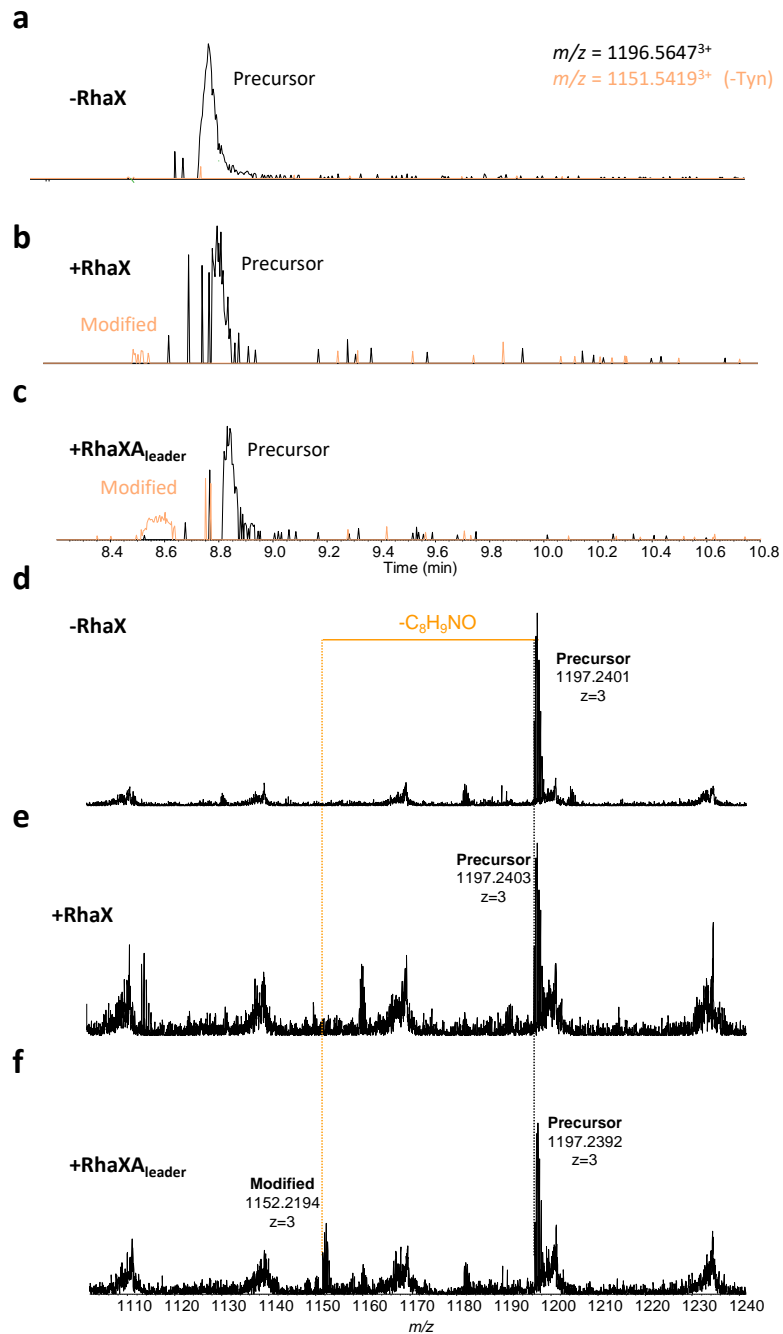

**Supplementary Figure S19.** LC-MS analysis for His<sub>6</sub>-MBP-Cterm-RhaA<sub>core</sub> cleaved with trypsin to give the peptide fragment IDSSVFTHCDFVCGVALYGSVIDPHRFDMPLP. **a)** Extracted ion chromatograms for  $m/z$  1196.5647 (precursor,  $[M+3H]^{3+}$ ),  $m/z$  1151.5419 (modified,  $[M+3H]^{3+}$ ) for **a)** precursor only expression, **b)** precursor + RhaX co-expression, **c)** precursor + RhaX<sub>leader</sub> co-expression. Extracted mass spectra for **d)** precursor only expression, **e)** precursor + RhaX co-expression, **f)** precursor + RhaX<sub>leader</sub> co-expression. "Modified" refers to excision of tyramine (-C<sub>8</sub>H<sub>9</sub>NO).

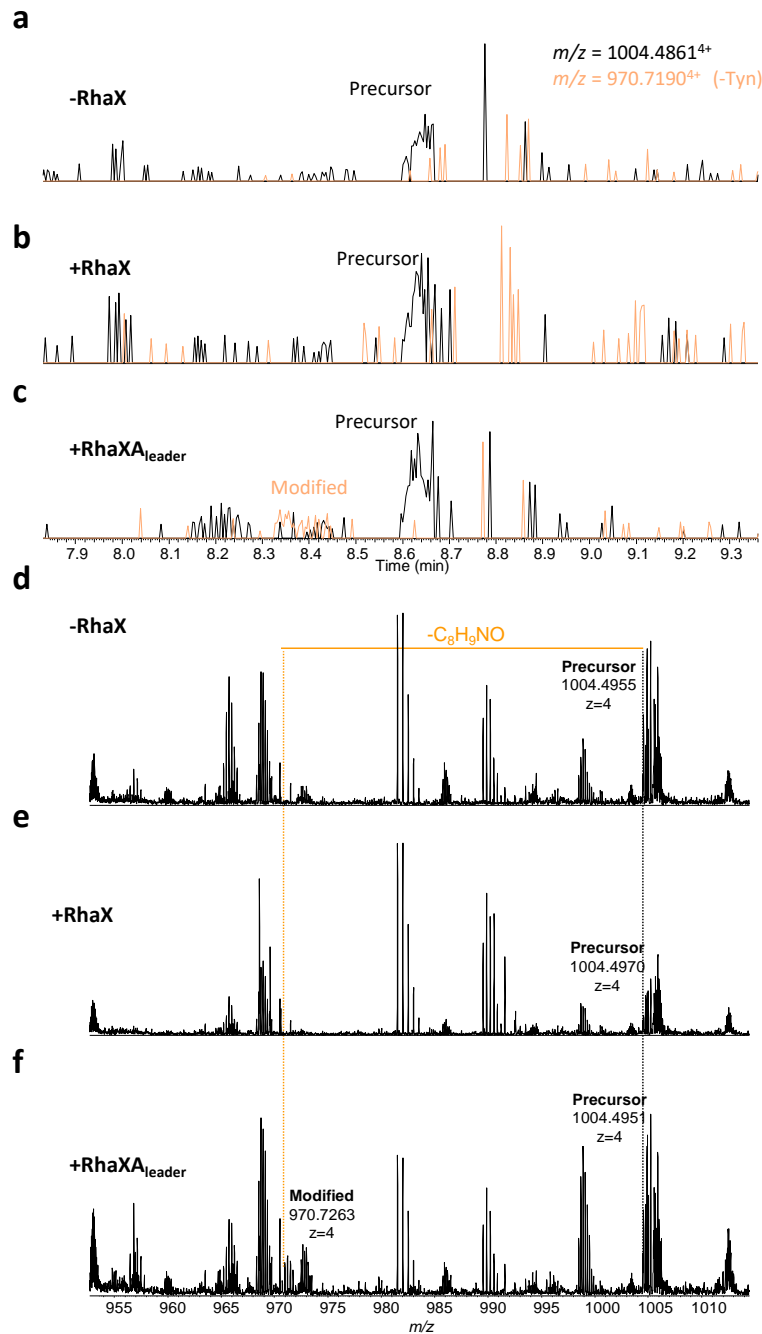

**Supplementary Figure S20.** LC-MS analysis for His<sub>6</sub>-MBP154-RhaA<sub>core</sub> cleaved with trypsin to give the peptide fragment IDSSVFTHCDDFFVCGVALYGSVIDPHRFDMLPALDKSVIDPHRFDMLP. **a)** Extracted ion chromatograms for  $m/z$  1004.4861 (precursor,  $[M+4H]^{4+}$ ),  $m/z$  970.7190 (modified,  $[M+4H]^{4+}$ ) for **a)** precursor only expression, **b)** precursor + RhaX co-expression, **c)** precursor + RhaX<sub>leader</sub> co-expression. Extracted mass spectra for **d)** precursor only expression, **e)** precursor + RhaX co-expression, **f)** precursor + RhaX<sub>leader</sub> co-expression. "Modified" refers to excision of tyramine ( $-C_8H_9NO$ ).

**a**

$m/z = 775.3734^{2+}$

$m/z = 677.8392^{2+}$  (-Tyn)

+RhaXA<sub>leader</sub>

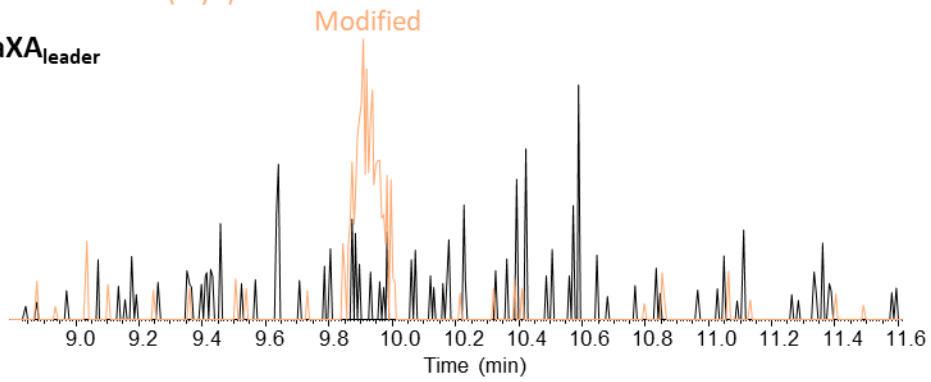

**b**

+RhaXA<sub>leader</sub>

Modified

677.8398

$z=2$

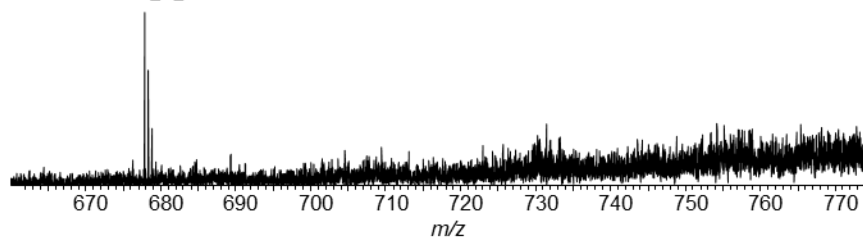

**Supplementary Figure S21.** LC-MS analysis for DHFR-Nterm-RhaA<sub>core</sub>-His<sub>6</sub> cleaved with AspN to give the peptide fragment DFFVCGVALYGSVI. **a**) Extracted ion chromatograms for  $m/z$  775.3734 (precursor,  $[M+2H]^{2+}$ ),  $m/z$  677.8392 (modified,  $[M+2H]^{2+}$ ) for precursor + RhaXA<sub>leader</sub> co-expression. **b**) Extracted mass spectra precursor + RhaXA<sub>leader</sub> co-expression. "Modified" refers to excision of tyramine ( $-C_8H_9NO$ ).

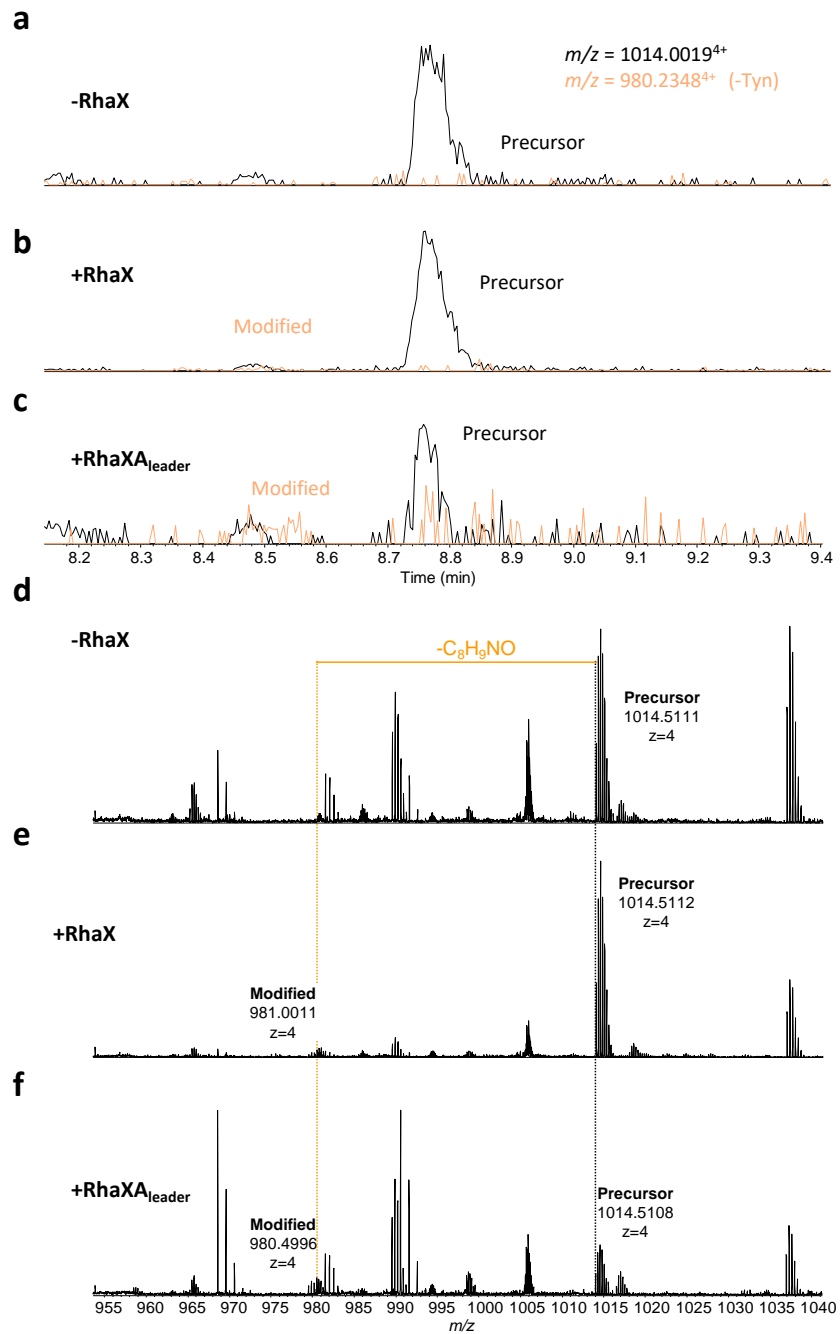

**Supplementary Figure S22.** LC-MS analysis for His<sub>6</sub>-SUMO-Nterm-RhaA<sub>core</sub> cleaved with trypsin to give the peptide fragment IDSSVFTHCDDFFVCGVALYG SVIDPHRFDMLPLVPR. **a)** Extracted ion chromatograms for  $m/z$  1014.0019 (precursor, [M+4H]<sup>4+</sup>),  $m/z$  980.2348 (modified, [M+4H]<sup>4+</sup>) for **a)** precursor only expression, **b)** precursor + RhaX co-expression, **c)** precursor + RhaX<sub>leader</sub> co-expression. Extracted mass spectra for **d)** precursor only expression, **e)** precursor + RhaX co-expression, **f)** precursor + RhaX<sub>leader</sub> co-expression. "Modified" refers to excision of tyramine (-C<sub>8</sub>H<sub>9</sub>NO).

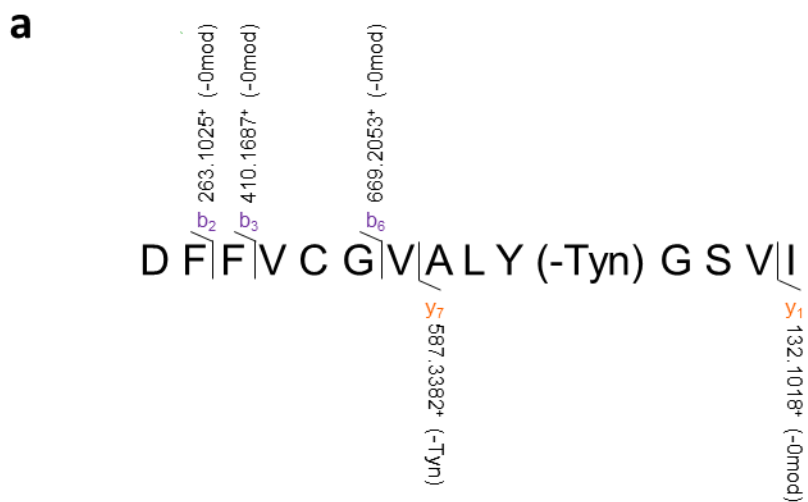

**b** FTMS + p ESI d Full ms2 677.8410@hcd22.00 [93.6667-1405.0000]

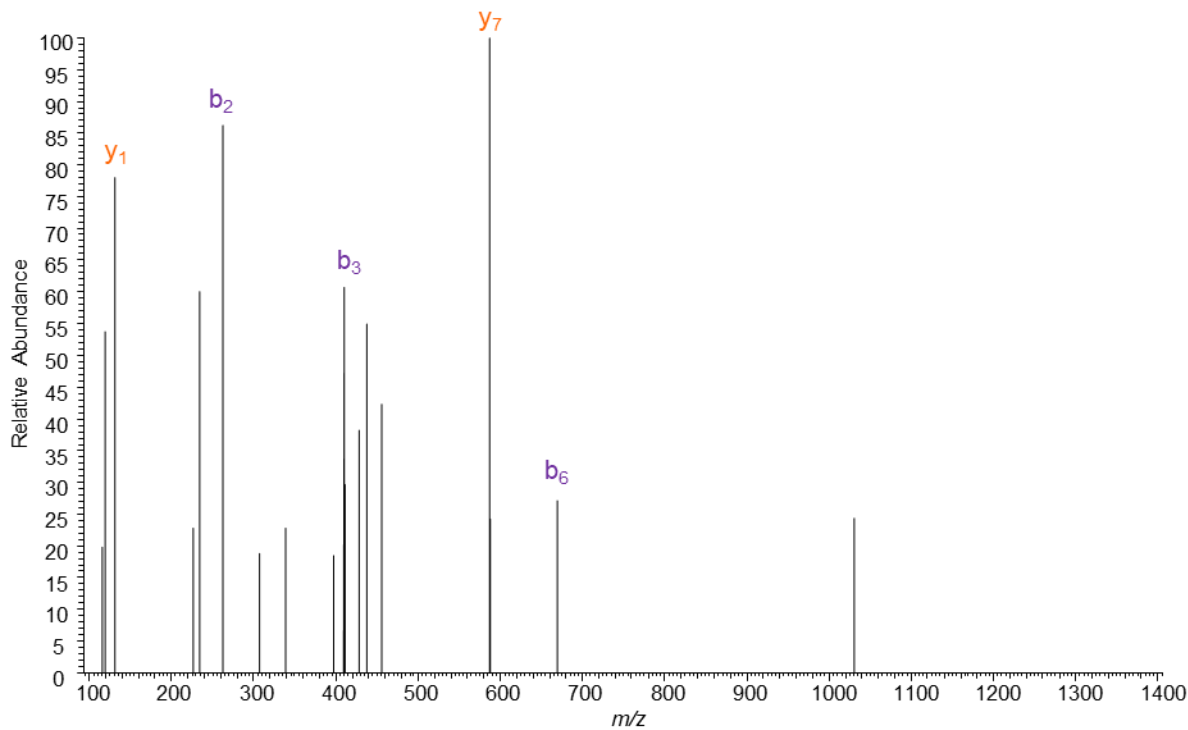

**Supplementary Figure S23.** Localization of  $C_6H_9NO$  loss from His<sub>5</sub>-MBP-Cterm-RhaA<sub>core</sub> cleaved with AspN to give the peptide fragment DFFVCGVALYGSVI. **a**) Summary of observed b (above, purple) and y (below, orange) fragmentation ions. **b**) MS/MS spectrum from parallel reaction monitoring (PRM)-mediated fragmentation (CE 22) from  $m/z$  677.8410 ( $[M+2H]^{2+}$ ) parent ion. Observed b and y ions are indicated as before.



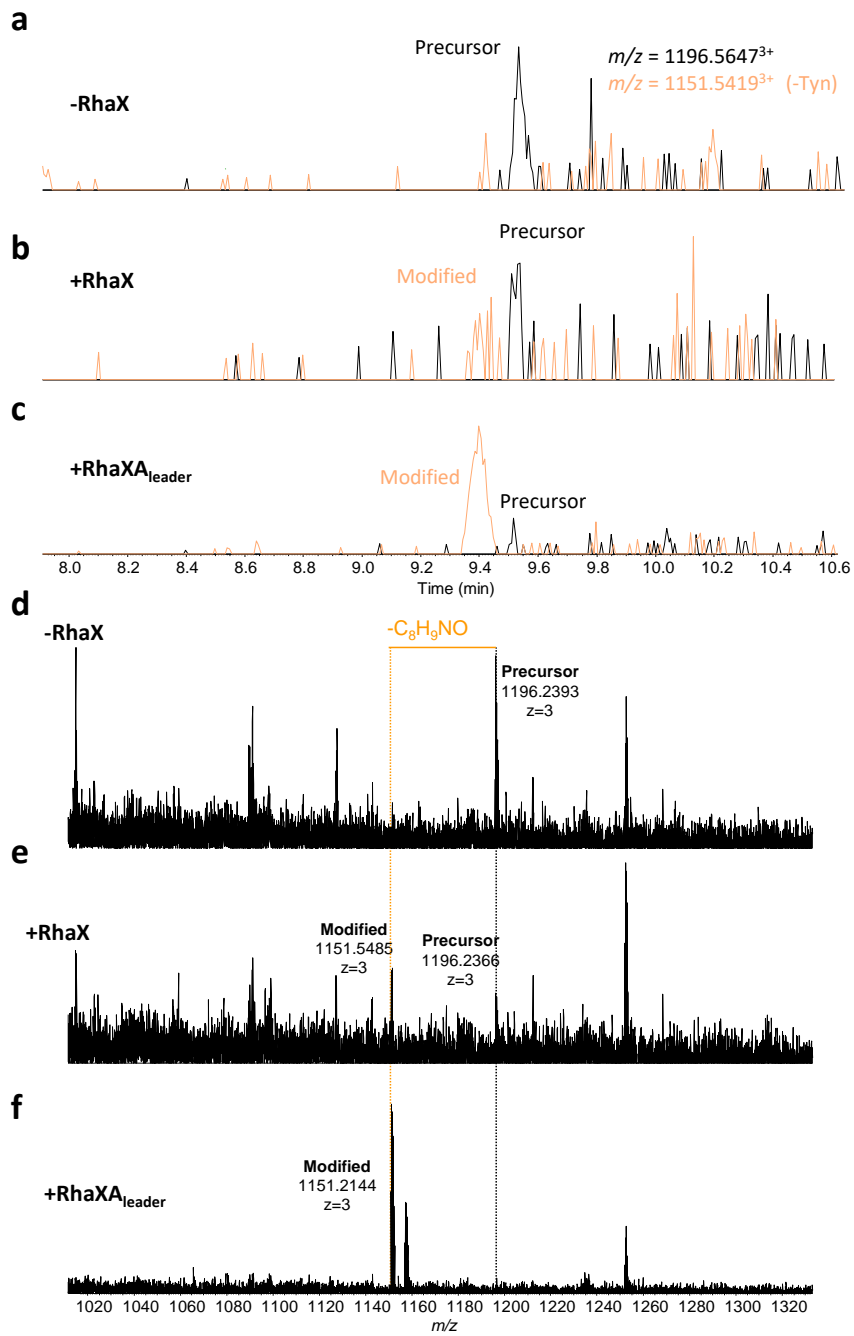

**Supplementary Figure S24.** LC-MS analysis for His<sub>6</sub>-SUMO-RhaA<sub>core</sub>-N8 cleaved with trypsin to give the peptide fragment IDSSVFTHCDFVCGVALYGSVIDPHRFDMLP. Extracted ion chromatograms for  $m/z$  1196.5647 (precursor, [M+3H]<sup>3+</sup>),  $m/z$  1151.5419 (modified, [M+3H]<sup>3+</sup>) for **a**) precursor only expression, **b**) precursor + RhaX co-expression, **c**) precursor + RhaXA<sub>leader</sub> co-expression. Extracted mass spectra for **d**) precursor only expression, **e**) precursor + RhaX co-expression, **f**) precursor + RhaXA<sub>leader</sub> co-expression. "Modified" refers to excision of tyramine (-C<sub>8</sub>H<sub>9</sub>NO).

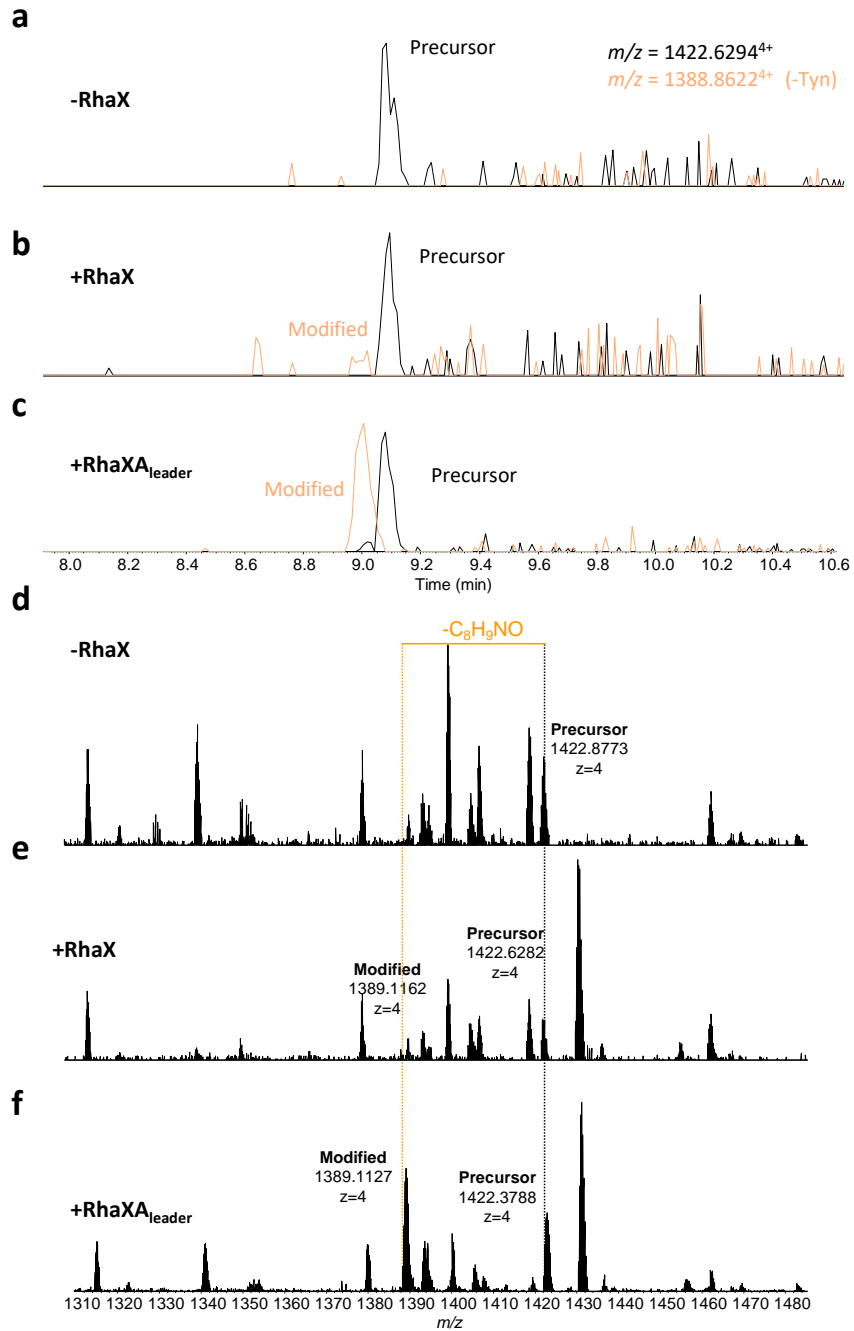

**Supplementary Figure S25.** LC-MS analysis for His<sub>6</sub>-SUMO-RhaA<sub>core</sub>-N24 cleaved with trypsin to give the peptide fragment AEQTPDELEMEDGDEIDAMLHQTGGHHCDFVCGVALYGSVIDPHRFDMPLP. Extracted ion chromatograms for  $m/z$  1422.6294 (precursor, [M+4H]<sup>4+</sup>),  $m/z$  1388.8622 (modified, [M+4H]<sup>4+</sup>) for **a**) precursor only expression, **b**) precursor + RhaX co-expression, **c**) precursor + RhaX<sub>leader</sub> co-expression. Extracted mass spectra for **d**) precursor only expression, **e**) precursor + RhaX co-expression, **f**) precursor + RhaX<sub>leader</sub> co-expression. "Modified" refers to excision of tyramine (-C<sub>8</sub>H<sub>9</sub>NO).

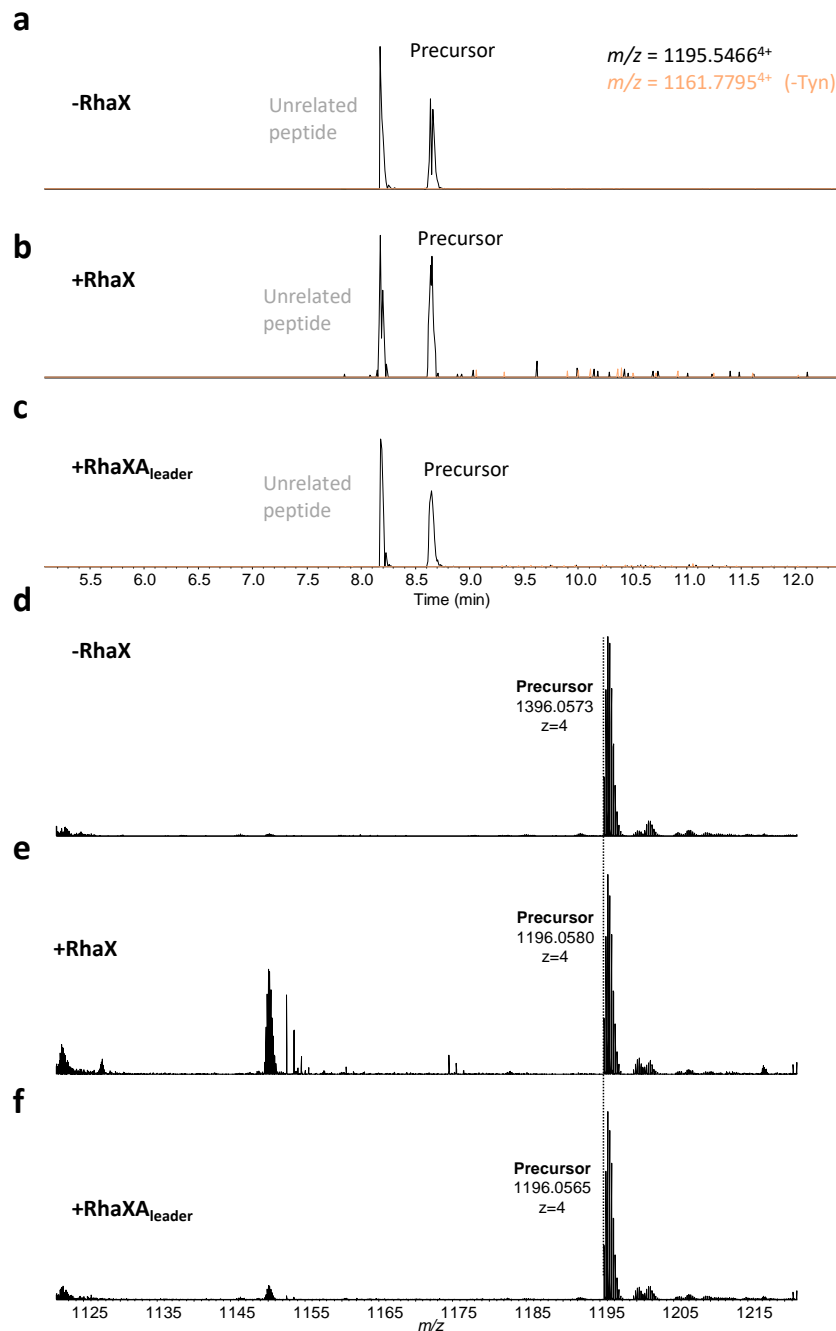

**Supplementary Figure S26.** LC-MS analysis for His<sub>6</sub>-SUMO-RhaA<sub>core</sub>-N32 cleaved with trypsin to give the peptide fragment AEQTPDELEMEDGDEIDAMLHQTGGHVALYGSVIDPHRFDMPLP. Extracted ion chromatograms for  $m/z$  1195.5466 (precursor, [M+4H]<sup>4+</sup>),  $m/z$  1161.7795 (modified, [M+4H]<sup>4+</sup>) for **a**) precursor only expression, **b**) precursor + RhaX co-expression, **c**) precursor + RhaX<sub>Aleader</sub> co-expression. Extracted mass spectra for **d**) precursor only expression, **e**) precursor + RhaX co-expression, **f**) precursor + RhaX<sub>Aleader</sub> co-expression. "Modified" refers to excision of tyramine (-C<sub>8</sub>H<sub>9</sub>NO).

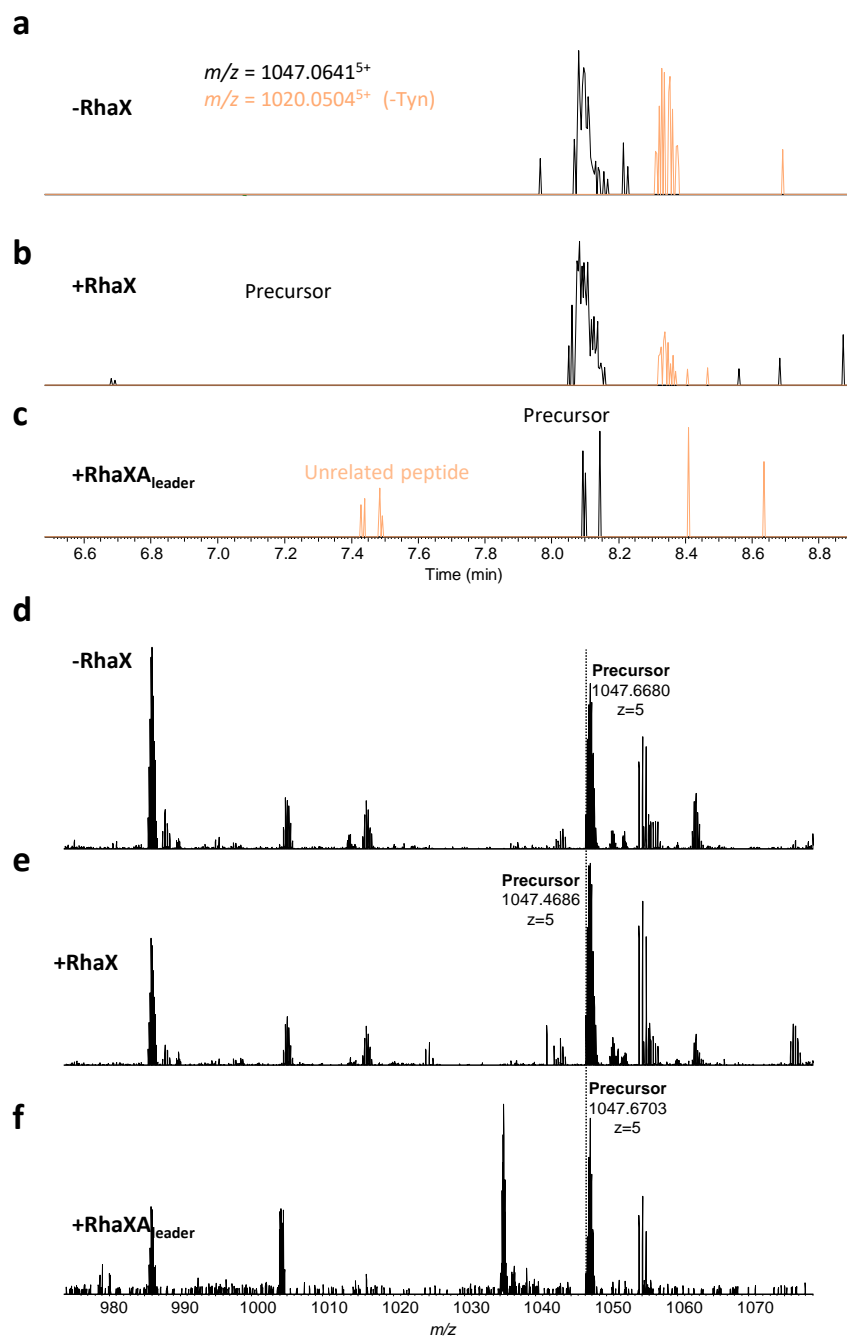

**Supplementary Figure S27.** LC-MS analysis for His<sub>6</sub>-SUMO-RhaA<sub>core</sub>-N24-C4 cleaved with trypsin to give the peptide fragment AEQTPDELEMEDGDEIDAMLHQTGGHHCDFVCGVALYGSVIDPHRF. Extracted ion chromatograms for  $m/z$  1047.0641 (precursor,  $[M+5H]^{5+}$ ),  $m/z$  1020.0504 (modified,  $[M+5H]^{5+}$ ) for **a**) precursor only expression, **b**) precursor + RhaX co-expression, **c**) precursor + RhaXA<sub>leader</sub> co-expression. Extracted mass spectra for **d**) precursor only expression, **e**) precursor + RhaX co-expression, **f**) precursor + RhaXA<sub>leader</sub> co-expression. "Modified" refers to excision of tyramine (-C<sub>8</sub>H<sub>9</sub>NO).

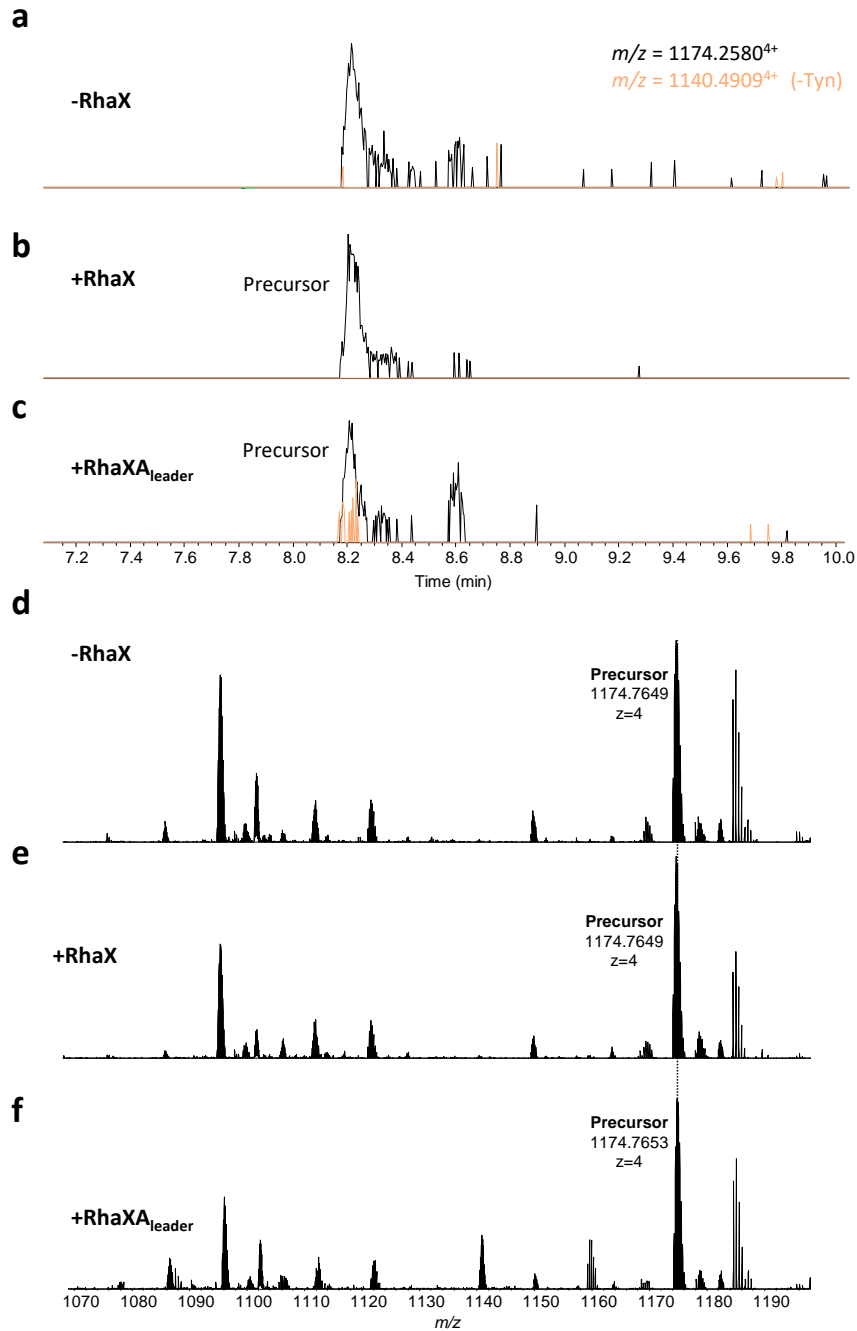

**Supplementary Figure S28.** LC-MS analysis for His<sub>6</sub>-SUMO-RhaA<sub>core</sub>-N24-C8 cleaved with trypsin to give the peptide fragment AEQTPDELEMEDGDEIDAMLHQTGGHHCDFVCGVALYGSVID. Extracted ion chromatograms for  $m/z$  1174.2580 (precursor, [M+4H]<sup>4+</sup>),  $m/z$  1140.4909 (modified, [M+4H]<sup>4+</sup>) for **a**) precursor only expression, **b**) precursor + RhaX co-expression, **c**) precursor + RhaX<sub>leader</sub> co-expression. Extracted mass spectra for **d**) precursor only expression, **e**) precursor + RhaX co-expression, **f**) precursor + RhaX<sub>leader</sub> co-expression. "Modified" refers to excision of tyramine (-C<sub>8</sub>H<sub>9</sub>NO).

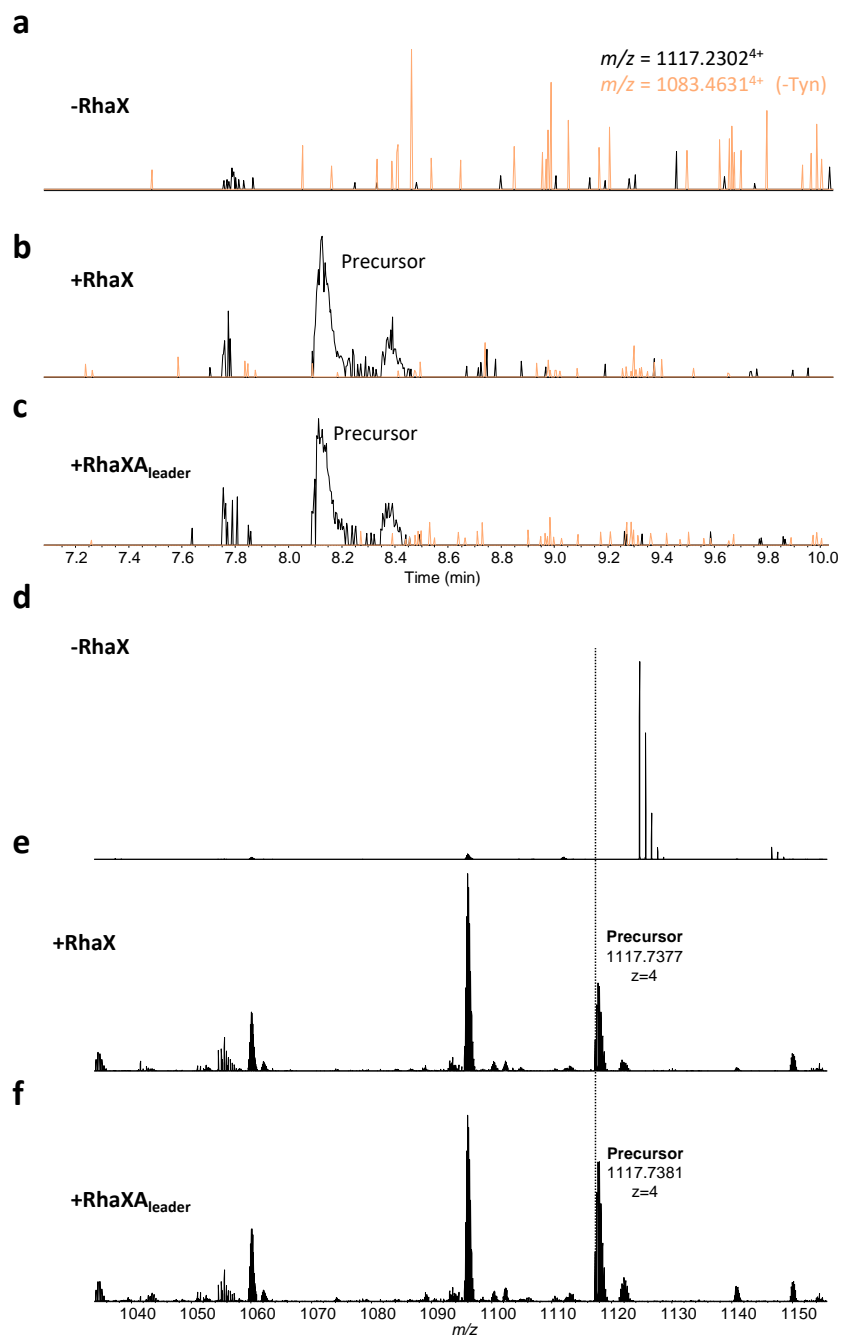

**Supplementary Figure S29.** LC-MS analysis for His<sub>6</sub>-SUMO-RhaA<sub>core</sub>-N24-C10 cleaved with trypsin to give the peptide fragment AEQTPDELEMEDGDEIDAMLHQTGGHHCDFVCGVALYGSV. Extracted ion chromatograms for  $m/z$  1117.2302 (precursor, [M+4H]<sup>4+</sup>),  $m/z$  1083.4631 (modified, [M+4H]<sup>4+</sup>) for **a**) precursor only expression, **b**) precursor + RhaX co-expression, **c**) precursor + RhaXA<sub>leader</sub> co-expression. Extracted mass spectra for **d**) precursor only expression, **e**) precursor + RhaX co-expression, **f**) precursor + RhaXA<sub>leader</sub> co-expression. "Modified" refers to excision of tyramine (-C<sub>8</sub>H<sub>9</sub>NO).

**Table S1.** Primers used in this study.

| Name                     | Sequence (5'-3')                                             |
|--------------------------|--------------------------------------------------------------|
| PlpY-PlpA3-N33_plpA3_fwd | TTATCTAAAGAAGAACGCCAACAAAC                                   |
| PlpY-PlpA3-N33_plpA3_rev | GCCGCTGCTGTGATGATG                                           |
| PlpY-PlpA3-N33_plpy_fwd  | ATCATCATCACAGCAGCGGCAACTCTAATCAAATACCAAATAAAG                |
| PlpY-PlpA3-N33_plpy_rev  | TGGCGTTCTTCTTTAGATAATGTCAGAAAATTGCTAATTTTC                   |
| PlpY-PlpA3-N45_plpA3_fwd | TCTGGCTATGATTTCACTGCC                                        |
| PlpY-PlpA3-N45_plpA3_rev | GCCGCTGCTGTGATGATG                                           |
| PlpY-PlpA3-N45_plpy_fwd  | ATCATCATCACAGCAGCGGCAACTCTAATCAAATACCAAATAAAG                |
| PlpY-PlpA3-N45_plpy_rev  | GCAGTGAAATCATAGCCAGATGTCAGAAAATTGCTAATTTTC                   |
| PcpXYfusion_fwd          | ATGGTCGAAAATATAGACAAC                                        |
| PcpXYfusion_rev          | ATCAACTACAGCACCAATC                                          |
| RhaXY_Cfusion_fwd        | GTTGAGGCTGTAGAGCTACTAAACAAAGTTGAATAGCTCGAGTCTGGTAAAG         |
| RhaXY_Cfusion_rev        | AACATGGTTTGTATCAAGTTTTACGTTTTTCATGCTGGCTATTGCGATACC          |
| PlpXYfusion_PlpX_fwd     | TAACCTCGAGTCTGGTAAAG                                         |
| PlpXYfusion_PlpX_rev     | CTTTGCTAAAGCGTAAGC                                           |
| PlpXYfusion_PlpY_fwd     | CTGCTTACGCTTTAGCAAAGATGAACTCTAATCAAATACCAAATAAAG             |
| PlpXYfusion_PlpY_rev     | TCTTTACCAGACTCGAGTTATTATGTCAGAAAATTGCTAATTTTC                |
| mCherry_Rha_fwd          | CTCCTCGGTTTTTACCCACTGTGACTTTTTTCGTTTGTGGTGTAGCGCTGTACGGCAGC  |
| mCherry_Rha_rev          | TCGATACGCTGACCGGTAGCGTTAATGCCGCCGCCGGCAGCTG                  |
| pACYC_Rha_fwd            | GGCGGGATTAACGCTACC                                           |
| pACYC_Rha_rev            | AGGCAACATATCGAAACGATG                                        |
| MBP_Cterm_fwd            | ATCGTTTCGATATGTTGCCTTAATCGTATTGTACACGGC                      |
| MBP_Cterm_rev            | CCGGTAGCGTTAATCCCGCCCTTCTGTTCCGACTTAAGC                      |
| MBP_154_fwd              | ATCGTTTCGATATGTTGCCTGCGCTGGATAAAGAACTGAAAG                   |
| MBP_154_rev              | CCGGTAGCGTTAATCCCGCCCGGATCTCTCCAGGTTTTTG                     |
| SUMO_nterm_fwd           | ATCGTTTCGATATGTTGCCTTTAGTTCCCTCGTGGTTCAG                     |
| SUMO_nterm_rev           | CCGGTAGCGTTAATCCCGCCACCGCTGCTATGATGATG                       |
| DHFR_nterm_fwd           | ATCGTTTCGATATGTTGCCTAGCCAGGATCCGGAGAATG                      |
| DHFR_nterm_rev           | CCGGTAGCGTTAATCCCGCCCATGGTATATCTCCTTATTAAGTTAAACAAAATTATTTTC |
| DHFR_118_fwd             | ATCGTTTCGATATGTTGCCTGGGGATACCCATTATCCG                       |
| DHFR_118_rev             | CCGGTAGCGTTAATCCCGCCTTCTACTTCGGCGTCAATG                      |

**Table S2.** Plasmids used in this study.

| Plasmid                       | Description                                                                                                                                                                                                                                 |
|-------------------------------|---------------------------------------------------------------------------------------------------------------------------------------------------------------------------------------------------------------------------------------------|
| <i>plpA3/pACYCDuet-1</i>      | PlpA3 precursor protein with an N-terminal His <sub>6</sub> -tag and a Factor Xa cleavage site under IPTG regulation and with chloramphenicol resistance (from here on referred to as PlpA3 (Morinaka, 2018))                               |
| <i>plpXY/pRSFDuet</i>         | Splicease PlpX together with its accessory protein PlpY under IPTG regulation and with kanamycin resistance (referred to as PlpXY) (Morinaka, 2018)                                                                                         |
| <i>sumo-pcpY/pCDF</i>         | Accessory protein PcpY with an N-terminal His <sub>6</sub> -tag, SUMO-tagged under IPTG regulation and with spectinomycin resistance (referred to as SUMO-PcpY)                                                                             |
| <i>sumo-pcpX/pCDF</i>         | Splicease PcpX with an N-terminal His <sub>6</sub> -tag, SUMO-tagged under IPTG regulation and with spectinomycin resistance (referred to as SUMO-PcpY)                                                                                     |
| <i>sumo-pcpXY/pCDF</i>        | Splicease PcpX with an N-terminal His <sub>6</sub> -tag and the accessory protein PcpY, PcpX is SUMO-tagged under IPTG regulation and with spectinomycin resistance (referred to as SUMO-PcpY)                                              |
| <i>pcpA/pCDF</i>              | PcpA precursor protein with an N-terminal His <sub>6</sub> -tag, under IPTG regulation and with spectinomycin resistance (referred to as PcpA (Morinaka, 2018))                                                                             |
| <i>plpX/pRSFDuet</i>          | Splicease PlpX under IPTG regulation and with kanamycin resistance (referred to as PlpXY)                                                                                                                                                   |
| <i>plpA3-33/pACYCDuet-1</i>   | PlpA3 precursor protein with an N-terminal His <sub>6</sub> -tag and a Factor Xa cleavage site, the first 33 amino acids replaced by PlpY, under IPTG regulation and with chloramphenicol resistance (from here on referred to as PlpA3-33) |
| <i>plpA3-45/pACYCDuet-1</i>   | PlpA3 precursor protein with an N-terminal His <sub>6</sub> -tag and a Factor Xa cleavage site, the first 45 amino acids replaced by PlpY, under IPTG regulation and with chloramphenicol resistance (from here on referred to as PlpA3-45) |
| <i>plpXYfusion/pRSFDuet</i>   | Splicease PlpX fused to its accessory protein PlpY under IPTG regulation and with kanamycin resistance (referred to as PlpXYfusion)                                                                                                         |
| <i>rhaA/pACYC</i>             | RhaA precursor protein with an N-terminal His <sub>6</sub> -tag under IPTG regulation and with chloramphenicol resistance (from here on referred to as RhaA)                                                                                |
| <i>sumo-rhaA/pACYC</i>        | SUMO with C-terminal RhaA core and N-terminal His <sub>6</sub> -tag under IPTG regulation and with chloramphenicol resistance (from here on referred to as SUMO-RhaAcore)                                                                   |
| <i>sumo-nterm-rhaA/pACYC</i>  | SUMO with N-terminal RhaA core and N-terminal His <sub>6</sub> -tag under IPTG regulation and with chloramphenicol resistance (from here on referred to as RhaAcore-SUMO)                                                                   |
| <i>mbp-rhaA/pACYC</i>         | MBP with C-terminal RhaA core and N-terminal His <sub>6</sub> -tag under IPTG regulation and with chloramphenicol resistance (from here on referred to as MBP-RhaAcore)                                                                     |
| <i>mbp-154-rhaA/pACYC</i>     | MBP with internal RhaA core and N-terminal His <sub>6</sub> -tag under IPTG regulation and with chloramphenicol resistance (from here on referred to as MBP-154-RhaAcore)                                                                   |
| <i>dhfr-118-rhaA/pACYC</i>    | DHFR with internal RhaA core and N-terminal His <sub>6</sub> -tag under IPTG regulation and with chloramphenicol resistance (from here on referred to as DHFR-118-RhaAcore)                                                                 |
| <i>mCherry-209-rhaA/pACYC</i> | mCherry with internal RhaA core and N-terminal His <sub>6</sub> -tag under IPTG regulation and with chloramphenicol resistance (from here on referred to as mCherry-209-RhaAcore)                                                           |



|                                   |                                                                                                                                                                                                                                                                     |
|-----------------------------------|---------------------------------------------------------------------------------------------------------------------------------------------------------------------------------------------------------------------------------------------------------------------|
| <i>rhaX/pRSF</i>                  | Splicease RhaX under IPTG regulation and with kanamycin resistance (referred to as RhaX)                                                                                                                                                                            |
| <i>rhaXAl leader/pRSF</i>         | Splicease RhaX with C-terminal fusion of the RhaA leader under IPTG regulation and with kanamycin resistance (referred to as RhaXA <sub>leader</sub> )                                                                                                              |
| <i>sumo-rhaA_N8del/pACYC</i>      | SUMO with C-terminal RhaA core and N-terminal His <sub>6</sub> -tag under IPTG regulation and with chloramphenicol resistance (from here on referred to as SUMO-RhaAcore). Truncation of the cleavage site and core by 8 N-terminal amino acids.                    |
| <i>sumo-rhaA_N24del/pACYC</i>     | SUMO with C-terminal RhaA core and N-terminal His <sub>6</sub> -tag under IPTG regulation and with chloramphenicol resistance (from here on referred to as SUMO-RhaAcore). Truncation of the cleavage site and core by 24 N-terminal amino acids.                   |
| <i>sumo-rhaA_N32del/pACYC</i>     | SUMO with C-terminal RhaA core and N-terminal His <sub>6</sub> -tag under IPTG regulation and with chloramphenicol resistance (from here on referred to as SUMO-RhaAcore). Truncation of the cleavage site and core by 32 N-terminal amino acids.                   |
| <i>sumo-rhaA_N24_C4del/pACYC</i>  | SUMO with C-terminal RhaA core and N-terminal His <sub>6</sub> -tag under IPTG regulation and with chloramphenicol resistance (from here on referred to as SUMO-RhaAcore). Truncation of the cleavage site and core by 24 N-terminal and 4 C-terminal amino acids.  |
| <i>sumo-rhaA_N24_C8del/pACYC</i>  | SUMO with C-terminal RhaA core and N-terminal His <sub>6</sub> -tag under IPTG regulation and with chloramphenicol resistance (from here on referred to as SUMO-RhaAcore). Truncation of the cleavage site and core by 24 N-terminal and 8 C-terminal amino acids.  |
| <i>sumo-rhaA_N24_C10del/pACYC</i> | SUMO with C-terminal RhaA core and N-terminal His <sub>6</sub> -tag under IPTG regulation and with chloramphenicol resistance (from here on referred to as SUMO-RhaAcore). Truncation of the cleavage site and core by 24 N-terminal and 10 C-terminal amino acids. |

**Table S3.** Protein sequences used in this study. The precursor (minimal) core sequence is underlined. Splicease modification sites are shown in bold.

| Protein                     | Sequence                                                                                                                                                                                                                                                                                                                                                                                                                                                                                                                                                      |
|-----------------------------|---------------------------------------------------------------------------------------------------------------------------------------------------------------------------------------------------------------------------------------------------------------------------------------------------------------------------------------------------------------------------------------------------------------------------------------------------------------------------------------------------------------------------------------------------------------|
| His <sub>6</sub> -PipA3     | GSSHHHHHHSSGLVPRGSHMSIESAKAFYQRMTDDASFRTPFEAELSKEERQQLIKDSGYDFTAEEW<br>QQAMTEIQAARSNEELNEEELEIAIGRAVAAMYGVVFPWDNEFPWPRWGG                                                                                                                                                                                                                                                                                                                                                                                                                                     |
| His <sub>6</sub> -PipYA3-33 | MGSSHHHHHHSSGNSNQIPNKVATAAQKSDSSSVLPRQGWQDKQAFIKALIKAKQSLEIAEISNFLT<br>SKEERQQLIKDSGYDFTAEEWQQAMTEIQAARSNEELNEEELEAIDGRAVAAMYGVVFPWDNEFPWP<br>RWGG                                                                                                                                                                                                                                                                                                                                                                                                            |
| His <sub>6</sub> -PipYA3-45 | MGSSHHHHHHSSGNSNQIPNKVATAAQKSDSSSVLPRQGWQDKQAFIKALIKAKQSLEIAEISNFLT<br>SGYDFTAEEWQQAMTEIQAARSNEELNEEELEAIDGRAVAAMYGVVFPWDNEFPWPRWGG                                                                                                                                                                                                                                                                                                                                                                                                                           |
| His <sub>6</sub> -PcpA      | MGSSHHHHHHSSGENLYFQSHMSSNILEKVEFFVRLVKDDAFQSQLQNNIDEVRNQLQEAGYIFSK<br>EEFETATIELLDLKERDEFHELTEEELVTAVGGVTGGSGIYGPIQAMYGAVVGDPKPGKDWGWRFPSP<br>LPKPSPIPSPWKPPVDVQPMYGVVSNDS                                                                                                                                                                                                                                                                                                                                                                                    |
| His <sub>6</sub> -SUMO-PcpX | MGSSHHHHHHSSGLVPRGSASHINLKVKGQDGNVFFRIKRSTQLKMLMAYCDRQSVDMTIAIFLF<br>DGRRLRAEQTPDELEMEDGDEIDAMLHQTGGHMYRRTSYAVWEITLKNLACSHCGSRAGHTRAK<br>ELSTQEALDLVRQMADVGIIEVTLIGGEAFLRPDWLQIAEAITKAGMLCSMTTGGYGISLETARKMKAA<br>GIASVSVSIDGLEETHDRLRGRKGSWQAAFKTMHLREVGIFFGCNTQINRLSAPEFPLIYERIRDAGA<br>RAWQIQLTVPMGRAADNANILLQPYELLDLYPMIARVARRARQEGVQIQPGNNIYGYGPYERLLRGRG<br>SDSEWAFWQCAAGLSTLGLIADGAIGKCPSLPTSAYTGGNIREHSLREIVEESEQLRFNLGAGTSQG<br>TAHLWGFQCTCFSELCRGGCTWTAHVFFNRRGNPNYCHHRALFQAEQGIRERVVPKVEAQLPFD<br>NGEFELIEPIDAPLPENDPLHFTSDLVQWSASWQEESESIGAVVD    |
| His <sub>6</sub> -SUMO-PcpY | MGSSHHHHHHSSGLVPRGSHMSIESAKAFYQRMTDDASFRTPFEAELSKEERQQLIKDSGYDFTAEEW<br>DGRRLRAEQTPDELEMEDGDEIDAMLHQTGGHMYRRTSYAVWEITLKNLACSHCGSRAGHTRAK<br>ELSTQEALDLVRQMADVGIIEVTLIGGEAFLRPDWLQIAEAITKAGMLCSMTTGGYGISLETARKMKAA<br>GIASVSVSIDGLEETHDRLRGRKGSWQAAFKTMHLREVGIFFGCNTQINRLSAPEFPLIYERIRDAGA<br>RAWQIQLTVPMGRAADNANILLQPYELLDLYPMIARVARRARQEGVQIQPGNNIYGYGPYERLLRGRG<br>SDSEWAFWQCAAGLSTLGLIADGAIGKCPSLPTSAYTGGNIREHSLREIVEESEQLRFNLGAGTSQG<br>TAHLWGFQCTCFSELCRGGCTWTAHVFFNRRGNPNYCHHRALFQAEQGIRERVVPKVEAQLPFD<br>NGEFELIEPIDAPLPENDPLHFTSDLVQWSASWQEESESIGAVVD |
| PcpY                        | MVENIDNEREKSANEIEPESLLLPRQAWQSQIAYLKAILKAKQALDRIEKRYLR                                                                                                                                                                                                                                                                                                                                                                                                                                                                                                        |

|                                                  |                                                                                                                                                                                                                                                                                                                                                                                                                                                                                                                                                                                             |
|--------------------------------------------------|---------------------------------------------------------------------------------------------------------------------------------------------------------------------------------------------------------------------------------------------------------------------------------------------------------------------------------------------------------------------------------------------------------------------------------------------------------------------------------------------------------------------------------------------------------------------------------------------|
| His <sub>6</sub> -SUMO-PcpXYfusion               | MGSHHHHHHSSGLVPRGSASHINLKVKGQDGNVFFRIKRSTQLKMLNAYCDRQSVDMTIAIFLDGRRLRAEQTPDELEMEDGDEIDAMLHQTGGHMTYRRTSYAVWEITLKC�LACSHCGSRAGHTRAKELSTQEALDLVRQMADVGIIEVTLIGGEAFLRPDWLQIAEAITKAGMLCSMTTGGYGISLETARKMKAAIASVSVSIDGLEETHDRLRGRKGSWQAAFKTMŠHLREVGIFFGCNTQINRLSAPEFPIYERIRDAGARAWQIQLTVPMGRAADNANILLQPYELLDLYPMIARVARRARQEGVQIQPGNNIGYYGPIYERLLRGRGSDSEWAFWQGCCAAGLSTLGIADGAIKGCPŠLPTSAYTTGGNIREHŠLREIVEESEQLRFNLGAGTSQGT AHLWGFCQTCEFSELCRGGCTWTAHVFFNRRGNPNPYCHHRALFQAEQGIRERVVPKVEAQGLPFDNGEFELIEEPIDAPLPENDPLHFTSDLVQWSASWQEESESIGAVVDMVENIDNEREKSANEIEPESLLLPRQAWQSQIAYLKAILKAKQALDRIEKRYLR |
| PipX                                             | MTKKYRRVSYAVWEITLKC�LACSHCGSRAGQARTKELSTEEAFNLVRQLADVGIKEVTLIGGEAFMRSDWLEIAKAVTEAGMICGMITGGFGVSLETARKMKEAGIKTVSVSIDGGIPETHDRQRGKKGAWHSARTEMŠHLKEVGIYFGCNTQINRLSASEFPIYERIRDAGARAWQIQLTVPMGNAADNADMLLQPYELLDIYPMLARVAKRAKQEGVRIQAGNNIGYYGPIYERLLRGSDEWTFWQCGAGLNTLGIADGKIKGCPŠLPTAAYTGGNIRDRLPREIVEQTEELKFNLKAGTEQGTDHMWGFCCTCEFAELCRGGCSWTAHVFFDRRGNNPYCHHRALKQAQKDIRERFYLKVKAKGNPFNDGEFVIIIEEPFNAPLPENDLLHFNSDHIQWPENWQNSESAYALAK                                                                                                                                                          |
| PipY                                             | MNSNQIPNKVATAAQKSDSSSVLPRQGWQDKQAFIKALIKAKQSLEIAEISNFLT                                                                                                                                                                                                                                                                                                                                                                                                                                                                                                                                     |
| PipXY <sub>fusion</sub>                          | MTKKYRRVSYAVWEITLKC�LACSHCGSRAGQARTKELSTEEAFNLVRQLADVGIKEVTLIGGEAFMRSDWLEIAKAVTEAGMICGMITGGFGVSLETARKMKEAGIKTVSVSIDGGIPETHDRQRGKKGAWHSARTEMŠHLKEVGIYFGCNTQINRLSASEFPIYERIRDAGARAWQIQLTVPMGNAADNADMLLQPYELLDIYPMLARVAKRAKQEGVRIQAGNNIGYYGPIYERLLRGSDEWTFWQCGAGLNTLGIADGKIKGCPŠLPTAAYTGGNIRDRLPREIVEQTEELKFNLKAGTEQGTDHMWGFCCTCEFAELCRGGCSWTAHVFFDRRGNNPYCHHRALKQAQKDIRERFYLKVKAKGNPFNDGEFVIIIEEPFNAPLPENDLLHFNSDHIQWPENWQNSESAYALAKMNSNQIPNKVATAAQKSDSSSVLPRQGWQDKQAFIKALIKAKQSLEIAEISNFLT                                                                                                   |
| His <sub>6</sub> -RhaA                           | MGSHHHHHHSQDPMKNVKLDTNHVVEAVELLNKVEGGINATGQRIDSSVFTHCDFVCGVALYGSVIDPHRFDMLP                                                                                                                                                                                                                                                                                                                                                                                                                                                                                                                 |
| RhaX                                             | MTSLANŠGIKLRHRQTYAVWEITLKC�LACSHCGSRAGDSRVNELSTSEALDLVQQMAELGIEDVŠLIGGEAFLRPDWLIIAAEITRLGMNANMTTGGYGISRGTAKRMKEAGISNVSVSDGLEATHDKLRGKLGAWQCFKTIIEHLRAVGINVGCNTQINKHSATELPMLYQQLVQHGVSAWQIQLTVPMGNAVEHNAMLLQPYELLELYPVLAYLSKRGRKDKLMVQPGNNIGYFGPIYERLLREPIŠRHRDFAFFRGCGAGINTIGIEADGKVKGCPŠLPSEQYTTGGNIRERSLRDIYENŠKELRFNDINKPEDVTAHMGWDCASCEYAKVCRAGCSWTAHVFFGRRGNPNPYCHHRALKKAVLGKMERFYLKTPAAGQPFDHGVFELVEEQIKPFDPMDPAHFSIAQTQFPAEWLAEEPDLQKŠMLERSMLMLQYVESGIVKQADSPWFDPAKREAIKQGIAS                                                                                                        |
| RhaX <sub>leader</sub>                           | MTSLANŠGIKLRHRQTYAVWEITLKC�LACSHCGSRAGDSRVNELSTSEALDLVQQMAELGIEDVŠLIGGEAFLRPDWLIIAAEITRLGMNANMTTGGYGISRGTAKRMKEAGISNVSVSDGLEATHDKLRGKLGAWQCFKTIIEHLRAVGINVGCNTQINKHSATELPMLYQQLVQHGVSAWQIQLTVPMGNAVEHNAMLLQPYELLELYPVLAYLSKRGRKDKLMVQPGNNIGYFGPIYERLLREPIŠRHRDFAFFRGCGAGINTIGIEADGKVKGCPŠLPSEQYTTGGNIRERSLRDIYENŠKELRFNDINKPEDVTAHMGWDCASCEYAKVCRAGCSWTAHVFFGRRGNPNPYCHHRALKKAVLGKMERFYLKTPAAGQPFDHGVFELVEEQIKPFDPMDPAHFSIAQTQFPAEWLAEEPDLQKŠMLERSMLMLQYVESGIVKQADSPWFDPAKREAIKQGIASMKNVKLDTNHVVEAVELLNKVE                                                                                  |
| His <sub>6</sub> -SUMO-Rha <sub>core</sub>       | MGSHHHHHHSSGLVPRGSASHINLKVKGQDGNVFFRIKRSTQLKMLNAYCDRQSVDMTIAIFLDGRRLRAEQTPDELEMEDGDEIDAMLHQTGGHMASMTGGQGGINATGQRIDSSVFTHCDFVCGVALYGSVIDPHRFDMLP                                                                                                                                                                                                                                                                                                                                                                                                                                             |
| His <sub>6</sub> -mCherry209-Rha <sub>core</sub> | VŠKGEEDNMAIIEFMRFKVHMEGSVNGHEFEIEGEGEGRPYEGTQAKLKVTKGGPLPFAWDILSPQFMYGŠKAYVKHPADIPDYLKŠFPEGFKWERVMNFEDGGVVTVTQDŠSLQDGEFIYKVKLRGTNFPSDGPVMQKKTMGWEASSERMYPEDGALKGEIKQRLKLDGGHYDAEVKTTYKAKKPVQLPŠGGINATGQRIDSSVFTHCDFVCGVALYGSVIDPHRFDMLP                                                                                                                                                                                                                                                                                                                                                     |
| His <sub>6</sub> -DHFR118-Rha <sub>core</sub>    | MGSHHHHHHSQDPENAMPWNLPADLAWVKRNTLNKPVIMGRHTWESIGRPLPGRKNIILŠSQPGTDRVTWVKŠVDEIAACGDVPEIMVIGGGRYEQLLPKAQKLYLTHIDAEEVGGINATGQRIDSSVFTHCDFVCGVALYGSVIDPHRFDMLPGDTHYPDYEPDWERVFSEYHDADAQNSHŠYCYEILERRGŠRŠHHHHH                                                                                                                                                                                                                                                                                                                                                                                   |
| His <sub>6</sub> -MBP-Cterm-Rha <sub>core</sub>  | MGSHHHHHHSSGLVPRGŠHNKIEEGKLVIVINGDKGYNGLAEVGKKEKDTGIKVTVEHPDKLEEKFPQVAATGDGPDIIIFWAHDRFGGYAQŠGLLAEITPDKAFQDKLYPFTWDVAVRYNGKLIAYPIAVEALŠLIYNKDLLPNPKTWEEIPALDKELKAKGŠALMFNLQEPYFTWPLIAADGGYAFKYENGYDIKDVGVDNAGAKAGLTFVLDIKNKHMNADTDYSIAEAAFNKGETAMTINGPWAWŠNIDTSKVNYGVTVLPTFKGQPSKPFVGVLSAGINAASPNKELAKEFLENYLLTDEGLEAVNKDKPLGAVALKŠYEELAKDPRIATME                                                                                                                                                                                                                                           |

|                                                        |                                                                                                                                                                                                                                                                                                                                                                                                                                                                                                                   |
|--------------------------------------------------------|-------------------------------------------------------------------------------------------------------------------------------------------------------------------------------------------------------------------------------------------------------------------------------------------------------------------------------------------------------------------------------------------------------------------------------------------------------------------------------------------------------------------|
|                                                        | NAQKGEIMPNIQMSAFWYAVRTAVINAASGRQTVDEALKDAQTNSSSSNNNNNNNNNNLGGIEGLYFQ<br>SGSEFELGAPAGRQACGRIMLKSNRKGGINATGQRIDSSVFTHCDFVCGVALYGSVIDPHRFDMPL                                                                                                                                                                                                                                                                                                                                                                        |
| His <sub>6</sub> -MBP154-<br>RhaA <sub>core</sub>      | MGSSHHHHHHSSGLVPRGSHNKIEEGKLVWINGDKGYNGLAEVGKKFEKDTGIKVTVEHPDKLEEKF<br>PQVAATGDGPDIIFWAHDRFGGYAQSGLLAEITPKAFQDKLYPFTWDAVRYNGKLIAYPIAVEALSIIY<br>NKDLLPNPPKTWEEIPGGINATGQRIDSSVFTHCDFVCGVALYGSVIDPHRFDMPLPALDKELKAKGKS<br>ALMFNLQEPYFTWPLIAADGGYAFKYENGYDIKDVGVNAGAKAGLTFVLVLIKNKHMNADTDYSIAE<br>AAFNKGETAMTINGPWAWSNIDTSKVNYGVTVLPTFKGQPSKPFVGLSAGINAASPNKELAKEFLEN<br>YLLTDEGLEAVNKDKPLGAVALKSYEEELAKDPRIAATMENAQKGEIMPNIQMSAFWYAVRTAVINAA<br>SGRQTVDEALKDAQTNSSSSNNNNNNNNNNLGGIEGLYFQSGSEFELGAPAGRQACGRIMLKSNRK |
| DHFR-Nterm-<br>RhaA <sub>core</sub> -His <sub>6</sub>  | MGGINATGQRIDSSVFTHCDFVCGVALYGSVIDPHRFDMPLQDPENAMPWNLADLAWVKRNTLNK<br>PVMGRHTWESIGRPLPGRKNILSSQPGTDDRVTWVKSVDEAIAACGDVPEIMVIGGRRVYEQLLPKA<br>QKLYLTHIDAEVEGDTHYPDYEPDDWERVVFSEYHDADAQNSHSYCYEILERRGSRSHHHHHH                                                                                                                                                                                                                                                                                                       |
| His <sub>6</sub> -SUMO-<br>Nterm-RhaA <sub>core</sub>  | MGSHHHHHHHSSGGGINATGQRIDSSVFTHCDFVCGVALYGSVIDPHRFDMPLVPRGSASHINLKV<br>KGQDGNVFFRIKRSTQLKLMNAYCDRQSVDMTIAIAFLFDGRRLRAEQTPDELEMEDGDEIDAMLH<br>QTGG                                                                                                                                                                                                                                                                                                                                                                  |
| His <sub>6</sub> -SUMO-<br>Rha <sub>core</sub> -N8     | MGSHHHHHHHSSGLVPRGSASHINLKVKGQDGNVFFRIKRSTQLKLMNAYCDRQSVDMTIAIAFLF<br>DGRRLRAEQTPDELEMEDGDEIDAMLHQTGGHGGINATGQRIDSSVFTHCDFVCGVALYGSVIDPH<br>RFDMPL                                                                                                                                                                                                                                                                                                                                                                |
| His <sub>6</sub> -SUMO-<br>Rha <sub>core</sub> -N24    | MGSHHHHHHHSSGLVPRGSASHINLKVKGQDGNVFFRIKRSTQLKLMNAYCDRQSVDMTIAIAFLF<br>DGRRLRAEQTPDELEMEDGDEIDAMLHQTGGHHCDFVCGVALYGSVIDPHRFDMPL                                                                                                                                                                                                                                                                                                                                                                                    |
| His <sub>6</sub> -SUMO-<br>Rha <sub>core</sub> -N32    | MGSHHHHHHHSSGLVPRGSASHINLKVKGQDGNVFFRIKRSTQLKLMNAYCDRQSVDMTIAIAFLF<br>DGRRLRAEQTPDELEMEDGDEIDAMLHQTGGHVALYGSVIDPHRFDMPL                                                                                                                                                                                                                                                                                                                                                                                           |
| His <sub>6</sub> -SUMO-<br>Rha <sub>core</sub> -N24C4  | MGSHHHHHHHSSGLVPRGSASHINLKVKGQDGNVFFRIKRSTQLKLMNAYCDRQSVDMTIAIAFLF<br>DGRRLRAEQTPDELEMEDGDEIDAMLHQTGGHHCDFVCGVALYGSVIDPHRF                                                                                                                                                                                                                                                                                                                                                                                        |
| His <sub>6</sub> -SUMO-<br>Rha <sub>core</sub> -N24C8  | MGSHHHHHHHSSGLVPRGSASHINLKVKGQDGNVFFRIKRSTQLKLMNAYCDRQSVDMTIAIAFLF<br>DGRRLRAEQTPDELEMEDGDEIDAMLHQTGGHHCDFVCGVALYGSVID                                                                                                                                                                                                                                                                                                                                                                                            |
| His <sub>6</sub> -SUMO-<br>Rha <sub>core</sub> -N24C10 | MGSHHHHHHHSSGLVPRGSASHINLKVKGQDGNVFFRIKRSTQLKLMNAYCDRQSVDMTIAIAFLF<br>DGRRLRAEQTPDELEMEDGDEIDAMLHQTGGHHCDFVCGVALYGSV                                                                                                                                                                                                                                                                                                                                                                                              |

**Table S4.** Nucleotide sequences encoding for protein sequences used in this study.

| Encoded Protein             | Nucleotide Sequence                                                                                                                                                                                                                                                                                                                                                                                                                                    |
|-----------------------------|--------------------------------------------------------------------------------------------------------------------------------------------------------------------------------------------------------------------------------------------------------------------------------------------------------------------------------------------------------------------------------------------------------------------------------------------------------|
| His <sub>6</sub> -PlpA3     | ATGGGCAGCAGCCATCATCATCATCACAGCAGCGGCCTGGTGCCGCGCGGCAGCCATATGT<br>CTATTGAAAGTGCAAAAGCTTTTTACCAAAGAATGACCGATGATGCATCCTTTCGCACACCATTTG<br>AAGCAGAATTATCTAAAGAAGAACGCCAACAACTAATTAAGACTCTGGCTATGATTTCACTGCCG<br>AGGAATGGCAGCAAGCGATGACAGAAATTAAGCTGCTAGGTCTAATGAGGAATTGAATGAAGAA<br>GAACTTGAAGCGATCGCAGGTGGTCTGTAGCAGCAATGATGGCGTAGTTTTTCTTGGGATAA<br>TGAATTTCTTGGCCTAGGTGGGGGGGATAA                                                                       |
| His <sub>6</sub> -PlpYA3-33 | ATGGGCAGCAGCCATCATCATCATCACAGCAGCGGCAACTCTAATCAAATACCAAATAAAGTA<br>GCCACAGCAGCTCAAAAATCAGATGATTCAGCTCGGTTTTACCTCGTCAGGGTTGGCAAGACAA<br>GCAAGCTTTTATCAAAGCATTAAATTAAGCAAAAACAAAGTTTAGAAATTGCTGAAATTAGCAATTT<br>CTGACATTATCTAAAGAAGAACGCCAACAACTAATTAAGACTCTGGCTATGATTTCACTGCCGAG<br>GAATGGCAGCAAGCGATGACAGAAATTAAGCTGCTAGGTCTAATGAGGAATTGAATGAAGAAGA<br>ACTTGAAGCGATCGATGGTCTGTCTGTAGCAGCAATGATGGCGTAGTTTTTCTTGGGATAATG<br>AATTTCTTGGCCTAGGTGGGGGGGATAA |
| His <sub>6</sub> -PlpYA3-45 | ATGGGCAGCAGCCATCATCATCATCACAGCAGCGGCAACTCTAATCAAATACCAAATAAAGTA<br>GCCACAGCAGCTCAAAAATCAGATGATTCAGCTCGGTTTTACCTCGTCAGGGTTGGCAAGACAA<br>GCAAGCTTTTATCAAAGCATTAAATTAAGCAAAAACAAAGTTTAGAAATTGCTGAAATTAGCAATTT<br>CTGACATCTGGCTATGATTTCACTGCCGAGGAATGGCAGCAAGCGATGACAGAAATTAAGCTGC<br>TAGGTCTAATGAGGAATTGAATGAAGAAGAACTTGAAGCGATCGATGGTCTGTCTGTAGCAGCAA<br>TGTATGGCGTAGTTTTTCTTGGGATAATGAATTTCTTGGCCTAGGTGGGGGGGATAA                                       |
| His <sub>6</sub> -PcpA      | ATGGGCAGCAGCCATCATCATCATCACAGCAGCGGCGAGAATCTCTACTTCCAGTCACATAT<br>GTCCTCAAATATCTTAGAAAAAGTCAAAGAGTTTTTGTGAGGCTAGTTAAAGATGACGCTTTCCAA<br>TCTCAACTTCAAATAATTAATCGACGAAGTTAGAAACATCTTACAAGAAGCTGGCTATATTTTCT<br>CAAAAAGAATTTGAGACAGCTACGATTGAGCTACTCGATTTAAAAGAACGAGACGAATTTCCAG<br>AACTGACAGAAGAAGAGTTAGTACAGCCGTTGGTGGGGTACTGGGGTAGCGGGATCTACGG<br>ACCCATTCAGGCAATGTACGGAGCAGTGGTAGGAGATCCCAAGCCGGTAAGGATTGGGGTTGG                                      |

|                                        |                                                                                                                                                                                                                                                                                                                                                                                                                                                                                                                                                                                                                                                                                                                                                                                                                                                                                                                                                                                                                                                                                                                                                                                                                                                                                                                                                                                                                                                                                                                                                                                                                                                                                                          |
|----------------------------------------|----------------------------------------------------------------------------------------------------------------------------------------------------------------------------------------------------------------------------------------------------------------------------------------------------------------------------------------------------------------------------------------------------------------------------------------------------------------------------------------------------------------------------------------------------------------------------------------------------------------------------------------------------------------------------------------------------------------------------------------------------------------------------------------------------------------------------------------------------------------------------------------------------------------------------------------------------------------------------------------------------------------------------------------------------------------------------------------------------------------------------------------------------------------------------------------------------------------------------------------------------------------------------------------------------------------------------------------------------------------------------------------------------------------------------------------------------------------------------------------------------------------------------------------------------------------------------------------------------------------------------------------------------------------------------------------------------------|
|                                        | CGCTTTCCAAGTCCGTTACCAAAGCCATCACCCATACCTTCTCCCTGGAAGCCGCCAGTTGACGT<br>GCAGCCGATGTATGGGGTAGTTGTCTCAAACGATTCATAA                                                                                                                                                                                                                                                                                                                                                                                                                                                                                                                                                                                                                                                                                                                                                                                                                                                                                                                                                                                                                                                                                                                                                                                                                                                                                                                                                                                                                                                                                                                                                                                            |
| His <sub>6</sub> -SUMO-PcpX            | ATGGGTAGCCACCACCACCACCATCATATAGCAGCGGTTTAGTTCCTCGTGTTTCAGCTAGCCA<br>CATCAACCTGAAGGTGAAAGGCCAGGATGGCAACGAGGTGTTCTTCCGCATTAACGCTCAACCC<br>AGCTGAAGAAGCTGATGAACGCGTACTGCGATCGTCAGAGCGTGGATATGACCGCAATTGCGTTC<br>CTGTTTCGATGGTCTGCTTTACGTGCAGAACAAACCCCGGACGAACTGGAATGGAAGATGGCG<br>ACGAGATTGATGCCATGCTGCATCAGACCGGTGGCCATATGACTTATCGCAGAACCAGTTATGCC<br>GTTTGGGAAATTACCCTAAAGTGTAATTTAGCCTGTAGTCACTGCGGTTTCGCGAGCGGGACATAC<br>CAGGGCTAAGGAACTCTCGACACAAGAGGCTCTCGATCTCGTCCGGCAGATGGCGGACGTAGGG<br>ATTATAGAGGTGACGTTGATTGGCGGCGAGGCATTTCTTCGTCAGACTGGCTGCAAATTCAGAG<br>GGCTATTACTAAGGCGGGGATGCTATGCAGTATGACGACTGGCGGCTATGGCATTTCGCTGGAG<br>ACGGCGCGTAAAATGAAGGCAGCAGGCATCGCTTCGGTTTTCGTTTTCCATTGATGGGCTCGAAG<br>AAACCCACGATCGCTGCGGGGAAGAAAAGGCTCCTGGCAAGCTGCTTTAAGACTATGAGCCA<br>CCTGCGAGAAGTCGGGATTTTCTTTGGCTGCAACACCCAAATCAACCGTCTTTCTGCGCCGGAAT<br>TTCCCCTCATTTACGAACGCATTTCGCGACGCTGGCGCTAGGGCTTGGCAAATTCAGTAAACCGTA<br>CCGATGGGAAGGGCAGCAGACAATGCCAATATTCTGCTGCAACCTTACGAGTTACTAGATCTCTA<br>CCCAATGATAGCCCGCTAGCCCGTGGGACGCGCAAGAAGGCGTTCAGATCCAGCCTGGAAC<br>AATATTGGTTATTATGGTCTTACGAACGCGCTTACGGGGACGAGGAAGCGATAGCGAATGGGC<br>ATTTTGGCAGGGTTGCGCTGCCGACTCTCAACCTTGGGAATCGAGGCAGACGGCGCAATTAAG<br>GGGTGTCCTTCACTGCCAATTCGGCTTACACCGCGGAAACATTCGAGAGCATTTCGCTGCGGG<br>AGATCGTTGAAGAATCAGAGCAACTACGTTTCAATCTCGGCGCGGGAACTCCCAGGGAAGTGT<br>CATCTGTGGGGTTCTGCCAAACCTGCGAGTTTTCAGAACTGTGTCGTGGGGGCTGCACTTGA<br>CTGCCACGTTTTCTCAACCGTCGAGGAACAACCCCTTACTGCCATCACCAGGCGCTCTTTCAA<br>GCAGAGCAAGGCATTTCGGGAGCGCTCGTTCCCTAAAGTAGAGGCGCAGGGACTACCTTTTGACA<br>ATGGGAATTTCGAGCTAATTGAAGAGCCGATTGATGCTCCTTTACCAGAAAACGATCCCTGCAAT<br>TTACATCCGATCTCGTCCAGTGGTCCGCAAGCTGGCAGGAAGAATCCGAGTCGATTGGTGCTGTA<br>GTTGATTAA |
| His <sub>6</sub> -SUMO-PcpY            | ATGGGTAGCCACCACCACCACCATCATATAGCAGCGGTTTAGTTCCTCGTGTTTCAGCTAGCCA<br>CATCAACCTGAAGGTGAAAGGCCAGGATGGCAACGAGGTGTTCTTCCGCATTAACGCTCAACCC<br>AGCTGAAGAAGCTGATGAACGCGTACTGCGATCGTCAGAGCGTGGATATGACCGCAATTGCGTTC<br>CTGTTTCGATGGTCTGCTTTACGTGCAGAACAAACCCCGGACGAACTGGAATGGAAGATGGCG<br>ACGAGATTGATGCCATGCTGCATCAGACCGGTGGCCATATGGTTCGAAAATATAGACAACGAGCGA<br>GAGAAAATCGGCAAATGAAATCGAGCCAGAACTCTCCTATTGCCCGTCAAGATTGGCAAAGTCA<br>AATTGCCTATCTAAAAGCGATTTTGAAGCCAAACAAGCTCTAGATCGAATAGAAAAAGGTATTT<br>GCGTTAA                                                                                                                                                                                                                                                                                                                                                                                                                                                                                                                                                                                                                                                                                                                                                                                                                                                                                                                                                                                                                                                                                                                                                                                                    |
| PcpY                                   | ATGGTCGAAAATATAGACAACGAGCGAGAGAAATCGGCAAATGAAATCGAGCCAGAATCTCTCCT<br>ATTGCCCGTCAAGCTTGGCAAAGTCAAATTCGCTATCTAAAAGCGATTTTGAAGCCAAACAAGC<br>TCTAGATCGAATAGAAAAAGGTATTTGCGTTAA                                                                                                                                                                                                                                                                                                                                                                                                                                                                                                                                                                                                                                                                                                                                                                                                                                                                                                                                                                                                                                                                                                                                                                                                                                                                                                                                                                                                                                                                                                                               |
| His <sub>6</sub> -SUMO-<br>PcpXYfusion | ATGGGTAGCCACCACCACCACCATCATATAGCAGCGGTTTAGTTCCTCGTGTTTCAGCTAGCCA<br>CATCAACCTGAAGGTGAAAGGCCAGGATGGCAACGAGGTGTTCTTCCGCATTAACGCTCAACCC<br>AGCTGAAGAAGCTGATGAACGCGTACTGCGATCGTCAGAGCGTGGATATGACCGCAATTGCGTTC<br>CTGTTTCGATGGTCTGCTTTACGTGCAGAACAAACCCCGGACGAACTGGAATGGAAGATGGCG<br>ACGAGATTGATGCCATGCTGCATCAGACCGGTGGCCATATGACTTATCGCAGAACCAGTTATGCC<br>GTTTGGGAAATTACCCTAAAGTGTAATTTAGCCTGTAGTCACTGCGGTTTCGCGAGCGGGACATAC<br>CAGGGCTAAGGAACTCTCGACACAAGAGGCTCTCGATCTCGTCCGGCAGATGGCGGACGTAGGG<br>ATTATAGAGGTGACGTTGATTGGCGGCGAGGCATTTCTTCGTCAGACTGGCTGCAAATTCAGAG<br>GGCTATTACTAAGGCGGGGATGCTATGCAGTATGACGACTGGCGGCTATGGCATTTCGCTGGAG<br>ACGGCGCGTAAAATGAAGGCAGCAGGCATCGCTTCGGTTTTCGTTTTCCATTGATGGGCTCGAAG<br>AAACCCACGATCGCTGCGGGGAAGAAAAGGCTCCTGGCAAGCTGCTTTAAGACTATGAGCCA<br>CCTGCGAGAAGTCGGGATTTTCTTTGGCTGCAACACCCAAATCAACCGTCTTTCTGCGCCGGAAT<br>TTCCCCTCATTTACGAACGCATTTCGCGACGCTGGCGCTAGGGCTTGGCAAATTCAGTAAACCGTA<br>CCGATGGGAAGGGCAGCAGACAATGCCAATATTCTGCTGCAACCTTACGAGTTACTAGATCTCTA<br>CCCAATGATAGCCCGCTAGCCCGTGGGACGCGCAAGAAGGCGTTCAGATCCAGCCTGGAAC<br>AATATTGGTTATTATGGTCTTACGAACGCGCTTACGGGGACGAGGAAGCGATAGCGAATGGGC<br>ATTTTGGCAGGGTTGCGCTGCCGACTCTCAACCTTGGGAATCGAGGCAGACGGCGCAATTAAG<br>GGGTGTCCTTCACTGCCAATTCGGCTTACACCGCGGAAACATTCGAGAGCATTTCGCTGCGGG<br>AGATCGTTGAAGAATCAGAGCAACTACGTTTCAATCTCGGCGCGGGAACTCCCAGGGAAGTGT<br>CATCTGTGGGGTTCTGCCAAACCTGCGAGTTTTCAGAACTGTGTCGTGGGGGCTGCACTTGA<br>CTGCCACGTTTTCTCAACCGTCGAGGAACAACCCCTTACTGCCATCACCAGGCGCTCTTTCAA<br>GCAGAGCAAGGCATTTCGGGAGCGCTCGTTCCCTAAAGTAGAGGCGCAGGGACTACCTTTTGACA                                                                                                                                                        |

|                         |                                                                                                                                                                                                                                                                                                                                                                                                                                                                                                                                                                                                                                                                                                                                                                                                                                                                                                                                                                                                                                                                                                                                                                                                                                                                                                                                                                                                                                                                                                                                                                   |
|-------------------------|-------------------------------------------------------------------------------------------------------------------------------------------------------------------------------------------------------------------------------------------------------------------------------------------------------------------------------------------------------------------------------------------------------------------------------------------------------------------------------------------------------------------------------------------------------------------------------------------------------------------------------------------------------------------------------------------------------------------------------------------------------------------------------------------------------------------------------------------------------------------------------------------------------------------------------------------------------------------------------------------------------------------------------------------------------------------------------------------------------------------------------------------------------------------------------------------------------------------------------------------------------------------------------------------------------------------------------------------------------------------------------------------------------------------------------------------------------------------------------------------------------------------------------------------------------------------|
|                         | ATGGGGAATTCGAGCTAATTGAAGAGCCGATTGATGCTCCTTTACCAGAAAACGATCCCCTGCATT<br>TTACATCCGATCTCGTCCAGTGGTCGGCAAGCTGGCAGGAAGAATCCGAGTCGATTGGTGCTGTA<br>GTTGATTAATGGTCGAAAATATAGACAACGAGCGAGAGAAATCGGCAAATGAAATCGAGCCAGA<br>ATCTCTCCTATTGCCCGTCAAGCTTGGCAAAGTCAAATTCCTATCTAAAAGCGATTTTGAAAGC<br>CAAACAAGCTCTAGATCGAATAGAAAAAGGTATTTGCGTTAA                                                                                                                                                                                                                                                                                                                                                                                                                                                                                                                                                                                                                                                                                                                                                                                                                                                                                                                                                                                                                                                                                                                                                                                                                                     |
| PipX                    | ATGACTAAAAAATACAGACGAGTTAGTTATGCAGTTTGGGAAATTACCTTGAAATGCAATCTAGCTT<br>GTAGTACTGTGGTTCGAGAGCAGGGCAGGCAAGAACCAAGGAACCTATCTACAGAAGAAGCTTTT<br>AATCTGGTTCGGCAACTAGCCGATGTAGGAATCAAAGAGTTACTCTAATCGGTGGCGAAGCCTT<br>TATGCGCTCTGATTGGCTAGAAATTGCCAAGGCTGTTACTGAGGCAGGGATGATCTGCGGTATGA<br>CTACAGGTGGATTTGGTGTGAGTTTGGAACTGCCAGAAAAATGAAAGAAGCTGGAATTAACA<br>GTTTCTGTATCTATCGATGGTGGCATAACAGAAACCCACGATCGCCAGCGAGGGAAAAAAGGTGC<br>TTGGCATTCTGCTTTTAGAACCATGAGCCATCTAAAAGAAGTCGGCATCTATTTTGGCTGCAATAC<br>CCAGATAAACCGTTTATCTGCCTCTGAATCCCAATAATTTACGAACGAATAAGGGACGCTGGAGC<br>AAGAGCTTGGCAGATTCAATTAAGTGTACCTATGGGTAATGCGGCAGATAATGCAGACATGTTATT<br>GCAACCATACGAACCTATTAGATATTTATCCCATGTTAGCTCGTGTGCTAAACGAGCTAAACAGGA<br>AGGTGTTTCGCATACAGGCGGAAATAATATTGGCTATTATGGCCCTTATGAAAGACTGCTGCGTG<br>GTAGTGATGAATGGACATTTTGGCAGGGTTCGGGAGCGGGTTTAAATACCTTGGGTATCGAAGCT<br>GATGGCAAAATTAAGGTTGTCCTTCTTTACCTACGGCTGCTTATACGGGCGGTAATATCCGCGAT<br>CGCCCTTAAGAGAAATAGTCGAACAGACTGAAGAGCTTAAATTTAATCTGAAGGCTGGGACTGAA<br>CAGGGCACAGACCACATGTGGGGATTTGTAAAACCTGTGAATTTGCTGAACTCTGTGAGGTGG<br>TTGTTCTTGGACGGCTCATGTCTTCTTTGATCGCCGTGGGAATAATCCCTACTGCCATCATCGTGC<br>TTTGAAACAGGCACAAAAAGACATCAGAGAAAGATTCTATTTAAAAGTAAAAGCAAAGGGAATCC<br>TTTTGATAATGGGGAATTTGTCATTATAGAAGAACCTTTCAACGCACCTTTGCCAGAGAACGATTT<br>GCTTCATTTTAAATAGCGATCACATTCAGTGGCCAGAAAACCTGGCAAAATCTGAATCTGCTTACGC<br>TTTAGCAAAGTAA                                                                                                                                                                                   |
| PipY                    | ATGAACTCTAATCAAATACCAAATAAAGTAGCCACAGCAGCTCAAAAATCAGATGATTCCAGCTCG<br>GTTTTACCTCGTCAGGGTTGGCAAGACAAGCAAGCTTTTATCAAAGCATTAAATTAAGCAAAAACA<br>AGTTTAGAAATTGCTGAAATTAGCAATTTTCTGACATAA                                                                                                                                                                                                                                                                                                                                                                                                                                                                                                                                                                                                                                                                                                                                                                                                                                                                                                                                                                                                                                                                                                                                                                                                                                                                                                                                                                               |
| PipXY <sub>fusion</sub> | ATGACTAAAAAATACAGACGAGTTAGTTATGCAGTTTGGGAAATTACCTTGAAATGCAATCTAGCTT<br>GTAGTACTGTGGTTCGAGAGCAGGGCAGGCAAGAACCAAGGAACCTATCTACAGAAGAAGCTTTT<br>AATCTGGTTCGGCAACTAGCCGATGTAGGAATCAAAGAGTTACTCTAATCGGTGGCGAAGCCTT<br>TATGCGCTCTGATTGGCTAGAAATTGCCAAGGCTGTTACTGAGGCAGGGATGATCTGCGGTATGA<br>CTACAGGTGGATTTGGTGTGAGTTTGGAACTGCCAGAAAAATGAAAGAAGCTGGAATTAACA<br>GTTTCTGTATCTATCGATGGTGGCATAACAGAAACCCACGATCGCCAGCGAGGGAAAAAAGGTGC<br>TTGGCATTCTGCTTTTAGAACCATGAGCCATCTAAAAGAAGTCGGCATCTATTTTGGCTGCAATAC<br>CCAGATAAACCGTTTATCTGCCTCTGAATCCCAATAATTTACGAACGAATAAGGGACGCTGGAGC<br>AAGAGCTTGGCAGATTCAATTAAGTGTACCTATGGGTAATGCGGCAGATAATGCAGACATGTTATT<br>GCAACCATACGAACCTATTAGATATTTATCCCATGTTAGCTCGTGTGCTAAACGAGCTAAACAGGA<br>AGGTGTTTCGCATACAGGCGGAAATAATATTGGCTATTATGGCCCTTATGAAAGACTGCTGCGTG<br>GTAGTGATGAATGGACATTTTGGCAGGGTTCGGGAGCGGGTTTAAATACCTTGGGTATCGAAGCT<br>GATGGCAAAATTAAGGTTGTCCTTCTTTACCTACGGCTGCTTATACGGGCGGTAATATCCGCGAT<br>CGCCCTTAAGAGAAATAGTCGAACAGACTGAAGAGCTTAAATTTAATCTGAAGCTGGGACTGAA<br>CAGGGCACAGACCACATGTGGGGATTTGTAAAACCTGTGAATTTGCTGAACTCTGTGAGGTGG<br>TTGTTCTTGGACGGCTCATGTCTTCTTTGATCGCCGTGGGAATAATCCCTACTGCCATCATCGTGC<br>TTTGAAACAGGCACAAAAAGACATCAGAGAAAGATTCTATTTAAAAGTAAAAGCAAAGGGAATCC<br>TTTTGATAATGGGGAATTTGTCATTATAGAAGAACCTTTCAACGCACCTTTGCCAGAGAACGATTT<br>GCTTCATTTTAAATAGCGATCACATTCAGTGGCCAGAAAACCTGGCAAAATCTGAATCTGCTTACGC<br>TTTAGCAAAGATGAACTCTAATCAAATACCAAATAAAGTAGCCACAGCAGCTCAAAAATCAGATGA<br>TTCCAGCTCGGTTTTACCTCGTCAGGGTTGGCAAGACAAGCAAGCTTTTATCAAAGCATTAAATTA<br>AGCAAAAACAAGTTTAGAAATTGCTGAAATTAGCAATTTTCTGACATAATAA |
| His <sub>6</sub> -RhaA  | ATGGGCAGCAGCCATCACCATCATCACCACAGCCAGGATCCGATGAAAAACGTAAAACCTTGATAC<br>AAACCATGTTGTTGAGGCTGTAGAGCTACTAAAACAAAGTTGAAGGCGGGATTAACGCTACCGGTC<br>AGCGTATCGACTCCTCGGTTTTTACCCACTGTGACTTTTTTGTGGTGTAGCGCTGTACGGCA<br>GCGTAATTGATCCTCATCGTTTCGATATGTTGCCTTAA                                                                                                                                                                                                                                                                                                                                                                                                                                                                                                                                                                                                                                                                                                                                                                                                                                                                                                                                                                                                                                                                                                                                                                                                                                                                                                              |
| RhaX                    | ATGACATCGCTTGCAAACTCCGGCATTAACTCCGACACCGCCAAACCTATGCTGTATGGGAAAT<br>CACCTAAAATGCAATCTGGCTTGCAGCCATTGTGTTTCGAGGGCAGGCGATTACAGTGTAAACG<br>AGCTGAGTACCAGCGAGGCGCTGGATCTGGTGACGAAATGGCTGAGCTTGGTATCGAGGATGT<br>TTCTCTGATCGGCGGTGAGGCATTTTTCGACCCAGACTGGTTAATTATTGCTGCAGAAATTACCCG<br>TCTTGGCATGAATGCCAATGACGACCGGGGGCTACGGGATATCACGCGGTACGGCAAAACGG<br>ATGAAAGAAGCGGGTATCAGTAACGTTTCGGTATCGGTAGATGGCCTTGAGGCTACGCACGATAA                                                                                                                                                                                                                                                                                                                                                                                                                                                                                                                                                                                                                                                                                                                                                                                                                                                                                                                                                                                                                                                                                                                                              |

|                                                      |                                                                                                                                                                                                                                                                                                                                                                                                                                                                                                                                                                                                                                                                                                                                                                                                                                                                                                                                                                                                                                                                                                                                                                                                                                                                                                                                                                                                                                                                                                                                                                                                                                                                       |
|------------------------------------------------------|-----------------------------------------------------------------------------------------------------------------------------------------------------------------------------------------------------------------------------------------------------------------------------------------------------------------------------------------------------------------------------------------------------------------------------------------------------------------------------------------------------------------------------------------------------------------------------------------------------------------------------------------------------------------------------------------------------------------------------------------------------------------------------------------------------------------------------------------------------------------------------------------------------------------------------------------------------------------------------------------------------------------------------------------------------------------------------------------------------------------------------------------------------------------------------------------------------------------------------------------------------------------------------------------------------------------------------------------------------------------------------------------------------------------------------------------------------------------------------------------------------------------------------------------------------------------------------------------------------------------------------------------------------------------------|
|                                                      | <p>GCTACGTGGTAAGCTGGGTGCCTGGCAGCAATGTTTTAAGACGATAGAACATTTACGCGCCGTGG<br/> GGATCAATGTTGGCTGCAATACGCAGATCAACAAGCACTCCGCTACCGAGTTGCCATGTTGTAT<br/> CAGCAATTAGTCCAGCATGGCGTGTGGCCTGGCAGATACAGCTTACCGTACCAATGGGCAATG<br/> CGGTAGAGCATAACGCTATGTTGCTGCAGCCTTACGAGCTACTGGAGTTATATCCAGTGCTGGCG<br/> TATCTGTCTAACCGCGCCGTAAGGATAAACTTATGGTGCAGCCGGTAATAACATCGGTTACTTT<br/> GGTCCGTACGAGCGCCTGTTGCGGGAGCCGATTTCCCGTACCCGCGACTTTGCGTTTTCCGCG<br/> GCTGTGGTGCGGGCATAAATACCATAGGCATAGAAGCGGACGGCAAAGTAAAAGGTTGCCCTTCT<br/> TTACCTTCCGAGCAATACACTGGCGGTAATATCCGTGAACGTAGCTTGCGCGATATTTATGAAAAC<br/> AGTAAAGAGCTACGATTTAACGATATCAATAAGCCTGAAGATGTCACGGCCCATATGTGGGGCGA<br/> TTGCGCAAGTTGTGAATACGCCAAGGTCTGCCGCGCTGGCTGCAGTTGGACAGCTCATGTCTTTT<br/> TTGGTCGGCGCGGAATAACCCCTATTGCCATACCCGGCATTGAAGAAAAGCCGTGCTGGGCAA<br/> GATGGAGCGTTTTTACCTGAAAACGCCTGCTGCCGGCCAGCCATTTGACCATGGTGTGTTGAAC<br/> TGTTGAGGAGCAGATTAAGCCATTTGACCCGATGGACCCGGCACACTTTAGTATTGCCAAAACA<br/> CAGTTTCCAGCTGAGTGGTTGGCGAAGAACCTGATCTGCAGAAAAGCCTTATGCTGGAGAGAAG<br/> TATGCTGATGCTGCAGTACGTTGAAAGCGGTATAGTCAAACAGGCCACTCGCCATGGTTTGATC<br/> CCGCTAAGCGTGAGGCGATAAAACAGGGTATCGCAATAGCCAGCTAG</p>                                                                                                                                                                                                                                                                                                                                                                                                                                                                                                                  |
| RhaX <sub>leader</sub>                               | <p>ATGACATCGCTTGCAAACCTCCGGCATTAACTCCGACACCGCCAAACCTATGCTGTATGGGAAAT<br/> CACCCATAAATGCAATCTGGCTTGCAGCCATTGTGGTTTCGAGGGCAGGCGATTACAGTGTAACG<br/> AGCTGAGTACCAGCGAGGCGCTGGATCTGGTGCAGCAAATGGCTGAGCTTGGTATCGAGGATGT<br/> TTCTCTGATCGGCGGTGAGGCATTTTTGCGACCCAGACTGGTTAATTATTGCTGCAGAAATTACCCG<br/> TCTTGGCATGAATGCCAACATGACGACCGGGGGCTACGGGATATCACGCGGTACGGCAAACCG<br/> ATGAAAGAAGCGGGTATCAGTAACGTTTCGGTATCGGTAGATGGCCTTGAAGGCTACGCACGATAA<br/> GCTACGTGGTAAGCTGGGTGCCTGGCAGCAATGTTTTAAGACGATAGAACATTTACCGCCGTGG<br/> GGATCAATGTTGGCTGCAATACGCAGATCAACAAGCACTCCGCTACCGAGTTGCCATGTTGTAT<br/> CAGCAATTAGTCCAGCATGGCGTGTGGCCTGGCAGATACAGCTTACCGTACCAATGGGCAATG<br/> CGGTAGAGCATAACGCTATGTTGCTGCAGCCTTACGAGCTACTGGAGTTATATCCAGTGCTGGCG<br/> TATCTGTCTAACCGCGCCGTAAGGATAAACTTATGGTGCAGCCGGTAATAACATCGGTTACTTT<br/> GGTCCGTACGAGCGCCTGTTGCGGGAGCCGATTTCCCGTACCCGCGACTTTGCGTTTTCCGCG<br/> GCTGTGGTGCGGGCATAAATACCATAGGCATAGAAGCGGACGGCAAAGTAAAAGGTTGCCCTTCT<br/> TTACCTTCCGAGCAATACACTGGCGGTAATATCCGTGAACGTAGCTTGCGCGATATTTATGAAAAC<br/> AGTAAAGAGCTACGATTTAACGATATCAATAAGCCTGAAGATGTCACGGCCCATATGTGGGGCGA<br/> TTGCGCAAGTTGTGAATACGCCAAGGTCTGCCGCGCTGGCTGCAGTTGGACAGCTCATGTCTTTT<br/> TTGGTCGGCGCGGAATAACCCCTATTGCCATACCCGGCATTGAAGAAAAGCCGTGCTGGGCAA<br/> GATGGAGCGTTTTTACCTGAAAACGCCTGCTGCCGGCCAGCCATTTGACCATGGTGTGTTGAAC<br/> TGTTGAGGAGCAGATTAAGCCATTTGACCCGATGGACCCGGCACACTTTAGTATTGCCAAAACA<br/> CAGTTTCCAGCTGAGTGGTTGGCGAAGAACCTGATCTGCAGAAAAGCCTTATGCTGGAGAGAAG<br/> TATGCTGATGCTGCAGTACGTTGAAAGCGGTATAGTCAAACAGGCCACTCGCCATGGTTTGATC<br/> CCGCTAAGCGTGAGGCGATAAAACAGGGTATCGCAATAGCCAGCATGAAAACGTAAAACCTTGAT<br/> ACAAACCATGTTGTTGAGGCTGTAGAGCTACTAAACAAAGTTGAATAG</p> |
| His <sub>6</sub> -SUMO-<br>Rha <sub>core</sub>       | <p>ATGGGTAGCCACCACCACCACCATCATATAGCAGCGGTTTAGTTCCTCGTGGTTCAGCTAGCCA<br/> CATCAACCTGAAGGTGAAAGGCCAGGATGGCAACGAGGTGTTCTTCCGCATTAACCGCTCAACCC<br/> AGCTGAAGAAGCTGATGAACCGCTACTGCGATCGTACAGCGGTGGATATACCGCAATTGCGTTT<br/> CTGTTTCGATGGTCTGCTTTACGTGCAGAACAAACCCCGACGAACTGGAATGGAAGATGGCG<br/> ACGAGATTGATGCCATGCTGCATCAGACCGGTGGCCATATGGCTAGCATGACTGGTGGACAGGG<br/> CGGGATTAACGCTACCGGTGAGCGTATCGACTCCTCGGTTTTTACCCACTGTGACTTTTTCGTTT<br/> TGGTGTAGCGCTGTACGGCAGCGTAATTGATCCTCATCGTTTCGATATGTTGCCCTTGACAAAT</p>                                                                                                                                                                                                                                                                                                                                                                                                                                                                                                                                                                                                                                                                                                                                                                                                                                                                                                                                                                                                                                                                                                                                                           |
| His <sub>6</sub> -mCherry109-<br>Rha <sub>core</sub> | <p>ATGGGCAGCAGCCATCACCATCATCACCACAGCCAGGATCCGGTGAGCAAGGGCGAGGAGGATA<br/> ACATGGCCATCATCAAGGAGTTCATGCGCTTCAAGGTGCACATGGAGGGCTCCGTGAACGGCCA<br/> CGAGTTTCGAGATCGAGGGCGAGGGCGAGGGCCGCCCTACGAGGGCACCCAGACCGCCAAGCT<br/> GAAGTGACCAAGGGTGGCCCCCTGCCCTTCGCTGGGACATCCTGTCCCTCAGTTTCATGTAC<br/> GGCTCCAAGGCCTACGTGAAGCACCCCGCCGACATCCCCGACTACTTGAAGCTGTCTTCCCG<br/> AGGGCTTCAAGTGGGAGCGGTGATGAACCTTCAGGACGGCGGCGTGGTACCCTGACCCAGG<br/> ACTCCTCCCTGCAGGACGGCGAGTTCATCTACAAGGTGAAGCTGCGCGGCACCAACTTCCCTC<br/> CGACGGCCCCGTAATGCAGAAGAAGACCATGGGCTGGGAGGCCTCCTCCGAGCGGATGTACCC<br/> CGAGGACGGCGCCCTGAAGGGCGAGATCAAGCAGAGGCTGAAGCTGAAGGACGGCGGCCACTA<br/> CGACGCTGAGGTCAAGACCACCTACAAGGCCAAGAAGCCCGTGCAGCTGCCCGGGCGGCGCAT<br/> TAACGCTACCGGTGAGCGTATCGACTCCTCGGTTTTTACCCACTGTGACTTTTTCGTTTGTGGTGT<br/> AGCGCTGTACGGCAGCGTAATTGATCCTCATCGTTTCGATATGTTGCCCTGGGGGAGCCTACAACG<br/> TCAACATCAAGTTGGACATCACCTCCCACAACGAGGACTACACCATCGTGAACAGTACGAAACG</p>                                                                                                                                                                                                                                                                                                                                                                                                                                                                                                                                                                                                                                                                                                                               |

|                                                   |                                                                                                                                                                                                                                                                                                                                                                                                                                                                                                                                                                                                                                                                                                                                                                                                                                                                                                                                                                                                                                                                                                                                                                                                                                                                                                                                                                                                                                                                                                                                                           |
|---------------------------------------------------|-----------------------------------------------------------------------------------------------------------------------------------------------------------------------------------------------------------------------------------------------------------------------------------------------------------------------------------------------------------------------------------------------------------------------------------------------------------------------------------------------------------------------------------------------------------------------------------------------------------------------------------------------------------------------------------------------------------------------------------------------------------------------------------------------------------------------------------------------------------------------------------------------------------------------------------------------------------------------------------------------------------------------------------------------------------------------------------------------------------------------------------------------------------------------------------------------------------------------------------------------------------------------------------------------------------------------------------------------------------------------------------------------------------------------------------------------------------------------------------------------------------------------------------------------------------|
|                                                   | GCCGAGGGCCGCCACTCCACCGGCGGCATGGACGAGCTGTACAAGGAATTGAAGCTTAGATCTTGA                                                                                                                                                                                                                                                                                                                                                                                                                                                                                                                                                                                                                                                                                                                                                                                                                                                                                                                                                                                                                                                                                                                                                                                                                                                                                                                                                                                                                                                                                        |
| His <sub>6</sub> -DHFR118-RhaA <sub>core</sub>    | ATGGGCAGCAGCCATCACCATCATCACCACAGCCAGGATCCGGAGAATGCCATGCCATGGAATC<br>TGCCTGCTGATCTTGCCTGGGTGAAACGCAATACCCTGAACAAACCGTTATCATGGGGCGCCAT<br>ACCTGGGAAAGCATTGGCCGTCCTTTGCCAGGTCGGAAGAACATCATCCTGAGCAGTCAACCGG<br>GCACAGATGACCGTGTACGTGGGTCAAATCCGTGGATGAAGCGATTGCAGCATGTGGCGATGT<br>TCCGGAGATCATGGTGATTGGCGGAGGTGCGCTATACGAACAGCTGTACCAGAAAGCGCAGAAA<br>CTCTATCTGACTCACATTGACGCCGAAGTAGAAGGCGGGATTAACGCTACCGGTGACGCTATCGA<br>CTCCTCGGTTTTTACCCTACTGTGACTTTTTCTGTTTGTGGTGTAGCGCTGTACGGCAGCGTAATTGA<br>TCCTCATCGTTTCGATATGTTGCCCTGGGGATACCCATTATCCGGACTATGAACCCGACGATTGGG<br>AACGCGTGTAGCGAGTATCAGATGCTGATGCCAGAAGCTCGCATTCTACTGCTACGAGATT<br>CTGGAACGTCGTGTTTACGCTCTCACCATCATCACCACCATTAA                                                                                                                                                                                                                                                                                                                                                                                                                                                                                                                                                                                                                                                                                                                                                                                                                                                                       |
| His <sub>6</sub> -MBP-Cterm-RhaA <sub>core</sub>  | ATGGGCAGCAGCCATCATCATCATCACAGCAGCGGCCTGGTGCCGCGCGGCAGCCATAATA<br>AAATCGAAGAAGGTAACTGGTAATCTGGATTAACGGCGATAAAGGCTATAACGGTCTCGCTGAA<br>GTCGGTAAGAAATTCGAGAAAAGATAACCGAATTAAGTCAACCGTTGAGCATCCGGATAAACTGGA<br>AGAGAAATCCACAGGTTGCGGCAACTGGCGATGGCCCTGACATTATCTTCTGGGCACACGACC<br>GCTTTGGTGCTACGCTCAATCTGGCCTGTTGGCTGAAATCACCCCGACAAAGCGTTCAGGAC<br>AAGCTGTATCCGTTTACCTGGGATGCCGTACGTTACAACGGCAAGCTGATTGCTTACCCGATCGC<br>TGTTGAAGCGTTATCGCTGATTTATAACAAAGATCTGCTGCCGAACCCGCCAAAAACCTGGGAAG<br>AGATCCCGGCGCTGGATAAAGAACTGAAAGCGAAAGGTAAGAGCGCGCTGATGTTCAACCTGCA<br>AGAACCGTACTTACCTGGCCGCTGATTGCTGCTGACGGGGTTATGCGTTCAAGTATGAAAACG<br>GCAAGTACGACATTAAGACGTGGGCGTGGATAACGCTGGCGCGAAAGCGGGTCTGACCTTCT<br>GGTTGACCTGATTAACAAACACATGAATGCAGACACCGATTACTCCATCGCAGAAGCTGCCTT<br>TAATAAAGGCGAAACAGCGATGACCATCAACGCCCGTGGGCATGGTCCAACATCGACACCAGC<br>AAAGTGAATTATGGTGAACGCTACTGCCGACCTTCAAGGGTCAACCATCCAAACCGTTCGTTGG<br>CGTGCTGAGCGCAGGTATTAACGCCGCCAGTCCGAACAAAGAGCTGGCAAAAGAGTTCCTCGAA<br>AACTATCTGCTGACTGATGAAGGTCTGGAAGCGGTTAATAAAGACAAACCGCTGGGTGCCGTAGC<br>GCTGAAGTCTTACGAGGAAGAGTTGGCGAAAGATCCACGTATTGCCGCCACTATGGAAAACGCC<br>AGAAAGGTGAAATCATGCCGAACATCCCGCAGATGTCGCTTTCTGGTATGCCGTGCGTACTGCG<br>GTGATCAACGCCGCCAGCGGTGTCAGACTGTGATGAAGCCCTGAAAGACGCGCAGACTAATT<br>CGAGCTCGAACAACAACAATAACAATAACAACAACCTCGGGATCGAGGGACTGTACTTCCAG<br>TCAGGATCCGAATTCGAGCTCGGCGCGCTGCAGGTGACGAAAGCTTGGCGCCGATAATGCTTA<br>AGTCGAACGAAAGGCGGGATTAACGCTACCGGTACCGGTATCGACTCCTCGGTTTTTACCAC<br>TGTGACTTTTTCTGTTTGTGGTGTAGCGCTGTACGGCAGCGTAATTGATCCTCATCGTTTTCGATATG<br>TTGCCTTAA  |
| His <sub>6</sub> -MBP154-RhaA <sub>core</sub>     | ATGGGCAGCAGCCATCATCATCATCACAGCAGCGGCCTGGTGCCGCGCGGCAGCCATAATA<br>AAATCGAAGAAGGTAACTGGTAATCTGGATTAACGGCGATAAAGGCTATAACGGTCTCGCTGAA<br>GTCGGTAAGAAATTCGAGAAAAGATAACCGAATTAAGTCAACCGTTGAGCATCCGGATAAACTGGA<br>AGAGAAATCCACAGGTTGCGGCAACTGGCGATGGCCCTGACATTATCTTCTGGGCACACGACC<br>GCTTTGGTGCTACGCTCAATCTGGCCTGTTGGCTGAAATCACCCCGACAAAGCGTTCAGGAC<br>AAGCTGTATCCGTTTACCTGGGATGCCGTACGTTACAACGGCAAGCTGATTGCTTACCCGATCGC<br>TGTTGAAGCGTTATCGCTGATTTATAACAAAGATCTGCTGCCGAACCCGCCAAAAACCTGGGAAG<br>AGATCCCGGGCGGGATTAACGCTACCGGTACCGGTATCGACTCCTCGGTTTTTACCCTACTGTGAC<br>TTTTCTGTTTGTGGTGTAGCGCTGTACGGCAGCGTAATTGATCCTCATCGTTTTCGATATGTTGCC<br>GCGCTGGATAAAGAACTGAAAGCGAAAGGTAAGAGCGCGCTGATGTTCAACCTGCAAGAACCCT<br>ACTTACCTGGCCGCTGATTGCTGCTGACGGGGTTATGCGTTCAAGTATGAAAACGGCAAGTAC<br>GACATTAAGACGTGGGCGTGGATAACGCTGGCGCGAAAGCGGGTCTGACCTTCTGGTTGACC<br>TGATTAACAAACAACACATGAATGCAGACACCGATTACTCCATCGCAGAAGCTGCCTTTAATAAAG<br>GCGAAACAGCGATGACCATCAACGCCCGTGGGCATGGTCCAACATCGACACCAGCAAAGTGAA<br>TTATGGTGAACGGTACTGCCGACCTTCAAGGGTCAACCATCCAAACCGTTTCTGGCGTGTGTA<br>GCGCAGGTATTAACGCCCGAGTCCGAACAAAGAGCTGGCAAAAGAGTTCCTCGAAAACATCTG<br>CTGACTGATGAAGGTCTGGAAGCGGTTAATAAAGACAAACCGCTGGGTGCCGTAGCGCTGAAGT<br>CTTACGAGGAAGAGTTGGCGAAAGATCCACGTATTGCCGCCACTATGGAAAACGCCAGAAAGGT<br>GAAATCATGCCGAACATCCCGCAGATGTCGCTTTCTGGTATGCCGTGCGTACTGCGGTGATCAA<br>CGCCGCCAGCGGTGTCAGACTGTGATGAAGCCCTGAAAGACGCGCAGACTAATTGAGCTCG<br>AACAAACAACAATAACAATAACAACAACCTCGGGATCGAGGGACTGTACTTCCAGTCAGGATC<br>CGAATTGAGCTCGGCGCGCTGCAGGTGACAAAGCTTGGCGCCGCATAATGCTTAAGTCGAAC<br>AGAAAGTAA |
| DHFR-Nterm-RhaA <sub>core</sub> -His <sub>6</sub> | ATGGGCGGGATTAACGCTACCGGTGACGCTATCGACTCCTCGGTTTTTACCCTACTGTGACTTTTT<br>CGTTTTGTGGTGTAGCGCTGTACGGCAGCGTAATTGATCCTCATCGTTTTCGATATGTTGCCCTCAGG                                                                                                                                                                                                                                                                                                                                                                                                                                                                                                                                                                                                                                                                                                                                                                                                                                                                                                                                                                                                                                                                                                                                                                                                                                                                                                                                                                                                                |

|                                                        |                                                                                                                                                                                                                                                                                                                                                                                                                                                                                                             |
|--------------------------------------------------------|-------------------------------------------------------------------------------------------------------------------------------------------------------------------------------------------------------------------------------------------------------------------------------------------------------------------------------------------------------------------------------------------------------------------------------------------------------------------------------------------------------------|
|                                                        | ATCCGGAGAATGCCATGCCATGGAATCTGCCTGCTGATCTTGCGTGGGTGAAACGCAATACCCTG<br>AACAAACCGGTTATCATGGGGCGCCATACCTGGGAAAGCATTGGCCGTCCTTTGCCAGGTCGGA<br>AGAACATCATCCTGAGCAGTCAACCGGGCACAGATGACCGTGTACAGTGGGTCAAATCCGTGGA<br>TGAAGCGATTGCAGCATGTGGCGATGTTCCGGAGATCATGGTGATTGGCGGAGGTGCGGTATAC<br>GAACAGCTGTTACCGAAAGCGCAGAACTCTATCTGACTCACATTGACGCCGAAGTAGAAGGGGA<br>TACCCATTATCCGGACTATGAACCCGACGATTGGGAACGCGTGTTTAGCGAGTATCACGATGCTG<br>ATGCCAGAACTCGCATTCTGACTGCTACGAGATTCTGGAACGTCGTGGTTACAGCTCTACCAT<br>CATCACCACCATTA |
| His <sub>6</sub> -SUMO-<br>Nterm-RhaA <sub>core</sub>  | ATGGGTAGCCACCACCACCACCATCATATAGCAGCGGTGGCGGGATTAACGCTACCGGTCAGC<br>GTATCGACTCCTCGGTTTTTACCCACTGTGACTTTTTCGTTTTGGTGTAGCGCTGTACGGCAGCG<br>TAATTGATCCTCATCGTTTTGATATGTTGCCTTTAGTTCCTCGTGTTTCAGCTAGCCACATCAACCT<br>GAAGGTGAAAGGCCAGGATGGCAACGAGGTGTTCTTCCGCATTAACGCTCAACCCAGCTGAAG<br>AAGCTGATGAACGCGTACTGCGATCGTCAGAGCGTGGATATGACCGCAATTGCGTTCCTGTTCTGA<br>TGTCGTCGTTTTACGTGCAGAACAAACCCCGGACGAACTGGAATGGAAGATGGCGACGAGATT<br>GATGCCATGCTGCATCAGACCGGTGGC                                                      |
| His <sub>6</sub> -SUMO-<br>Rha <sub>core</sub> -N8     | ATGGGTAGCCACCACCACCACCATCATATAGCAGCGGTTAGTTCCTCGTGTTTCAGCTAGCCA<br>CATCAACCTGAAGGTGAAAGGCCAGGATGGCAACGAGGTGTTCTTCCGCATTAACGCTCAACCC<br>AGCTGAAGAAGCTGATGAACGCGTACTGCGATCGTCAGAGCGTGGATATGACCGCAATTGCGTTC<br>CTGTTTCGATGGTCGTCGTTTTACGTGCAGAACAAACCCCGGACGAACTGGAATGGAAGATGGCG<br>ACGAGATTGATGCCATGCTGCATCAGACCGGTGGCCATGGCGGGATTAACGCTACCGGTCAGCG<br>TATCGACTCCTCGGTTTTTACCCACTGTGACTTTTTTCGTTTTGGTGTAGCGCTGTACGGCAGCGT<br>AATTGATCCTCATCGTTTTGATATGTTGCCT                                                  |
| His <sub>6</sub> -SUMO-<br>Rha <sub>core</sub> -N24    | ATGGGTAGCCACCACCACCACCATCATATAGCAGCGGTTAGTTCCTCGTGTTTCAGCTAGCCA<br>CATCAACCTGAAGGTGAAAGGCCAGGATGGCAACGAGGTGTTCTTCCGCATTAACGCTCAACCC<br>AGCTGAAGAAGCTGATGAACGCGTACTGCGATCGTCAGAGCGTGGATATGACCGCAATTGCGTTC<br>CTGTTTCGATGGTCGTCGTTTTACGTGCAGAACAAACCCCGGACGAACTGGAATGGAAGATGGCG<br>ACGAGATTGATGCCATGCTGCATCAGACCGGTGGCCATCACTGTGACTTTTTTCGTTTTGGTGT<br>GCGCTGTACGGCAGCGTAATTGATCCTCATCGTTTTGATATGTTGCCT                                                                                                       |
| His <sub>6</sub> -SUMO-<br>Rha <sub>core</sub> -N32    | ATGGGTAGCCACCACCACCACCATCATATAGCAGCGGTTAGTTCCTCGTGTTTCAGCTAGCCA<br>CATCAACCTGAAGGTGAAAGGCCAGGATGGCAACGAGGTGTTCTTCCGCATTAACGCTCAACCC<br>AGCTGAAGAAGCTGATGAACGCGTACTGCGATCGTCAGAGCGTGGATATGACCGCAATTGCGTTC<br>CTGTTTCGATGGTCGTCGTTTTACGTGCAGAACAAACCCCGGACGAACTGGAATGGAAGATGGCG<br>ACGAGATTGATGCCATGCTGCATCAGACCGGTGGCCATGTAGCGCTGTACGGCAGCGTAATTGAT<br>CCTCATCGTTTTGATATGTTGCCT                                                                                                                              |
| His <sub>6</sub> -SUMO-<br>Rha <sub>core</sub> -N24C4  | ATGGGTAGCCACCACCACCACCATCATATAGCAGCGGTTAGTTCCTCGTGTTTCAGCTAGCCA<br>CATCAACCTGAAGGTGAAAGGCCAGGATGGCAACGAGGTGTTCTTCCGCATTAACGCTCAACCC<br>AGCTGAAGAAGCTGATGAACGCGTACTGCGATCGTCAGAGCGTGGATATGACCGCAATTGCGTTC<br>CTGTTTCGATGGTCGTCGTTTTACGTGCAGAACAAACCCCGGACGAACTGGAATGGAAGATGGCG<br>ACGAGATTGATGCCATGCTGCATCAGACCGGTGGCCATCACTGTGACTTTTTTCGTTTTGGTGT<br>GCGCTGTACGGCAGCGTAATTGATCCTCATCGTTTT                                                                                                                   |
| His <sub>6</sub> -SUMO-<br>Rha <sub>core</sub> -N24C8  | ATGGGTAGCCACCACCACCACCATCATATAGCAGCGGTTAGTTCCTCGTGTTTCAGCTAGCCA<br>CATCAACCTGAAGGTGAAAGGCCAGGATGGCAACGAGGTGTTCTTCCGCATTAACGCTCAACCC<br>AGCTGAAGAAGCTGATGAACGCGTACTGCGATCGTCAGAGCGTGGATATGACCGCAATTGCGTTC<br>CTGTTTCGATGGTCGTCGTTTTACGTGCAGAACAAACCCCGGACGAACTGGAATGGAAGATGGCG<br>ACGAGATTGATGCCATGCTGCATCAGACCGGTGGCCATCACTGTGACTTTTTTCGTTTTGGTGT<br>GCGCTGTACGGCAGCGTAATTGAT                                                                                                                               |
| His <sub>6</sub> -SUMO-<br>Rha <sub>core</sub> -N24C10 | ATGGGTAGCCACCACCACCACCATCATATAGCAGCGGTTAGTTCCTCGTGTTTCAGCTAGCCA<br>CATCAACCTGAAGGTGAAAGGCCAGGATGGCAACGAGGTGTTCTTCCGCATTAACGCTCAACCC<br>AGCTGAAGAAGCTGATGAACGCGTACTGCGATCGTCAGAGCGTGGATATGACCGCAATTGCGTTC<br>CTGTTTCGATGGTCGTCGTTTTACGTGCAGAACAAACCCCGGACGAACTGGAATGGAAGATGGCG<br>ACGAGATTGATGCCATGCTGCATCAGACCGGTGGCCATCACTGTGACTTTTTTCGTTTTGGTGT<br>GCGCTGTACGGCAGCGTA                                                                                                                                     |



## Supplementary References

- 1 Scott, T. A. *et al.* Widespread microbial utilization of ribosomal  $\beta$ -amino acid-containing peptides and proteins. *Chem* **8**, 2659-2677, (2022).
- 2 Jumper, J. *et al.* Highly accurate protein structure prediction with AlphaFold. *Nature* **596**, 583-589, (2021).
- 3 Varadi, M. *et al.* AlphaFold protein structure database: Massively expanding the structural coverage of protein-sequence space with high-accuracy models. *Nucleic Acids Res.* **50**, 439-444, (2021).
- 4 Morinaka, B. I. *et al.* Natural noncanonical protein splicing yields products with diverse  $\beta$ -amino acid residues. *Science* **359**, 779-782, (2018).
- 5 Kitagawa, M. *et al.* Complete set of ORF clones of *Escherichia coli* ASKA library (a complete set of *E. coli* K-12 ORF archive): Unique resources for biological research. *DNA Res.* **12**, 291-299, (2005).
- 6 Vagstad, A. L. *et al.* Mechanistic insights into post-translational  $\alpha$ -keto- $\beta$ -amino acid formation by a radical S-adenosyl methionine peptide splicease. *Submitted*, (2024).
- 7 Robert, X. & Gouet, P. Deciphering key features in protein structures with the new ENDscript server. *Nucleic Acids Res.* **42**, 320-324, (2014).
